# Supplementary material
Source: PubMed Central journal article supplement (PMC2873835)
Supplement: NIHMS30569-supplement-supp_info.pdf [file NIHMS30569-supplement-supp_info.pdf]

## Somatic mutations of the histone H3K27 demethylase, *UTX*, in human cancer. van Haaften et al.

### Supplementary Information

#### Materials/Methods –

Genomic DNA samples were obtained from cancer cell lines or from patient samples as indicated. Collection and use of patient samples were approved by the IRB of each institution in addition to the study having LREC approval locally. Cancer cell lines and clinical samples screened are given in Supplemental Tables 1 and 2, respectively.

SNP-Array hybridization was as per Affymetrix Protocols and as previously described<sup>1</sup>. PCR-based exon resequencing was performed and data analysed as previously described<sup>1</sup>. Primer sequences are listed in Supplemental Table 3.

For RT-PCR analysis 3µg of total RNA, extracted using TRIZOL (Invitrogen), was reverse transcribed using Superscript III (Invitrogen). cDNA equivalent to 16ng input RNA was used in each subsequent PCR reaction. RT PCR specific primers (2.5ng/µl) are listed in Supplemental Table 3.

For western blotting, total cell lysates in RIPA buffer (150 mM sodium chloride, 1% Igepal CA-630, 0.5% sodium deoxycholate, 0.1% SDS and 50 mM Tris, pH 8) with protease inhibitors (Sigma), were separated using reducing SDS-page (Nupage system, Invitrogen). Following electro-transfer to PVDF membrane (Invitrogen) blocking (4°C, 16hrs) antibody incubations and washes were done in 1x blocking buffer (Sigma) probed with primary antibodies for 3 h at RT, washed twice for 5 min and incubated with the appropriate peroxidase-linked secondary antibody for 1 h at RT and washed three times 5 min. All incubations and washes were done in 1x blocking buffer. UTX antiserum<sup>2</sup>, was diluted 1:5000. Anti-β-actin (Abcam 8226), HRP-goat-anti-mouse (Abcam 6789) and HRP-goat-anti-rabbit (Cell Signaling #7074) were diluted according to manufacturer's instructions. Protein bands were visualised using SuperSignal West Pico Chemiluminescent substrate (Pierce).

#### UTX reintroduction/expression/ChIP PCR

The full length open reading frame of UTX was cloned into pExchange-1 (Stratagene) starting from the Origene expression vector SC112984. Cells were transfected with the UTX expression vector or empty vector control using lipofectamine (Invitrogen). Cell doubling times were determined using Cyquant cell proliferation assay (Invitrogen) with puromycin selected cells. Two days post transfection the cells were harvested for RNA extraction. Gene expression was analysed on Illumina Human WG-6 v2 BeadChips following standard protocols. ChIP-QPCR was started two days after transfection using the SimpleChIP Enzymatic Chromatin IP Kit (Cell Signalling) with antibodies against H3K27me3 (Upstate 07-449). The primers sequences are shown below.

PCDH19\_f ATGGTGCACGGGAGCTGT  
PCDH19\_r GAGCTTTCTCCGGCTTTCTC

SOX21\_f TTGCTGATCTCCGAGTTGTG  
SOX21\_r GCAGCCAACATTGATTTTCCT  
SFRP4\_f GAAGGGACAGCGAAAGATGA  
SFRP4\_r CCACTAGGATGGAGAGGAACA  
APRT\_f GCCTTGACTCGCACTTTTGT  
APRT\_r TAGGCGCCATCGATTTTAAG  
ACTB\_f ACGCCTCCGACCAGTGTT  
ACTB\_r GCCCAGATTGGGGACAAA  
(SFRP4, APRT and ACTB primers are taken from Schlesinger et al. <sup>3</sup>)

## Analysis and Statistics

Data quality test and normalization were performed using the Lumi package implemented in R <sup>4</sup>. The quality of each array was assessed by checking the mean and standard deviation of over-all expression, ratios of detectable probes, expression information of control probes (housekeeping genes) and the correlation among replicated samples. Background correction of each array was using variance-stabilizing transformation<sup>5</sup>. The data were normalized by the quantile method and expression level of each gene was log transformed. Differential expression was assessed using the Limma package from BioConductor<sup>6</sup>. The paired t-test was used to assess the significant level of expression change before and after UTX reintroduction. P values were corrected by Benjamini/Hochberg paradigm with a false discovery rate of 0.05.

Enrichment tests for chromatin marks were based on comparison to target sets derived from the literature on genes with known H3K4, H3K27 and polycomb sites<sup>7,8</sup>. Significance was assessed using Pearson's chi-squared test implemented in R, comparing H3K4/K27 and polycomb target-set enrichment in genes with significantly altered expression after UTX reintroduction versus target-set enrichment in all genes included in the expression array. Expression data have been deposited in ArrayExpress, Accession number E-MTAB-84.

1. Greenman, C. et al. Patterns of somatic mutation in human cancer genomes. *Nature* **446**, 153-158 (2007).
2. Issaeva, I. et al. Knockdown of ALR (MLL2) Reveals ALR Target Genes and Leads to Alterations in Cell Adhesion and Growth. *Mol. Cell. Biol.* **27**, 1889-1903 (2007).
3. Schlesinger, Y. et al. Polycomb-mediated methylation on Lys27 of histone H3 pre-marks genes for de novo methylation in cancer. *Nat Genet* **39**, 232-236 (2007).
4. Du, P., Kibbe, W.A. & Lin, S.M. lumi: a pipeline for processing Illumina microarray. *Bioinformatics* **24**, 1547-1548 (2008).
5. Lin, S.M., Du, P., Huber, W. & Kibbe, W.A. Model-based variance-stabilizing transformation for Illumina microarray data. *Nucl. Acids Res.* **36**, e11- (2008).
6. Smyth, G. Linear models and empirical bayes methods for assessing differential expression in microarray experiments. *Stat Appl Genet Mol Biol.* **3**, article 3 (2004).
7. Bracken, A.P., Dietrich, N., Pasini, D., Hansen, K.H. & Helin, K. Genome-wide mapping of Polycomb target genes unravels their roles in cell fate transitions. *Genes & Development* **20**, 1123-1136 (2006).

8. Pan, G. et al. Whole-Genome Analysis of Histone H3 Lysine 4 and Lysine 27 Methylation in Human Embryonic Stem Cells. *Cell Stem Cell* 1, 299-312 (2007).

Supplemental Figure Legend:

Figure S1:

1a) Homo/Hemizygous *UTX* deletions in cancer cell lines. Exon/intron structure of *UTX* is shown, with cancers and extent of deletion indicated. 1b) SNP6 plot for X chromosome showing hemizygous *UTX* deletion in the AML line MONO-MAC-6. Multiplex PCR *UTX* exons 1-4 indicating exonic deletions (samples in duplicate). Arrows indicate the *UTX* specific bands. S1:MIA-PaCa-2, deletion exons 1-4; S2:RPMI-8226, no deletion; S3:MONO-MAC-6, deletion exons 3, 4. 1c) Splice site mutation in renal carcinoma showing aberrantly migrating band on RT-PCR analysis, sequencing showing generation of a cryptic splice site and resulting altered transcript. 1d) Splice splice site mutation in a glioblastoma showing altered size RT-PCR product and 50bp deletion in the resulting transcript leading to a premature termination codon.

Supplementary Figure 1

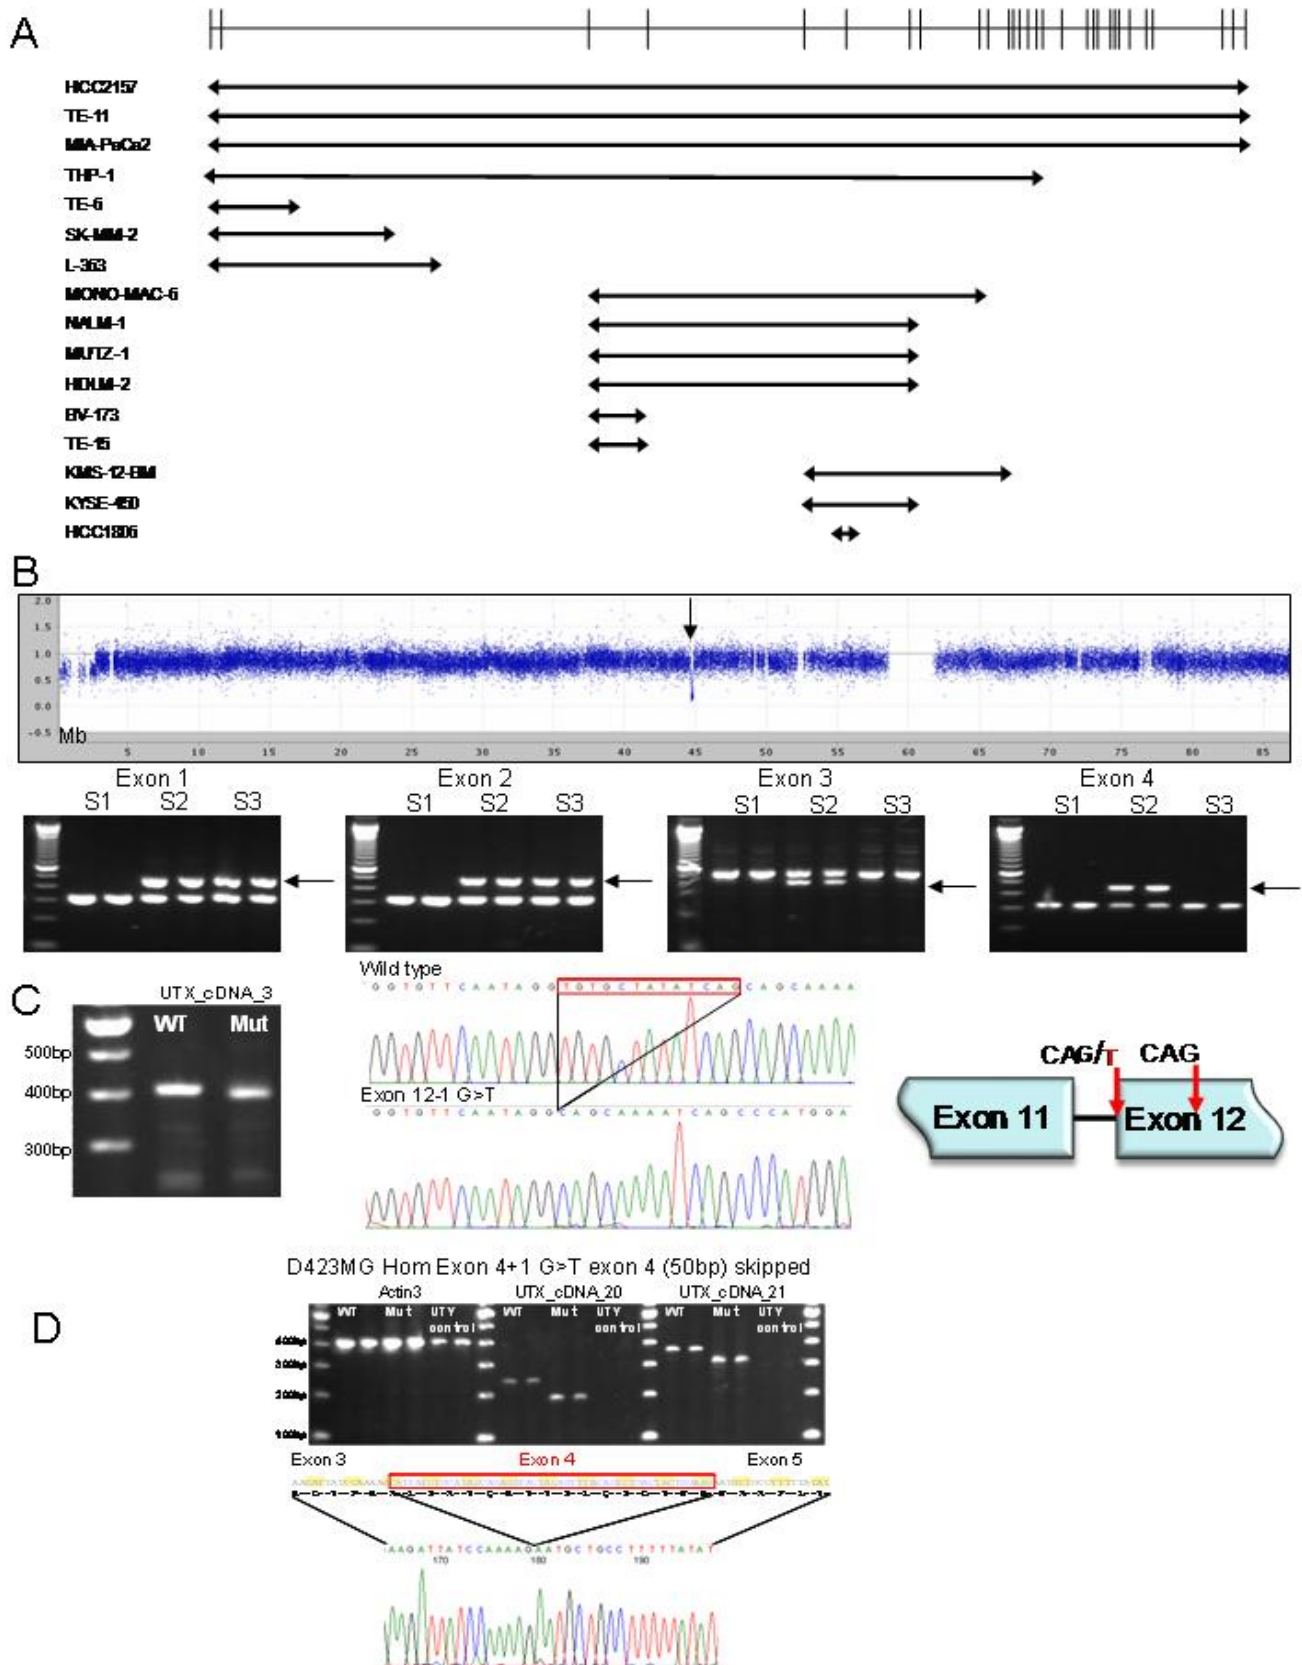

Supplementary Table 1 - Cancer Cell Lines Screened

| Cell line name | age at diagnosis | sex | Histology                            | Histology Subtype |
|----------------|------------------|-----|--------------------------------------|-------------------|
| RS4-11         | 32               | f   | acute_leukaemia                      |                   |
| KY821          | 28               | m   | acute_leukaemia_of_ambiguous_lineage |                   |
| MV-4-11        | 10               | m   | acute_leukaemia_of_ambiguous_lineage |                   |
| BALL-1         |                  | u   | acute_lymphoblastic_B_cell_leukaemia |                   |
| MHH-CALL-2     | 15               | f   | acute_lymphoblastic_B_cell_leukaemia |                   |
| MHH-CALL-4     | 10               | m   | acute_lymphoblastic_B_cell_leukaemia |                   |
| MHH-PREB-1     | 5                | m   | acute_lymphoblastic_B_cell_leukaemia |                   |
| MN-60          | 20               | m   | acute_lymphoblastic_B_cell_leukaemia |                   |
| NALM-6         | 19               | m   | acute_lymphoblastic_B_cell_leukaemia |                   |
| REH            | 15               | f   | acute_lymphoblastic_B_cell_leukaemia |                   |
| SUP-B8         |                  | u   | acute_lymphoblastic_B_cell_leukaemia |                   |
| U-698-M        | 7                | m   | acute_lymphoblastic_B_cell_leukaemia |                   |
| 380            | 15               | m   | acute_lymphoblastic_leukaemia        |                   |
| 697            | 12               | m   | acute_lymphoblastic_leukaemia        |                   |
| ALL-PO         | 0.33             | f   | acute_lymphoblastic_leukaemia        |                   |
| BE-13          | 11               | f   | acute_lymphoblastic_leukaemia        |                   |
| CCRF-CEM       | 4                | f   | acute_lymphoblastic_leukaemia        |                   |
| GR-ST          | 10               | m   | acute_lymphoblastic_leukaemia        |                   |
| HAL-01         | 17               | f   | acute_lymphoblastic_leukaemia        |                   |
| KARPAS-45      | 2                | m   | acute_lymphoblastic_leukaemia        |                   |
| KE-37          | 27               | m   | acute_lymphoblastic_leukaemia        |                   |
| LC4-1          | 13               | f   | acute_lymphoblastic_leukaemia        |                   |
| MOLT-4         | 19               | m   | acute_lymphoblastic_leukaemia        |                   |
| P30-OHK        | 11               | f   | acute_lymphoblastic_leukaemia        |                   |
| ATN-1          | 47               | m   | acute_lymphoblastic_T_cell_leukaemia |                   |
| J-RT3-T3-5     | 14               | m   | acute_lymphoblastic_T_cell_leukaemia |                   |
| LOUCY          | 38               | f   | acute_lymphoblastic_T_cell_leukaemia |                   |
| MOLT-13        | 2                | f   | acute_lymphoblastic_T_cell_leukaemia |                   |
| MOLT-16        | 5                | f   | acute_lymphoblastic_T_cell_leukaemia |                   |
| P12-ICHIKAWA   | 7                | m   | acute_lymphoblastic_T_cell_leukaemia |                   |
| PF-382         | 6                | f   | acute_lymphoblastic_T_cell_leukaemia |                   |
| RPMI-8402      | 16               | f   | acute_lymphoblastic_T_cell_leukaemia |                   |
| SUP-T1         | 8                | m   | acute_lymphoblastic_T_cell_leukaemia |                   |
| TALL-1         | 28               | m   | acute_lymphoblastic_T_cell_leukaemia |                   |
| AML-193        | 13               | f   | acute_myeloid_leukaemia              |                   |
| CESS           |                  | u   | acute_myeloid_leukaemia              |                   |
| CMK            | 0.8              | m   | acute_myeloid_leukaemia              |                   |
| CTV-1          | 40               | f   | acute_myeloid_leukaemia              |                   |
| GDM-1          | 66               | f   | acute_myeloid_leukaemia              |                   |
| HEL            |                  | u   | acute_myeloid_leukaemia              |                   |
| HL-60          | 36               | f   | acute_myeloid_leukaemia              |                   |
| K052           | 46               | m   | acute_myeloid_leukaemia              |                   |
| KASUMI-1       | 7                | m   | acute_myeloid_leukaemia              |                   |

|            |    |   |                                 |  |
|------------|----|---|---------------------------------|--|
| KG-1       | 59 | m | acute_myeloid_leukaemia         |  |
| KMOE-2     | 2  | f | acute_myeloid_leukaemia         |  |
| MC-1010    | 25 | m | acute_myeloid_leukaemia         |  |
| ML-2       | 26 | m | acute_myeloid_leukaemia         |  |
| MONO-MAC-6 | 64 | m | acute_myeloid_leukaemia         |  |
| NB4        | 23 | f | acute_myeloid_leukaemia         |  |
| NKM-1      |    | u | acute_myeloid_leukaemia         |  |
| NOMO-1     |    | u | acute_myeloid_leukaemia         |  |
| OCI-AML2   | 65 | m | acute_myeloid_leukaemia         |  |
| P31-FUJ    |    | u | acute_myeloid_leukaemia         |  |
| QIMR-WIL   |    | u | acute_myeloid_leukaemia         |  |
| SIG-M5     | 63 | m | acute_myeloid_leukaemia         |  |
| THP-1      | 1  | m | acute_myeloid_leukaemia         |  |
| NCI-H295   | 48 | f | adrenal_cortical_carcinoma      |  |
| SW13       | 55 | f | adrenal_cortical_carcinoma      |  |
| C8166      |    | u | adult_T_cell_lymphoma-leukaemia |  |
| HH         | 61 | m | adult_T_cell_lymphoma-leukaemia |  |
| KARPAS-299 | 25 | m | anaplastic_large_cell_lymphoma  |  |
| SU-DHL-1   | 10 | m | anaplastic_large_cell_lymphoma  |  |
| B2-17      | 75 | m | astrocytoma                     |  |
| MOG-G-CCM  |    | u | astrocytoma                     |  |
| MOG-G-UVW  |    | u | astrocytoma                     |  |
| SF126      |    | u | astrocytoma                     |  |
| SK-MG-1    |    | u | astrocytoma                     |  |
| SW1088     | 72 | m | astrocytoma                     |  |
| KINGS-1    |    | m | astrocytoma_Grade_III           |  |
| no-10      | 62 | m | astrocytoma_Grade_III           |  |
| no-11      | 64 | f | astrocytoma_Grade_III           |  |
| SW1783     | 68 | m | astrocytoma_Grade_III           |  |
| BC-1       | 46 | m | B_cell_lymphoma_unspecified     |  |
| BC-3       | 85 | m | B_cell_lymphoma_unspecified     |  |
| CRO-AP2    | 49 | m | B_cell_lymphoma_unspecified     |  |
| CRO-AP5    | 35 | m | B_cell_lymphoma_unspecified     |  |
| CTB-1      | 70 | m | B_cell_lymphoma_unspecified     |  |
| HT         | 70 | m | B_cell_lymphoma_unspecified     |  |
| MC116      |    | m | B_cell_lymphoma_unspecified     |  |
| RL         | 52 | m | B_cell_lymphoma_unspecified     |  |
| SCC-3      | 20 | f | B_cell_lymphoma_unspecified     |  |
| TUR        | 37 | m | B_cell_lymphoma_unspecified     |  |
| 5637       | 68 | m | bladder_ca_NS                   |  |
| DSH1       |    |   | bladder_ca_NS                   |  |
| J82        |    |   | bladder_ca_NS                   |  |
| LB831-BLC  | 64 | m | bladder_ca_NS                   |  |
| RT4        | 63 | m | bladder_squamous_cell_ca        |  |
| 639-V      | 69 | m | bladder_transitional_cell_ca    |  |
| 647-V      |    | u | bladder_transitional_cell_ca    |  |
| BFTC-905   | 51 | f | bladder_transitional_cell_ca    |  |

|          |    |   |                                       |  |
|----------|----|---|---------------------------------------|--|
| HT-1197  | 44 | m | bladder_transitional_cell_ca          |  |
| HT-1376  | 58 | f | bladder_transitional_cell_ca          |  |
| KU-19-19 | 76 | m | bladder_transitional_cell_ca          |  |
| RT-112   |    | f | bladder_transitional_cell_ca          |  |
| SW1710   | 84 | f | bladder_transitional_cell_ca          |  |
| SW780    | 80 | f | bladder_transitional_cell_ca          |  |
| T-24     | 81 | f | bladder_transitional_cell_ca          |  |
| TCCSUP   | 67 | f | bladder_transitional_cell_ca          |  |
| UM-UC-3  |    | m | bladder_transitional_cell_ca          |  |
| VM-CUB-1 |    | m | bladder_transitional_cell_ca          |  |
| BV-173   | 45 | m | blast_phase_chronic_myeloid_leukaemia |  |
| CML-T1   | 36 | f | blast_phase_chronic_myeloid_leukaemia |  |
| EM-2     | 5  | f | blast_phase_chronic_myeloid_leukaemia |  |
| LAMA-84  | 29 | f | blast_phase_chronic_myeloid_leukaemia |  |
| MEG-01   | 55 | m | blast_phase_chronic_myeloid_leukaemia |  |
| NALM-1   | 3  | f | blast_phase_chronic_myeloid_leukaemia |  |
| SJSA-1   | 19 | m | bone_NS                               |  |
| AU565    | 43 | f | Breast_ca                             |  |
| BT-20    | 74 | f | Breast_ca                             |  |
| BT-474   | 60 | f | Breast_ca                             |  |
| BT-549   | 72 | f | Breast_ca                             |  |
| CAL-120  | 43 | f | Breast_ca                             |  |
| CAL-148  | 58 | f | Breast_ca                             |  |
| CAL-51   | 45 | f | Breast_ca                             |  |
| CAL-85-1 | 35 | f | Breast_ca                             |  |
| CAMA-1   | 51 | f | Breast_ca                             |  |
| COLO-824 | 52 | m | Breast_ca                             |  |
| DU-4475  | 62 | f | Breast_ca                             |  |
| EFM-19   | 50 | f | Breast_ca                             |  |
| EVSA-T   |    | f | Breast_ca                             |  |
| HCC1143  | 52 | f | Breast_ca                             |  |
| HCC1187  | 41 | f | Breast_ca                             |  |
| HCC1395  | 43 | f | Breast_ca                             |  |
| HCC1419  | 42 | f | Breast_ca                             |  |
| HCC1569  | 70 | f | Breast_ca                             |  |
| HCC1599  | 44 | f | Breast_ca                             |  |
| HCC1806  | 60 | f | Breast_ca                             |  |
| HCC1937  | 23 | f | Breast_ca                             |  |
| HCC1954  | 61 | f | Breast_ca                             |  |
| HCC2157  | 48 | f | Breast_ca                             |  |
| HCC2218  | 38 | f | Breast_ca                             |  |

|                |    |   |                  |  |
|----------------|----|---|------------------|--|
| HCC38          | 50 | f | Breast_ca        |  |
| HCC70          | 49 | f | Breast_ca        |  |
| Hs-578-T       | 74 | f | Breast_ca        |  |
| MCF7           | 69 | u | Breast_ca        |  |
| MDA-MB-134-VI  | 47 | f | Breast_ca        |  |
| MDA-MB-157     |    | f | Breast_ca        |  |
| MDA-MB-175-VII | 56 | f | Breast_ca        |  |
| MDA-MB-231     | 51 | f | Breast_ca        |  |
| MDA-MB-361     | 40 | f | Breast_ca        |  |
| MDA-MB-415     | 38 | f | Breast_ca        |  |
| MDA-MB-435     |    | f | Breast_ca        |  |
| MDA-MB-453     | 48 | f | Breast_ca        |  |
| MDA-MB-468     | 51 | f | Breast_ca        |  |
| MFM-223        |    | f | Breast_ca        |  |
| MRK-nu-1       | 46 | f | Breast_ca        |  |
| NCI-ADR-RES    |    | u | Breast_ca        |  |
| OCUB-M         | 53 | f | Breast_ca        |  |
| T47D           | 54 | f | Breast_ca        |  |
| UACC-812       | 43 | f | Breast_ca        |  |
| UACC-893       | 57 | f | Breast_ca        |  |
| ZR-75-30       | 47 | f | Breast_ca        |  |
| BL-41          | 8  | m | Burkitt_lymphoma |  |
| BL-70          | 16 | m | Burkitt_lymphoma |  |
| CA46           |    | m | Burkitt_lymphoma |  |
| Daudi          | 16 | m | Burkitt_lymphoma |  |
| DG-75          | 10 | m | Burkitt_lymphoma |  |
| EB2            | 7  | f | Burkitt_lymphoma |  |
| EB-3           | 3  | m | Burkitt_lymphoma |  |
| GA-10-Clone-20 | 41 | m | Burkitt_lymphoma |  |
| GA-10-Clone-4  | 41 | m | Burkitt_lymphoma |  |
| JiyoyeP-2003   |    | m | Burkitt_lymphoma |  |
| Raji           | 11 | m | Burkitt_lymphoma |  |
| Ramos-2G6-4C10 | 3  | m | Burkitt_lymphoma |  |
| ST486          |    | f | Burkitt_lymphoma |  |
| TE-161-T       | 11 | m | Burkitt_lymphoma |  |
| BOKU           |    | f | cervical_ca      |  |
| C-33-A         | 66 | f | cervical_ca      |  |
| C-4-II         | 41 | f | cervical_ca      |  |
| Ca-Ski         | 40 | f | cervical_ca      |  |
| DoTc2-4510     |    | f | cervical_ca      |  |
| HeLaSF         | 31 | f | cervical_ca      |  |
| HT-3           | 58 | f | cervical_ca      |  |
| ME-180         | 66 | f | cervical_ca      |  |
| OMC-1          | 52 | f | cervical_ca      |  |
| SiHa           | 55 | f | cervical_ca      |  |
| SKG-IIIa       |    | f | cervical_ca      |  |
| SW756          | 46 | f | cervical_ca      |  |



|              |    |   |                                                           |  |
|--------------|----|---|-----------------------------------------------------------|--|
| TC-YIK       | 31 | f | cervical_ca                                               |  |
| EGI-1        | 52 | m | cholangiocarcinoma                                        |  |
| ETK-1        |    | f | cholangiocarcinoma                                        |  |
| HuCC1        |    | u | cholangiocarcinoma                                        |  |
| HuH-28       |    | u | cholangiocarcinoma                                        |  |
| TGBC24TKB    |    | f | cholangiocarcinoma                                        |  |
| H-EMC-SS     | 77 | f | chondrosarcoma                                            |  |
| JAR          | 24 | f | choriocarcinoma                                           |  |
| JEG-3        |    | f | choriocarcinoma                                           |  |
| SCH          | 46 | m | choriocarcinoma                                           |  |
| EoL-1-cell   | 33 | m | chronic_eosinophilic_leukaemia-hypereosinophilic_syndrome |  |
| EHEB         | 69 | f | chronic_lymphocytic_leukaemia-small_lymphocytic_lymphoma  |  |
| JVM-2        | 63 | f | chronic_lymphocytic_leukaemia-small_lymphocytic_lymphoma  |  |
| JVM-3        | 73 | m | chronic_lymphocytic_leukaemia-small_lymphocytic_lymphoma  |  |
| K-562        | 53 | f | chronic_myeloid_leukaemia                                 |  |
| KU812        |    | m | chronic_myeloid_leukaemia                                 |  |
| RPMI-8866    | 51 | f | chronic_myeloid_leukaemia                                 |  |
| C2BBe1       | 72 | m | colorectal_carcinoma                                      |  |
| CaR-1        |    | u | colorectal_carcinoma                                      |  |
| CoCM-1       |    | u | colorectal_carcinoma                                      |  |
| COLO-205     | 70 | m | colorectal_carcinoma                                      |  |
| COLO-320-HSR | 55 | m | colorectal_carcinoma                                      |  |
| COLO-678     | 69 | m | colorectal_carcinoma                                      |  |
| COLO-741     | 69 | f | colorectal_carcinoma                                      |  |
| CW-2         | 55 | f | colorectal_carcinoma                                      |  |
| Gp2D         | 71 | f | colorectal_carcinoma                                      |  |
| GP5d         | 71 | f | colorectal_carcinoma                                      |  |
| HCC2998      |    | u | colorectal_carcinoma                                      |  |
| HCT-116      |    | m | colorectal_carcinoma                                      |  |
| HCT-15       |    | m | colorectal_carcinoma                                      |  |
| HT-29        | 44 | f | colorectal_carcinoma                                      |  |
| HT55         |    | u | colorectal_carcinoma                                      |  |
| KM12         |    | u | colorectal_carcinoma                                      |  |
| LoVo         | 56 | m | colorectal_carcinoma                                      |  |
| LS-1034      | 54 | m | colorectal_carcinoma                                      |  |
| LS-123       | 65 | f | colorectal_carcinoma                                      |  |
| LS-174T      | 58 | f | colorectal_carcinoma                                      |  |
| LS-411N      | 32 | m | colorectal_carcinoma                                      |  |
| LS-513       | 63 | m | colorectal_carcinoma                                      |  |
| NCI-H508     | 55 | m | colorectal_carcinoma                                      |  |
| NCI-H630     | 60 | m | colorectal_carcinoma                                      |  |
| NCI-H716     | 33 | m | colorectal_carcinoma                                      |  |
| NCI-H747     | 69 | m | colorectal_carcinoma                                      |  |

|            |    |   |                               |  |
|------------|----|---|-------------------------------|--|
| RCM-1      |    | u | colorectal_carcinoma          |  |
| RKO        |    | u | colorectal_carcinoma          |  |
| SK-CO-1    | 65 | m | colorectal_carcinoma          |  |
| SNU-C1     | 71 | m | colorectal_carcinoma          |  |
| SNU-C2B    | 43 | f | colorectal_carcinoma          |  |
| SW1116     | 73 | m | colorectal_carcinoma          |  |
| SW1417     | 53 | f | colorectal_carcinoma          |  |
| SW1463     | 66 | f | colorectal_carcinoma          |  |
| SW403      | 51 | m | colorectal_carcinoma          |  |
| SW48       | 82 | f | colorectal_carcinoma          |  |
| SW620      | 51 | m | colorectal_carcinoma          |  |
| SW837      | 53 | m | colorectal_carcinoma          |  |
| SW948      | 81 | f | colorectal_carcinoma          |  |
| T84        | 72 | m | colorectal_carcinoma          |  |
| DB         | 45 | m | diffuse_large_B_cell_lymphoma |  |
| DOHH-2     | 60 | m | diffuse_large_B_cell_lymphoma |  |
| KARPAS-422 | 73 | f | diffuse_large_B_cell_lymphoma |  |
| HUTU-80    | 53 | m | duodenal_ca                   |  |
| AN3-CA     | 55 | f | endometrial_ca                |  |
| COLO-684   | 63 | f | endometrial_ca                |  |
| EFE-184    | 69 | f | endometrial_ca                |  |
| ESS-1      | 76 | f | endometrial_ca                |  |
| HEC-1      |    | f | endometrial_ca                |  |
| KLE        | 64 | f | endometrial_ca                |  |
| MFE-280    | 77 | f | endometrial_ca                |  |
| MFE-296    | 68 | f | endometrial_ca                |  |
| RL95-2     | 65 | f | endometrial_ca                |  |
| SNG-M      | 52 | f | endometrial_ca                |  |
| VA-ES-BJ   | 43 | m | epithelioid_sarcoma           |  |
| CADO-ES1   | 19 | f | Ewings_sarcoma                |  |
| ES1        | 5  | f | Ewings_sarcoma                |  |
| ES3        | 12 | m | Ewings_sarcoma                |  |
| ES4        | 18 | m | Ewings_sarcoma                |  |
| ES5        | 16 | m | Ewings_sarcoma                |  |
| ES6        | 17 | m | Ewings_sarcoma                |  |
| ES7        | 15 | m | Ewings_sarcoma                |  |
| ES8        | 10 | m | Ewings_sarcoma                |  |
| EW-1       | 19 | m | Ewings_sarcoma                |  |
| EW-11      | 11 | f | Ewings_sarcoma                |  |
| EW-12      | 16 | f | Ewings_sarcoma                |  |
| EW-13      |    | u | Ewings_sarcoma                |  |
| EW-16      |    | u | Ewings_sarcoma                |  |
| EW-18      |    | u | Ewings_sarcoma                |  |
| EW-22      |    | u | Ewings_sarcoma                |  |
| EW-24      |    | u | Ewings_sarcoma                |  |
| EW-3       | 14 | m | Ewings_sarcoma                |  |
| EW-7       | 20 | f | Ewings_sarcoma                |  |

|            |    |   |                              |  |
|------------|----|---|------------------------------|--|
| MHH-ES-1   | 12 | m | Ewings_sarcoma               |  |
| SK-PN-DW   | 17 | m | Ewings_sarcoma               |  |
| HT-1080    | 35 | m | fibrosarcoma                 |  |
| SW684      | 68 | m | fibrosarcoma                 |  |
| WSU-NHL    | 46 | f | follicular_lymphoma          |  |
| TGBC1TKB   |    | f | gallbladder_ca               |  |
| 23132-87   | 72 | m | gastric_ca                   |  |
| A3-KAW     | 68 | f | gastric_ca                   |  |
| AGS        | 54 | f | gastric_ca                   |  |
| ECC10      |    | u | gastric_ca                   |  |
| ECC12      | 63 | m | gastric_ca                   |  |
| GCIY       |    | f | gastric_ca                   |  |
| GT3TKB     | 53 | m | gastric_ca                   |  |
| HGC-27     |    | u | gastric_ca                   |  |
| KATOIII    | 55 | m | gastric_ca                   |  |
| MKN1       | 72 | m | gastric_ca                   |  |
| MKN28      | 70 | f | gastric_ca                   |  |
| MKN45      | 62 | f | gastric_ca                   |  |
| MKN7       | 39 | m | gastric_ca                   |  |
| NCI-N87    |    | m | gastric_ca                   |  |
| NCI-SNU-1  | 44 | m | gastric_ca                   |  |
| NCI-SNU-16 | 33 | f | gastric_ca                   |  |
| NCI-SNU-5  | 22 | f | gastric_ca                   |  |
| NUGC-3     | 72 | m | gastric_ca                   |  |
| RF-48      | 62 | m | gastric_ca                   |  |
| TGBC11TKB  | 72 | f | gastric_ca                   |  |
| ECC4       | 45 | m | gastrointestinal_tract_ca_NS |  |
| 8-MG-BA    | 54 | f | glioblastoma                 |  |
| A172       | 53 | m | glioblastoma                 |  |
| AM-38      | 36 | m | glioblastoma                 |  |
| Becker     | 57 | m | glioblastoma                 |  |
| CAS-1      | 63 | m | glioblastoma                 |  |
| CCF-STTG1  | 68 | f | glioblastoma                 |  |
| D-245MG    |    | u | glioblastoma                 |  |
| D-247MG    |    | u | glioblastoma                 |  |
| D-263MG    |    | u | glioblastoma                 |  |
| D-336MG    |    | u | glioblastoma                 |  |
| D-392MG    |    | u | glioblastoma                 |  |
| D-397MG    |    | u | glioblastoma                 |  |
| D-423MG    |    | u | glioblastoma                 |  |
| D-502MG    |    | u | glioblastoma                 |  |
| D-538MG    |    | u | glioblastoma                 |  |
| D-566MG    |    | u | glioblastoma                 |  |
| DBTRG-05MG | 59 | f | glioblastoma                 |  |
| DK-MG      | 67 | f | glioblastoma                 |  |
| GB-1       | 35 | m | glioblastoma                 |  |
| GMS-10     | 49 | m | glioblastoma                 |  |

|              |    |   |                          |                       |
|--------------|----|---|--------------------------|-----------------------|
| KS-1         |    | f | glioblastoma             |                       |
| LN-405       | 62 | f | glioblastoma             |                       |
| M059J        | 33 | m | glioblastoma             |                       |
| SNB19        | 47 | m | glioblastoma             |                       |
| T98G         | 61 | m | glioblastoma             |                       |
| U-118-MG     | 50 | m | glioblastoma             |                       |
| U-87-MG      | 44 | f | glioblastoma             |                       |
| YH-13        | 40 | m | glioblastoma             |                       |
| YKG-1        | 53 | f | glioblastoma             |                       |
| D-542MG      |    |   | glioma_NS                |                       |
| GAMG         | 42 | f | glioma_NS                |                       |
| H4           | 37 | m | glioma_NS                |                       |
| KALS-1       |    | f | glioma_NS                |                       |
| KNS-42       | 16 | m | glioma_NS                |                       |
| KNS-81-FD    | 65 | m | glioma_NS                |                       |
| NMC-G1       |    | u | glioma_NS                |                       |
| SF268        |    | u | glioma_NS                |                       |
| SF295        |    | u | glioma_NS                |                       |
| SF539        |    | u | glioma_NS                |                       |
| SNB75        |    | u | glioma_NS                |                       |
| U251         |    | u | glioma_NS                |                       |
| GI-1         | 61 | m | gliosarcoma              |                       |
| KGN          | 69 | f | granulosa_cell_tumour_ov | granulosa_cell_tumour |
| BONNA-12     | 46 | m | hairy_cell_leukaemia     |                       |
| HC-1         | 56 | m | hairy_cell_leukaemia     |                       |
| MLMA         | 32 | f | hairy_cell_leukaemia     |                       |
| Mo-T         |    | u | hairy_cell_leukaemia     |                       |
| C3A          | 15 | m | hepatocellular_carcinoma |                       |
| HLE          | 68 | m | hepatocellular_carcinoma |                       |
| HUH-6-clone5 | 57 | m | hepatocellular_carcinoma |                       |
| HuH-7        | 57 | m | hepatocellular_carcinoma |                       |
| PLC-PRF-5    |    | u | hepatocellular_carcinoma |                       |
| SK-HEP-1     | 52 | m | hepatocellular_carcinoma |                       |
| SNU-387      | 41 | f | hepatocellular_carcinoma |                       |
| SNU-423      | 40 | m | hepatocellular_carcinoma |                       |
| SNU-449      | 52 | m | hepatocellular_carcinoma |                       |
| SNU-475      | 43 | m | hepatocellular_carcinoma |                       |
| BB30-HNC     |    | f | HNSCC                    | NS                    |
| BB49-HNC     | 70 | f | HNSCC                    | NS                    |
| BHY          | 52 | m | HNSCC                    | NS                    |
| Ca9-22       |    | m | HNSCC                    | gingiva               |
| CAL-27       | 56 | m | HNSCC                    | tongue                |
| CAL-33       | 69 | m | HNSCC                    | tongue                |
| Detroit562   |    | f | HNSCC                    | pharynx               |
| DOK          | 57 | m | HNSCC                    | tongue                |
| FADU         | 56 | m | HNSCC                    | hypopharynx           |
| HCE-T        | 49 | f | HNSCC                    | sinus                 |

|            |      |   |                                                        |                            |
|------------|------|---|--------------------------------------------------------|----------------------------|
| HN         | 60   | m | HNSCC                                                  | mouth_roof                 |
| HO-1-N-1   |      | u | HNSCC                                                  | buccal_mucosa              |
| HSC-2      | 69   | m | HNSCC                                                  | mouth                      |
| HSC-3      | 64   | m | HNSCC                                                  | tongue                     |
| HSC-4      | 64   | m | HNSCC                                                  | tongue                     |
| KOSC-2     | 51   | m | HNSCC                                                  | mouth_floor                |
| LB771-HNC  | 49   | m | HNSCC                                                  | NS                         |
| RPMI-2650  |      | u | HNSCC                                                  | sinonasal_and_nasal_cavity |
| SAS        |      | u | HNSCC                                                  | tongue                     |
| SCC-15     | 55   | m | HNSCC                                                  | tongue                     |
| SCC-25     | 70   | m | HNSCC                                                  | tongue                     |
| SCC-4      | 55   | m | HNSCC                                                  | tongue                     |
| SCC-9      | 25   | m | HNSCC                                                  | tongue                     |
| HDLM-2     | 74   | m | Hodgkin_lymphoma                                       |                            |
| HD-MY-Z    | 29   | u | Hodgkin_lymphoma                                       |                            |
| KM-H2      | 37   | m | Hodgkin_lymphoma                                       |                            |
| L-428      | 37   | f | Hodgkin_lymphoma                                       |                            |
| L-540      | 20   | f | Hodgkin_lymphoma                                       |                            |
| RPMI-6666  | 29   | m | Hodgkin_lymphoma                                       |                            |
| G-402      | 0.75 | f | leiomyoblastoma                                        |                            |
| SK-UT-1    | 75   | f | leiomyosarcoma                                         |                            |
| SW872      | 36   | m | liposarcoma                                            |                            |
| NCI-H720   |      | u | lung_carcinoid                                         | atypical                   |
| NCI-H727   | 65   | f | lung_carcinoid                                         |                            |
| NCI-H835   | 48   | f | lung_carcinoid                                         |                            |
| SR         | 11   | m | lymphoma                                               |                            |
| DEL        | 12   | m | lymphoma_NS                                            |                            |
| GCT        | 29   | m | malignant_fibrous_histiocytoma-<br>pleomorphic_sarcoma |                            |
| MFH-ino    |      | f | malignant_fibrous_histiocytoma-<br>pleomorphic_sarcoma |                            |
| A101D      | 56   | m | malignant_melanoma                                     |                            |
| A2058      | 43   | m | malignant_melanoma                                     |                            |
| A375       | 54   | f | malignant_melanoma                                     |                            |
| A4-Fuk     | 52   | f | malignant_melanoma                                     |                            |
| C32        | 53   | m | malignant_melanoma                                     |                            |
| CHL-1      |      | u | malignant_melanoma                                     |                            |
| COLO-679   | 47   | f | malignant_melanoma                                     |                            |
| COLO-792   | 62   | m | malignant_melanoma                                     |                            |
| COLO-800   | 14   | m | malignant_melanoma                                     |                            |
| COLO-829   | 45   | m | malignant_melanoma                                     |                            |
| CP50-MEL-B | 54   | m | malignant_melanoma                                     |                            |
| CP66-MEL   |      | m | malignant_melanoma                                     |                            |
| CP67-MEL   |      | u | malignant_melanoma                                     |                            |
| G-361      | 31   | m | malignant_melanoma                                     |                            |
| GAK        | 86   | f | malignant_melanoma                                     |                            |
| HMV-II     | 65   | f | malignant_melanoma                                     |                            |

|             |     |   |                             |  |
|-------------|-----|---|-----------------------------|--|
| HT-144      | 29  | m | malignant_melanoma          |  |
| IGR-1       | 42  | m | malignant_melanoma          |  |
| IPC-298     | 64  | f | malignant_melanoma          |  |
| IST-MEL1    |     | m | malignant_melanoma          |  |
| LB2518-MEL  | 57  | f | malignant_melanoma          |  |
| LB373-MEL-D | 32  | f | malignant_melanoma          |  |
| LOXIMVI     |     | u | malignant_melanoma          |  |
| M14         |     | u | malignant_melanoma          |  |
| Malme-3M    | 43  | m | malignant_melanoma          |  |
| MEL-HO      |     | f | malignant_melanoma          |  |
| MEL-JUSO    | 58  | f | malignant_melanoma          |  |
| Mewo        |     | u | malignant_melanoma          |  |
| MMAC-SF     | 39  | f | malignant_melanoma          |  |
| MZ2-MEL.    |     | u | malignant_melanoma          |  |
| MZ7-mel     |     |   | malignant_melanoma          |  |
| RPMI-7951   | 18  | f | malignant_melanoma          |  |
| RVH-421     | 28  | m | malignant_melanoma          |  |
| SH-4        | 60  | f | malignant_melanoma          |  |
| SK-MEL-1    | 29  | m | malignant_melanoma          |  |
| SK-MEL-2    | 60  | m | malignant_melanoma          |  |
| SK-MEL-24   | 67  | m | malignant_melanoma          |  |
| SK-MEL-28   | 51  | m | malignant_melanoma          |  |
| SK-MEL-3    | 42  | f | malignant_melanoma          |  |
| SK-MEL-30   | 67  | m | malignant_melanoma          |  |
| SK-MEL-5    | 24  | f | malignant_melanoma          |  |
| UACC-257    |     | u | malignant_melanoma          |  |
| UACC-62     |     | u | malignant_melanoma          |  |
| VMRC-MELG   |     | u | malignant_melanoma          |  |
| WM-115      | 58  | f | malignant_melanoma          |  |
| DJM-1       | 87  | f | malignant_trichilemmal_cyst |  |
| D-283MED    | 6   | m | medulloblastoma             |  |
| D-384MED    |     | u | medulloblastoma             |  |
| D-458MED    |     | u | medulloblastoma             |  |
| D-556MED    |     | u | medulloblastoma             |  |
| Daoy        | 4   | m | medulloblastoma             |  |
| ONS-76      | 2   | f | medulloblastoma             |  |
| PFSK-1      | 1.8 | m | medulloblastoma             |  |
| IST-MES1    | 70  | f | mesothelioma                |  |
| MPP-89      | 67  | m | mesothelioma                |  |
| MSTO-211H   | 62  | m | mesothelioma                |  |
| NCI-H2052   | 65  | m | mesothelioma                |  |
| NCI-H2452   |     | m | mesothelioma                |  |
| NCI-H28     | 48  | m | mesothelioma                |  |
| ARH-77      | 33  | f | mutiple myeloma             |  |
| IM-9        |     | f | mutiple myeloma             |  |
| KMS-12-PE   |     |   | mutiple myeloma             |  |
| L-363       | 36  | f | mutiple myeloma             |  |

|              |      |   |                                   |  |
|--------------|------|---|-----------------------------------|--|
| LP-1         | 56   | f | mutiple myeloma                   |  |
| OPM-2        | 56   | f | mutiple myeloma                   |  |
| RPMI-8226    | 61   | m | mutiple myeloma                   |  |
| SK-MM-2      | 54   | m | mutiple myeloma                   |  |
| U-266        | 53   | m | mutiple myeloma                   |  |
| H9           | 53   | m | mycosis_fungoides-Sezary_syndrome |  |
| MJ           | 50   | m | mycosis_fungoides-Sezary_syndrome |  |
| MUTZ-1       | 5    | f | myelodysplastic_syndrome          |  |
| SKM-1        | 76   | m | myelodysplastic_syndrome          |  |
| ACN          |      | u | neuroblastoma                     |  |
| CHP-126      | 1.2  | f | neuroblastoma                     |  |
| CHP-134      | 1.08 | u | neuroblastoma                     |  |
| CHP-212      |      | u | neuroblastoma                     |  |
| GI-ME-N      | 2    | f | neuroblastoma                     |  |
| GOTO         |      | u | neuroblastoma                     |  |
| GOTO-P3      | 1    | m | neuroblastoma                     |  |
| IMR-5        |      | u | neuroblastoma                     |  |
| KP-N-RT-BM-1 |      | u | neuroblastoma                     |  |
| KP-N-S19s    |      | u | neuroblastoma                     |  |
| KP-N-YN      |      | u | neuroblastoma                     |  |
| KP-N-YS      | 4    | u | neuroblastoma                     |  |
| LAN-1        |      |   | neuroblastoma                     |  |
| LAN-5        |      | u | neuroblastoma                     |  |
| LAN-6        | 5.8  | m | neuroblastoma                     |  |
| MC-IXC       | 14   | f | neuroblastoma                     |  |
| MHH-NB-11    | 4    | m | neuroblastoma                     |  |
| NB1          | 2    | m | neuroblastoma                     |  |
| NB10         | 2    | m | neuroblastoma                     |  |
| NB12         | 0.1  | f | neuroblastoma                     |  |
| NB13         | 1    | m | neuroblastoma                     |  |
| NB14         | 1    | f | neuroblastoma                     |  |
| NB16         | 2.9  | u | neuroblastoma                     |  |
| NB17         | 1    | f | neuroblastoma                     |  |
| NB5          | 2    | f | neuroblastoma                     |  |
| NB6          |      | m | neuroblastoma                     |  |
| NB69         | 1.3  | m | neuroblastoma                     |  |
| NB7          | 0.07 | m | neuroblastoma                     |  |
| NBsusSR      | 18   | m | neuroblastoma                     |  |
| NH-12        | 1.25 | m | neuroblastoma                     |  |
| NH-6         | 0.75 | f | neuroblastoma                     |  |
| SCCH-26      |      | u | neuroblastoma                     |  |
| SIMA         | 1.66 | m | neuroblastoma                     |  |
| SK-N-AS      | 6    | f | neuroblastoma                     |  |
| SK-N-DZ      | 2    | f | neuroblastoma                     |  |
| SK-N-FI      | 11   | m | neuroblastoma                     |  |
| TGW          |      | u | neuroblastoma                     |  |
| YT           | 15   | m | NK-T_cell_lymphoma                |  |

|            |    |   |       |                                   |
|------------|----|---|-------|-----------------------------------|
| A427       | 52 | m | NSCLC |                                   |
| A549       | 58 | m | NSCLC |                                   |
| ABC-1      | 47 | m | NSCLC | adenocarcinoma                    |
| BEN        | 71 | m | NSCLC |                                   |
| CAL-12T    |    |   | NSCLC |                                   |
| Calu-1     | 47 | m | NSCLC | mucoepidermoid_carcinoma          |
| Calu-3     | 25 | m | NSCLC | adenocarcinoma                    |
| Calu-6     | 61 | f | NSCLC | adenocarcinoma                    |
| ChaGo-K-1  | 45 | m | NSCLC |                                   |
| COR-L105   |    | u | NSCLC | adenocarcinoma                    |
| COR-L23    | 62 | m | NSCLC | large_cell_carcinoma              |
| DV-90      | 50 | m | NSCLC | adenocarcinoma                    |
| EKVX       |    | u | NSCLC | adenocarcinoma                    |
| EPLC-272H  | 57 | m | NSCLC | squamous_cell_carcinoma           |
| HOP-62     |    | u | NSCLC | adenocarcinoma                    |
| HOP-92     |    | u | NSCLC | large_cell_carcinoma              |
| IA-LM      | 68 | m | NSCLC | large_cell_carcinoma              |
| KNS-62     | 49 | m | NSCLC | squamous_cell_carcinoma           |
| LC-1F      | 69 | m | NSCLC | squamous_cell_carcinoma           |
| LC-2-ad    | 51 | f | NSCLC | adenocarcinoma                    |
| LCLC-103H  | 61 | m | NSCLC | large_cell_carcinoma              |
| LCLC-97TM1 | 44 | m | NSCLC | large_cell_carcinoma              |
| LK-2       | 74 | m | NSCLC | squamous_cell_carcinoma           |
| LU-65      | 64 | m | NSCLC | giant_cell_carcinoma              |
| LU-99A     | 63 | m | NSCLC | lung_giant_cell_carcinoma         |
| LXF-289    | 63 | m | NSCLC | adenocarcinoma                    |
| NCI-H1155  | 36 | m | NSCLC | large_cell_carcinoma              |
| NCI-H1299  | 43 | m | NSCLC | large_cell_carcinoma              |
| NCI-H1355  | 53 | m | NSCLC | adenocarcinoma                    |
| NCI-H1395  | 55 | f | NSCLC | adenocarcinoma                    |
| NCI-H1437  | 60 | m | NSCLC | adenocarcinoma                    |
| NCI-H1563  |    | m | NSCLC | adenocarcinoma                    |
| NCI-H157   |    | m | NSCLC | squamous_cell_carcinoma           |
| NCI-H1573  | 35 | f | NSCLC | adenocarcinoma                    |
| NCI-H1581  | 44 | m | NSCLC | large_cell_carcinoma              |
| NCI-H1623  | 58 | m | NSCLC | adenocarcinoma                    |
| NCI-H1648  | 39 | m | NSCLC | adenocarcinoma                    |
| NCI-H1650  | 27 | m | NSCLC | bronchioloalveolar_adenocarcinoma |
| NCI-H1651  | 71 | m | NSCLC | adenocarcinoma                    |
| NCI-H1666  | 50 | f | NSCLC | bronchioloalveolar_adenocarcinoma |
| NCI-H1693  | 55 | f | NSCLC | adenocarcinoma                    |
| NCI-H1703  | 54 | m | NSCLC | mixed_adenosquamous_carcinoma     |
| NCI-H1734  | 56 | f | NSCLC | adenocarcinoma                    |
| NCI-H1755  | 65 | f | NSCLC | adenocarcinoma                    |
| NCI-H1770  | 57 | m | NSCLC |                                   |
| NCI-H1792  | 50 | m | NSCLC | adenocarcinoma                    |
| NCI-H1793  | 52 | f | NSCLC | adenocarcinoma                    |



|            |    |   |                |                                   |
|------------|----|---|----------------|-----------------------------------|
| NCI-H1838  |    | f | NSCLC          | adenocarcinoma                    |
| NCI-H1926  | 27 | m | NSCLC          | lung small_cell_carcinoma         |
| NCI-H1975  |    | f | NSCLC          | adenocarcinoma                    |
| NCI-H1993  | 47 | f | NSCLC          | adenocarcinoma                    |
| NCI-H2009  | 58 | f | NSCLC          | adenocarcinoma                    |
| NCI-H2030  |    | m | NSCLC          | adenocarcinoma                    |
| NCI-H2087  | 69 | m | NSCLC          | adenocarcinoma                    |
| NCI-H2122  | 46 | f | NSCLC          | adenocarcinoma                    |
| NCI-H2126  | 65 | m | NSCLC          | adenocarcinoma                    |
| NCI-H2170  |    | m | NSCLC          | squamous_cell_carcinoma           |
| NCI-H2228  |    |   | NSCLC          | adenocarcinoma                    |
| NCI-H226   |    | m | NSCLC          | squamous_cell_carcinoma           |
| NCI-H2291  |    | m | NSCLC          | adenocarcinoma                    |
| NCI-H23    | 51 | m | NSCLC          |                                   |
| NCI-H2342  | 55 | m | NSCLC          | adenocarcinoma                    |
| NCI-H2347  | 54 | f | NSCLC          |                                   |
| NCI-H2405  | 47 | m | NSCLC          | adenocarcinoma                    |
| NCI-H292   | 32 | f | NSCLC          | mucoepidermoid_carcinoma          |
| NCI-H322M  | 52 | m | NSCLC          | bronchioloalveolar_adenocarcinoma |
| NCI-H358   |    | m | NSCLC          | bronchioloalveolar_adenocarcinoma |
| NCI-H441   |    | m | NSCLC          | bronchioloalveolar_adenocarcinoma |
| NCI-H460   |    | m | NSCLC          | large_cell_carcinoma              |
| NCI-H520   |    | m | NSCLC          | squamous_cell_carcinoma           |
| NCI-H522   | 60 | m | NSCLC          |                                   |
| NCI-H596   | 73 | m | NSCLC          | mixed_adenosquamous_carcinoma     |
| NCI-H650   |    | m | NSCLC          | bronchioloalveolar_adenocarcinoma |
| NCI-H661   | 43 | m | NSCLC          | large_cell_carcinoma              |
| NCI-H810   | 51 | m | NSCLC          | large_cell_carcinoma              |
| NCI-H838   |    | u | NSCLC          |                                   |
| PC-14      |    |   | NSCLC          | adenocarcinoma                    |
| RERF-LC-MS |    | u | NSCLC          | adenocarcinoma                    |
| SK-LU-1    | 60 | f | NSCLC          | adenocarcinoma                    |
| SK-MES-1   | 65 | m | NSCLC          | squamous_cell_carcinoma           |
| SW1573     | 44 | f | NSCLC          | adenocarcinoma                    |
| SW900      | 53 | m | NSCLC          | squamous_cell_carcinoma           |
| UMC-11     |    | u | NSCLC          |                                   |
| VMRC-LCP   |    | u | NSCLC          | squamous_cell_carcinoma           |
| COLO-680N  | 57 | f | oesophagus_SCC |                                   |
| EC-GI-10   | 65 | m | oesophagus_SCC |                                   |
| HCE-4      |    |   | oesophagus_SCC |                                   |
| KYSE-140   | 54 | m | oesophagus_SCC |                                   |
| KYSE-150   | 49 | f | oesophagus_SCC |                                   |
| KYSE-180   | 53 | m | oesophagus_SCC |                                   |
| KYSE-270   | 79 | m | oesophagus_SCC |                                   |
| KYSE-410   | 51 | m | oesophagus_SCC |                                   |
| KYSE-450   | 59 | m | oesophagus_SCC |                                   |
| KYSE-510   | 67 | f | oesophagus_SCC |                                   |

|           |    |   |                      |                                 |
|-----------|----|---|----------------------|---------------------------------|
| KYSE-520  | 58 | f | oesophagus_SCC       |                                 |
| KYSE-70   | 77 | m | oesophagus_SCC       |                                 |
| OE19      | 72 | m | oesophagus_SCC       |                                 |
| OE33      | 73 | f | oesophagus_SCC       |                                 |
| TE-1      |    |   | oesophagus_SCC       |                                 |
| TE-10     |    |   | oesophagus_SCC       |                                 |
| TE-11     |    | u | oesophagus_SCC       |                                 |
| TE-12     |    | u | oesophagus_SCC       |                                 |
| TE-15     |    |   | oesophagus_SCC       |                                 |
| TE-5      | 73 | f | oesophagus_SCC       |                                 |
| TE-6      |    | u | oesophagus_SCC       |                                 |
| TE-8      |    |   | oesophagus_SCC       |                                 |
| TE-9      |    | u | oesophagus_SCC       |                                 |
| CAL-72    | 10 | m | osteosarcoma         |                                 |
| HOS       | 13 | f | osteosarcoma         |                                 |
| HuO-3N1   | 15 | f | osteosarcoma         |                                 |
| HuO9      | 13 | f | osteosarcoma         |                                 |
| MG-63     | 14 | m | osteosarcoma         |                                 |
| NOS-1     | 16 | m | osteosarcoma         |                                 |
| NY        |    | u | osteosarcoma         |                                 |
| Saos-2    | 11 | f | osteosarcoma         |                                 |
| TI-73     |    | u | osteosarcoma         |                                 |
| U-2-OS    | 15 | f | osteosarcoma         |                                 |
| A2780     |    | f | ovarian_ca           | adenocarcinoma                  |
| Caov-3    | 54 | f | ovarian_ca           | adenocarcinoma                  |
| Caov-4    | 45 | f | ovarian_ca           | adenocarcinoma                  |
| EFO-21    | 56 | f | ovarian_ca           | serous_carcinoma                |
| EFO-27    | 36 | f | ovarian_ca           | mucinous_carcinoma              |
| KURAMOCHI |    | f | ovarian_ca           | undifferentiated_carcinoma      |
| OAW-42    |    | f | ovarian_ca           | mucinous_carcinoma              |
| OC-314    | 39 | f | ovarian_ca           | serous_micropapillary_carcinoma |
| OVCAR-3   | 60 | f | ovarian_ca           | adenocarcinoma                  |
| RMG-I     |    | f | ovarian_ca           | clear_cell_carcinoma            |
| RTSG      | 66 | f | ovarian_ca           | adenocarcinoma                  |
| SK-OV-3   | 64 | f | ovarian_ca           | adenocarcinoma                  |
| SW626     | 46 | f | ovarian_ca           | adenocarcinoma                  |
| TYK-nu    |    | f | ovarian_ca           | undifferentiated_carcinoma      |
| IGROV-1   |    | f | ovarian_ca_NS        |                                 |
| OAW-28    |    | f | ovarian_ca_NS        |                                 |
| OVCAR-4   |    | f | ovarian_ca_NS        |                                 |
| OVCAR-5   |    | f | ovarian_ca_NS        |                                 |
| OVCAR-8   |    | f | ovarian_ca_NS        |                                 |
| AsPC-1    | 62 | f | pancreatic_ductal_ca |                                 |
| BxPC-3    | 61 | f | pancreatic_ductal_ca |                                 |
| CAPAN-1   | 40 | m | pancreatic_ductal_ca |                                 |
| Capan-2   | 56 | m | pancreatic_ductal_ca |                                 |
| CFPAC-1   | 26 | m | pancreatic_ductal_ca |                                 |

|                 |    |   |                            |  |
|-----------------|----|---|----------------------------|--|
| HPAF-II         | 44 | m | pancreatic_ductal_ca       |  |
| HuP-T3          | 66 | m | pancreatic_ductal_ca       |  |
| HuP-T4          | 60 | m | pancreatic_ductal_ca       |  |
| KP-4            | 50 | m | pancreatic_ductal_ca       |  |
| MIA-PaCa-2      | 65 | m | pancreatic_ductal_ca       |  |
| MZ1-PC          |    |   | pancreatic_ductal_ca       |  |
| PANC-03-27      | 65 | f | pancreatic_ductal_ca       |  |
| PANC-08-13      | 85 | m | pancreatic_ductal_ca       |  |
| PANC-10-05      |    | m | pancreatic_ductal_ca       |  |
| PSN1            |    | u | pancreatic_ductal_ca       |  |
| SW1990          | 56 | m | pancreatic_ductal_ca       |  |
| YAPC            | 43 | m | pancreatic_ductal_ca       |  |
| MC-CAR          | 81 | m | plasmacytoma               |  |
| 22RV1           |    | m | prostate_ca                |  |
| BPH-1           | 68 | m | prostate_ca                |  |
| DU-145          | 69 | m | prostate_ca                |  |
| LNCaP-Clone-FGC | 50 | m | prostate_ca                |  |
| PC-3            | 62 | m | prostate_ca                |  |
| A498            | 52 | f | renal_ca_NS                |  |
| BFTC-909        | 64 | m | renal_ca_NS                |  |
| 769-P           | 63 | f | renal_clear_cell_carcinoma |  |
| 786-0           | 58 | m | renal_clear_cell_carcinoma |  |
| A704            | 78 | m | renal_clear_cell_carcinoma |  |
| ACHN            | 22 | m | renal_clear_cell_carcinoma |  |
| BB65-RCC        | 60 | m | renal_clear_cell_carcinoma |  |
| CAKI-1          | 49 | m | renal_clear_cell_carcinoma |  |
| CAL-54          | 75 | m | renal_clear_cell_carcinoma |  |
| HA7-RCC         |    | m | renal_clear_cell_carcinoma |  |
| LB1047-RCC      | 49 | f | renal_clear_cell_carcinoma |  |
| LB2241-RCC      |    | m | renal_clear_cell_carcinoma |  |
| LB996-RCC       | 67 | m | renal_clear_cell_carcinoma |  |
| OS-RC-2         |    | m | renal_clear_cell_carcinoma |  |
| RCC10RGB        |    | m | renal_clear_cell_carcinoma |  |
| RXF393          |    | u | renal_clear_cell_carcinoma |  |
| SN12C           |    | u | renal_clear_cell_carcinoma |  |
| TK10            |    | u | renal_clear_cell_carcinoma |  |
| U031            |    | u | renal_clear_cell_carcinoma |  |
| VMRC-RCZ        |    | u | renal_clear_cell_carcinoma |  |
| WERI-Rb-1       | 1  | f | retinoblastoma             |  |
| A204            | 1  | f | rhabdomyosarcoma           |  |
| A673            | 15 | f | rhabdomyosarcoma           |  |
| RD              | 7  | f | rhabdomyosarcoma           |  |
| RH-1            |    | m | rhabdomyosarcoma           |  |
| RH-18           | 2  | f | rhabdomyosarcoma           |  |
| SJRH30          | 17 | m | rhabdomyosarcoma           |  |
| TE-441-T        | 14 | f | rhabdomyosarcoma           |  |
| A253            | 54 | m | salivary_mucoepidermoid_ca |  |

|            |    |   |            |  |
|------------|----|---|------------|--|
| MES-SA     | 56 | f | sarcoma_NS |  |
| S-117      | 47 | f | sarcoma_NS |  |
| SK-LMS-1   | 43 | f | sarcoma_NS |  |
| COLO-668   | 47 | f | SCLC       |  |
| COR-L279   | 63 | m | SCLC       |  |
| COR-L51    | 71 | m | SCLC       |  |
| COR-L88    | 55 | m | SCLC       |  |
| COR-L96CAR |    | u | SCLC       |  |
| CPC-N      |    |   | SCLC       |  |
| DMS-114    | 68 | m | SCLC       |  |
| DMS-153    | 44 | m | SCLC       |  |
| DMS-273    | 50 | f | SCLC       |  |
| DMS-53     | 54 | m | SCLC       |  |
| DMS-79     | 65 | u | SCLC       |  |
| IST-SL1    |    | m | SCLC       |  |
| IST-SL2    |    | m | SCLC       |  |
| LB647-SCLC | 48 | m | SCLC       |  |
| LU-134-A   | 80 | m | SCLC       |  |
| LU-135     | 69 | m | SCLC       |  |
| LU-139     | 63 | m | SCLC       |  |
| LU-165     | 50 | m | SCLC       |  |
| MS-1       |    |   | SCLC       |  |
| NCI-H1048  |    | f | SCLC       |  |
| NCI-H1092  | 67 | m | SCLC       |  |
| NCI-H1105  | 73 | m | SCLC       |  |
| NCI-H1173  |    |   | SCLC       |  |
| NCI-H128   | 60 | m | SCLC       |  |
| NCI-H1284  |    |   | SCLC       |  |
| NCI-H1304  | 56 | f | SCLC       |  |
| NCI-H1417  | 61 | f | SCLC       |  |
| NCI-H1436  | 39 | m | SCLC       |  |
| NCI-H146   | 59 | m | SCLC       |  |
| NCI-H1522  | 53 | m | SCLC       |  |
| NCI-H1618  | 55 | f | SCLC       |  |
| NCI-H1694  | 61 | m | SCLC       |  |
| NCI-H187   | 47 | m | SCLC       |  |
| NCI-H1882  |    |   | SCLC       |  |
| NCI-H1930  | 41 | m | SCLC       |  |
| NCI-H1963  | 56 | m | SCLC       |  |
| NCI-H2029  | 69 | f | SCLC       |  |
| NCI-H2081  | 59 | f | SCLC       |  |
| NCI-H209   |    | m | SCLC       |  |
| NCI-H2107  | 36 | m | SCLC       |  |
| NCI-H2141  | 58 | m | SCLC       |  |
| NCI-H2171  | 50 | m | SCLC       |  |
| NCI-H2196  | 67 | m | SCLC       |  |
| NCI-H2227  | 54 | m | SCLC       |  |

|               |      |   |                             |  |
|---------------|------|---|-----------------------------|--|
| NCI-H2330     | 57   | f | SCLC                        |  |
| NCI-H250      | 34   | m | SCLC                        |  |
| NCI-H345      | 64   | m | SCLC                        |  |
| NCI-H378      | 66   | f | SCLC                        |  |
| NCI-H446      | 61   | m | SCLC                        |  |
| NCI-H510A     | 56   | m | SCLC                        |  |
| NCI-H524      | 63   | m | SCLC                        |  |
| NCI-H526      | 55   | m | SCLC                        |  |
| NCI-H64       |      |   | SCLC                        |  |
| NCI-H69       | 55   | m | SCLC                        |  |
| NCI-H711      | 49   | m | SCLC                        |  |
| NCI-H719      | 55   | f | SCLC                        |  |
| NCI-H748      | 62   | m | SCLC                        |  |
| NCI-H774      | 43   | m | SCLC                        |  |
| NCI-H82       | 40   | m | SCLC                        |  |
| NCI-H889      | 69   | f | SCLC                        |  |
| NCI-N417      |      | f | SCLC                        |  |
| RERF-LC-FM    |      | u | SCLC                        |  |
| SBC-1         | 46   | m | SCLC                        |  |
| SBC-5         |      |   | SCLC                        |  |
| SCLC-21H      | 46   | m | SCLC                        |  |
| SHP-77        | 54   | m | SCLC                        |  |
| A431          | 85   | f | skin_SCC                    |  |
| SW982         | 25   | f | synovial_sarcoma            |  |
| PA-1          | 12   | f | teratoma_ovarian            |  |
| ITO-II        |      | m | testicular_germ_cell_tumour |  |
| NCCIT         |      | m | testicular_germ_cell_tumour |  |
| NEC8          | 24   | m | testicular_germ_cell_tumour |  |
| NTERA-S-cl-D1 | 22   | m | testicular_germ_cell_tumour |  |
| 8305C         | 67   | f | thyroid_anaplastic_ca       |  |
| 8505C         | 78   | f | thyroid_anaplastic_ca       |  |
| BHT-101       | 63   | f | thyroid_anaplastic_ca       |  |
| CAL-62        | 70   | f | thyroid_anaplastic_ca       |  |
| HTC-C3        | 44   | f | thyroid_ca_NS               |  |
| TCO-1         |      | u | thyroid_ca_NS               |  |
| CGTH-W-1      | 70   | f | thyroid_follicular_ca       |  |
| FTC-133       | 42   | m | thyroid_follicular_ca       |  |
| K5            |      | u | thyroid_follicular_ca       |  |
| RO82-W-1      |      | u | thyroid_follicular_ca       |  |
| TT            |      | u | thyroid_medullary_ca        |  |
| BCPAP         |      | u | thyroid_papillary_ca        |  |
| A388          | 86   | m | unknown                     |  |
| TE-206-T      | 1    | m | unknown                     |  |
| CAL-39        | 76   | f | vulva_SCC                   |  |
| SW954         | 86   | f | vulva_SCC                   |  |
| SW962         | 64   | f | vulva_SCC                   |  |
| G-401         | 0.25 | m | Wilms_tumour                |  |

|          |    |   |              |  |
|----------|----|---|--------------|--|
| SK-NEP-1 | 25 | f | Wilms_tumour |  |
|----------|----|---|--------------|--|

Supplementary Table 2 - Clinical Samples Screened

| Tumour  | Sex | Age | Histology                  |
|---------|-----|-----|----------------------------|
| PD1579a | F   | 47  | Renal clear cell carcinoma |
| PD1580a | F   | 61  | Renal clear cell carcinoma |
| PD1582a | F   | 47  | Renal clear cell carcinoma |
| PD1590a | M   | 64  | Renal clear cell carcinoma |
| PD1593a | M   | 59  | Renal clear cell carcinoma |
| PD1753a | M   | 67  | Renal clear cell carcinoma |
| PD1754a | F   | 42  | Renal clear cell carcinoma |
| PD1759a | M   | 76  | Renal clear cell carcinoma |
| PD1764a | M   | 41  | Renal clear cell carcinoma |
| PD1766a | F   | 85  | Renal clear cell carcinoma |
| PD1767a | F   | 80  | Renal clear cell carcinoma |
| PD1768a | M   | 73  | Renal clear cell carcinoma |
| PD1769a | M   | 43  | Renal clear cell carcinoma |
| PD2125a | M   | 82  | Renal clear cell carcinoma |
| PD2126a | F   | 74  | Renal clear cell carcinoma |
| PD2127a | F   | 59  | Renal clear cell carcinoma |
| PD2129a | M   | 75  | Renal clear cell carcinoma |
| PD2130a | F   | 67  | Renal clear cell carcinoma |
| PD2131a | F   | 63  | Renal clear cell carcinoma |
| PD2132a | F   | 63  | Renal clear cell carcinoma |
| PD2133a | M   | 52  | Renal clear cell carcinoma |
| PD2134a | F   | 83  | Renal clear cell carcinoma |
| PD2135a | M   | 73  | Renal clear cell carcinoma |
| PD2136a | M   | 67  | Renal clear cell carcinoma |
| PD2138a | M   | 74  | Renal clear cell carcinoma |
| PD2139a | F   | 62  | Renal clear cell carcinoma |
| PD2140a | M   | 48  | Renal clear cell carcinoma |
| PD2141a | F   | 57  | Renal clear cell carcinoma |
| PD2142a | M   | 49  | Renal clear cell carcinoma |
| PD2145a | M   | 63  | Renal clear cell carcinoma |
| PD2146a | M   | 64  | Renal clear cell carcinoma |
| PD2147a | F   | 50  | Renal clear cell carcinoma |
| PD2148a | F   | 77  | Renal clear cell carcinoma |
| PD2149a | M   | 66  | Renal clear cell carcinoma |
| PD2150a | M   | 78  | Renal clear cell carcinoma |
| PD2152a | M   | 84  | Renal clear cell carcinoma |

|         |   |    |                            |
|---------|---|----|----------------------------|
| PD2153a | M | 48 | Renal clear cell carcinoma |
| PD2154a | F | 64 | Renal clear cell carcinoma |
| PD2155a | M | 50 | Renal clear cell carcinoma |
| PD2156a | M | 58 | Renal clear cell carcinoma |
| PD2157a | M | 32 | Renal clear cell carcinoma |
| PD2158a | M | 52 | Renal clear cell carcinoma |
| PD2160a | M | 73 | Renal clear cell carcinoma |
| PD2161a | F | 42 | Renal clear cell carcinoma |
| PD2162a | M | 57 | Renal clear cell carcinoma |
| PD2163a | M | 54 | Renal clear cell carcinoma |
| PD2164a | F | 56 | Renal clear cell carcinoma |
| PD2166a | F | 44 | Renal clear cell carcinoma |
| PD2167a | M | 59 | Renal clear cell carcinoma |
| PD2168a | M | 53 | Renal clear cell carcinoma |
| PD2170a | M | 60 | Renal clear cell carcinoma |
| PD2171a | F | 52 | Renal clear cell carcinoma |
| PD2172a | M | 67 | Renal clear cell carcinoma |
| PD2173a | F | 83 | Renal clear cell carcinoma |
| PD2174a | F | 65 | Renal clear cell carcinoma |
| PD2175a | F | 64 | Renal clear cell carcinoma |
| PD2176a | M | 62 | Renal clear cell carcinoma |
| PD2177a | M | 49 | Renal clear cell carcinoma |
| PD2178a | F | 62 | Renal clear cell carcinoma |
| PD2180a | F | 45 | Renal clear cell carcinoma |
| PD2181a | F | 71 | Renal clear cell carcinoma |
| PD2182a | F | 46 | Renal clear cell carcinoma |
| PD2183a | F | 66 | Renal clear cell carcinoma |
| PD2184a | F | 78 | Renal clear cell carcinoma |
| PD2185a | F | 71 | Renal clear cell carcinoma |
| PD2186a | M | 50 | Renal clear cell carcinoma |
| PD2187a | F | 49 | Renal clear cell carcinoma |
| PD2188a | M | 67 | Renal clear cell carcinoma |
| PD2189a | M | 57 | Renal clear cell carcinoma |
| PD2190a | F | 61 | Renal clear cell carcinoma |
| PD2191a | M | 68 | Renal clear cell carcinoma |
| PD2192a | M | 78 | Renal clear cell carcinoma |
| PD2193a | M | 61 | Renal clear cell carcinoma |



|         |   |    |                            |
|---------|---|----|----------------------------|
| PD2194a | M | 74 | Renal clear cell carcinoma |
| PD2197a | F | 65 | Renal clear cell carcinoma |
| PD2198a | M | 70 | Renal clear cell carcinoma |
| PD2199a | M | 58 | Renal clear cell carcinoma |
| PD2201a | M | 51 | Renal clear cell carcinoma |
| PD2202a | M | 82 | Renal clear cell carcinoma |
| PD2203a | F | 60 | Renal clear cell carcinoma |
| PD2204a | M | 56 | Renal clear cell carcinoma |
| PD2205a | M | 66 | Renal clear cell carcinoma |
| PD2207a | M | 66 | Renal clear cell carcinoma |
| PD2208a | F | 65 | Renal clear cell carcinoma |
| PD2209a | F | 69 | Renal clear cell carcinoma |
| PD2210a | M | 73 | Renal clear cell carcinoma |
| PD2211a | F | 51 | Renal clear cell carcinoma |
| PD2213a | M | 60 | Renal clear cell carcinoma |
| PD2214a | M | 53 | Renal clear cell carcinoma |
| PD2215a | M | 39 | Renal clear cell carcinoma |
| PD2216a | M | 62 | Renal clear cell carcinoma |
| PD2217a | M | 44 | Renal clear cell carcinoma |
| PD2218a | M | 77 | Renal clear cell carcinoma |
| PD2219a | M | 47 | Renal clear cell carcinoma |
| PD2221a | F | 48 | Renal clear cell carcinoma |
| PD2222a | F | 54 | Renal clear cell carcinoma |
| PD3284a | M | 56 | Renal clear cell carcinoma |
| PD3285a | F | 80 | Renal clear cell carcinoma |
| PD3286a | F | 71 | Renal clear cell carcinoma |
| PD3287a | M | 61 | Renal clear cell carcinoma |
| PD3288a | M | 56 | Renal clear cell carcinoma |
| PD3289a | M | 57 | Renal clear cell carcinoma |
| PD3290a | F | 58 | Renal clear cell carcinoma |
| PD3291a | M | 52 | Renal clear cell carcinoma |
| PD3292a | M | 76 | Renal clear cell carcinoma |
| PD3293a | M | 80 | Renal clear cell carcinoma |
| PD3294a | F | 60 | Renal clear cell carcinoma |
| PD3295a | M | 62 | Renal clear cell carcinoma |
| PD3296a | M | 72 | Renal clear cell carcinoma |
| PD3297a | F | 32 | Renal clear cell carcinoma |

|         |   |    |                            |
|---------|---|----|----------------------------|
| PD3298a | M | 64 | Renal clear cell carcinoma |
| PD3299a | F | 54 | Renal clear cell carcinoma |
| PD3300a | F | 49 | Renal clear cell carcinoma |
| PD3301a | M | 41 | Renal clear cell carcinoma |
| PD3302a | F | 53 | Renal clear cell carcinoma |
| PD3303a | F | 70 | Renal clear cell carcinoma |
| PD3304a | M | 64 | Renal clear cell carcinoma |
| PD3305a | F | 47 | Renal clear cell carcinoma |
| PD3306a | F | 80 | Renal clear cell carcinoma |
| PD3307a | F | 64 | Renal clear cell carcinoma |
| PD3308a | M | 43 | Renal clear cell carcinoma |
| PD3309a | M | 67 | Renal clear cell carcinoma |
| PD3310a | M | 52 | Renal clear cell carcinoma |
| PD3311a | M | 50 | Renal clear cell carcinoma |
| PD3312a | F | 81 | Renal clear cell carcinoma |
| PD3313a | F | 48 | Renal clear cell carcinoma |
| PD3314a | F | 58 | Renal clear cell carcinoma |
| PD3315a | M | 75 | Renal clear cell carcinoma |
| PD3316a | M | 44 | Renal clear cell carcinoma |
| PD3317a | M | 62 | Renal clear cell carcinoma |
| PD3318a | M | 74 | Renal clear cell carcinoma |
| PD3319a | F | 56 | Renal clear cell carcinoma |
| PD3320a | M | 60 | Renal clear cell carcinoma |
| PD3321a | F | 58 | Renal clear cell carcinoma |
| PD3322a | F | 83 | Renal clear cell carcinoma |
| PD3324a | M | 51 | Renal clear cell carcinoma |
| PD3325a | M | 57 | Renal clear cell carcinoma |
| PD3326a | M | 58 | Renal clear cell carcinoma |
| PD3327a | M | 56 | Renal clear cell carcinoma |
| PD3328a | F | 48 | Renal clear cell carcinoma |
| PD3329a | F | 77 | Renal clear cell carcinoma |
| PD3330a | M | 78 | Renal clear cell carcinoma |
| PD3331a | F | 64 | Renal clear cell carcinoma |
| PD3332a | M | 65 | Renal clear cell carcinoma |
| PD3333a | M | 44 | Renal clear cell carcinoma |
| PD3334a | M | 48 | Renal clear cell carcinoma |
| PD3335a | F | 71 | Renal clear cell carcinoma |

|         |   |    |                            |
|---------|---|----|----------------------------|
| PD3336a | F | 74 | Renal clear cell carcinoma |
| PD3337a | F | 71 | Renal clear cell carcinoma |
| PD3338a | M | 66 | Renal clear cell carcinoma |
| PD3339a | M | 49 | Renal clear cell carcinoma |
| PD3340a | M | 49 | Renal clear cell carcinoma |
| PD3341a | M | 37 | Renal clear cell carcinoma |
| PD3342a | M | 65 | Renal clear cell carcinoma |
| PD3343a | M | 69 | Renal clear cell carcinoma |
| PD3344a | F | 55 | Renal clear cell carcinoma |
| PD3345a | M | 57 | Renal clear cell carcinoma |
| PD3346a | F | 82 | Renal clear cell carcinoma |
| PD3347a | M | 68 | Renal clear cell carcinoma |
| PD3348a | M | 57 | Renal clear cell carcinoma |
| PD3349a | F | 56 | Renal clear cell carcinoma |
| PD3350a | M | 51 | Renal clear cell carcinoma |
| PD3351a | M | 65 | Renal clear cell carcinoma |
| PD3352a | F | 76 | Renal clear cell carcinoma |
| PD3353a | M | 66 | Renal clear cell carcinoma |
| PD3354a | M | 76 | Renal clear cell carcinoma |
| PD3355a | F | 59 | Renal clear cell carcinoma |
| PD3356a | M | 67 | Renal clear cell carcinoma |
| PD3357a | M | 71 | Renal clear cell carcinoma |
| PD3358a | M | 67 | Renal clear cell carcinoma |
| PD3359a | M | 72 | Renal clear cell carcinoma |
| PD3360a | F | 57 | Renal clear cell carcinoma |
| PD3361a | M | 72 | Renal clear cell carcinoma |
| PD3362a | M | 49 | Renal clear cell carcinoma |
| PD3363a | F | 72 | Renal clear cell carcinoma |
| PD3364a | M | 70 | Renal clear cell carcinoma |
| PD3365a | F | 54 | Renal clear cell carcinoma |
| PD3366a | F | 56 | Renal clear cell carcinoma |
| PD3367a | F | 69 | Renal clear cell carcinoma |
| PD3368a | M | 54 | Renal clear cell carcinoma |
| PD3369a | F | 71 | Renal clear cell carcinoma |
| PD3370a | F | 87 | Renal clear cell carcinoma |
| PD3371a | F | 56 | Renal clear cell carcinoma |
| PD3372a | F | 67 | Renal clear cell carcinoma |

|         |   |    |                            |
|---------|---|----|----------------------------|
| PD3373a | M | 57 | Renal clear cell carcinoma |
| PD3374a | M | 53 | Renal clear cell carcinoma |
| PD3375a | F | 57 | Renal clear cell carcinoma |
| PD3376a | F | 82 | Renal clear cell carcinoma |
| PD3377a | F | 50 | Renal clear cell carcinoma |
| PD3378a | F | 52 | Renal clear cell carcinoma |
| PD3379a | M | 62 | Renal clear cell carcinoma |
| PD3380a | F | 70 | Renal clear cell carcinoma |
| PD3381a | M | 66 | Renal clear cell carcinoma |
| PD3382a | M | 56 | Renal clear cell carcinoma |
| PD3383a | F | 82 | Renal clear cell carcinoma |
| PD3384a | M | 67 | Renal clear cell carcinoma |
| PD3385a | M | 71 | Renal clear cell carcinoma |
| PD3386a | F | 78 | Renal clear cell carcinoma |
| PD3387a | F | 77 | Renal clear cell carcinoma |
| PD3388a | F | 73 | Renal clear cell carcinoma |
| PD3389a | M | 48 | Renal clear cell carcinoma |
| PD3390a | F | 67 | Renal clear cell carcinoma |
| PD3391a | M | 54 | Renal clear cell carcinoma |
| PD3392a | M | 50 | Renal clear cell carcinoma |
| PD3393a | F | 54 | Renal clear cell carcinoma |
| PD3394a | M | 61 | Renal clear cell carcinoma |
| PD3395a | M | 74 | Renal clear cell carcinoma |
| PD3396a |   |    | Renal clear cell carcinoma |
| PD3397a |   | 47 | Renal clear cell carcinoma |
| PD3398a | M | 41 | Renal clear cell carcinoma |
| PD3399a | F | 58 | Renal clear cell carcinoma |
| PD3400a | M | 51 | Renal clear cell carcinoma |
| PD3401a | F | 70 | Renal clear cell carcinoma |
| PD3402a | M | 53 | Renal clear cell carcinoma |
| PD3403a | M | 63 | Renal clear cell carcinoma |
| PD3404a | F | 55 | Renal clear cell carcinoma |
| PD3405a | M | 55 | Renal clear cell carcinoma |
| PD3406a | M | 49 | Renal clear cell carcinoma |
| PD3407a | M | 54 | Renal clear cell carcinoma |
| PD3408a | F | 78 | Renal clear cell carcinoma |
| PD3409a | M | 69 | Renal clear cell carcinoma |

|         |   |    |                            |
|---------|---|----|----------------------------|
| PD3410a | F | 54 | Renal clear cell carcinoma |
| PD3411a | F | 58 | Renal clear cell carcinoma |
| PD3412a | F | 43 | Renal clear cell carcinoma |
| PD3413a | F | 51 | Renal clear cell carcinoma |
| PD3414a | M | 52 | Renal clear cell carcinoma |
| PD3415a | M | 65 | Renal clear cell carcinoma |
| PD3416a | M | 78 | Renal clear cell carcinoma |
| PD3417a | M | 59 | Renal clear cell carcinoma |
| PD3418a | M | 61 | Renal clear cell carcinoma |
| PD3419a | F | 67 | Renal clear cell carcinoma |
| PD3420a | M | 58 | Renal clear cell carcinoma |
| PD3421a | M | 65 | Renal clear cell carcinoma |
| PD3422a | M | 68 | Renal clear cell carcinoma |
| PD3423a | M | 61 | Renal clear cell carcinoma |
| PD3424a | M | 66 | Renal clear cell carcinoma |
| PD3425a | M | 48 | Renal clear cell carcinoma |
| PD3426a | M | 51 | Renal clear cell carcinoma |
| PD3427a | M | 50 | Renal clear cell carcinoma |
| PD3428a | F | 35 | Renal clear cell carcinoma |
| PD3429a | M | 51 | Renal clear cell carcinoma |
| PD3430a | F | 59 | Renal clear cell carcinoma |
| PD3431a | M | 63 | Renal clear cell carcinoma |
| PD3432a | M | 79 | Renal clear cell carcinoma |
| PD3433a | M | 47 | Renal clear cell carcinoma |
| PD3434a | M | 39 | Renal clear cell carcinoma |
| PD3435a | M | 68 | Renal clear cell carcinoma |
| PD3436a | M | 38 | Renal clear cell carcinoma |
| PD3437a | F | 68 | Renal clear cell carcinoma |
| PD3438a | M | 51 | Renal clear cell carcinoma |
| PD3439a | M | 59 | Renal clear cell carcinoma |
| PD3440a | M | 70 | Renal clear cell carcinoma |
| PD3441a | M | 69 | Renal clear cell carcinoma |
| PD3442a | M | 73 | Renal clear cell carcinoma |
| PD3443a | F | 48 | Renal clear cell carcinoma |
| PD3444a | M | 75 | Renal clear cell carcinoma |
| PD3445a | F | 55 | Renal clear cell carcinoma |
| PD3446a | M | 72 | Renal clear cell carcinoma |

|         |   |    |                            |
|---------|---|----|----------------------------|
| PD3447a | F | 53 | Renal clear cell carcinoma |
| PD3448a | M | 85 | Renal clear cell carcinoma |
| PD3450a | M | 68 | Renal clear cell carcinoma |
| PD3451a | M | 71 | Renal clear cell carcinoma |
| PD3453a | F | 64 | Renal clear cell carcinoma |
| PD3454a | M | 70 | Renal clear cell carcinoma |
| PD3455a | F | 42 | Renal clear cell carcinoma |
| PD3456a | M | 36 | Renal clear cell carcinoma |
| PD3457a | M | 39 | Renal clear cell carcinoma |
| PD3458a | F | 69 | Renal clear cell carcinoma |
| PD3459a | F | 52 | Renal clear cell carcinoma |
| PD3460a | M | 67 | Renal clear cell carcinoma |
| PD3461a | M | 67 | Renal clear cell carcinoma |
| PD3462a | M | 88 | Renal clear cell carcinoma |
| PD3463a | M | 59 | Renal clear cell carcinoma |
| PD3464a | F | 83 | Renal clear cell carcinoma |
| PD3465a | M | 54 | Renal clear cell carcinoma |
| PD3466a | F | 44 | Renal clear cell carcinoma |
| PD3467a | F | 72 | Renal clear cell carcinoma |
| PD3469a | F | 85 | Renal clear cell carcinoma |
| PD3470a | F | 58 | Renal clear cell carcinoma |
| PD3471a | F | 57 | Renal clear cell carcinoma |
| PD3472a | M | 66 | Renal clear cell carcinoma |
| PD3473a | F | 73 | Renal clear cell carcinoma |
| PD3474a | M | 62 | Renal clear cell carcinoma |
| PD3475a | M | 69 | Renal clear cell carcinoma |
| PD3476a | F | 46 | Renal clear cell carcinoma |
| PD3478a | M | 56 | Renal clear cell carcinoma |
| PD3479a | M | 76 | Renal clear cell carcinoma |
| PD3480a | M | 48 | Renal clear cell carcinoma |
| PD3481a | F | 80 | Renal clear cell carcinoma |
| PD3482a | M | 55 | Renal clear cell carcinoma |
| PD3483a | M | 67 | Renal clear cell carcinoma |
| PD3484a | M | 72 | Renal clear cell carcinoma |
| PD3485a | M | 69 | Renal clear cell carcinoma |
| PD3486a | M | 70 | Renal clear cell carcinoma |
| PD3487a | M | 44 | Renal clear cell carcinoma |

|         |   |    |                            |
|---------|---|----|----------------------------|
| PD3488a | F | 69 | Renal clear cell carcinoma |
| PD3489a | F | 58 | Renal clear cell carcinoma |
| PD3490a | F | 59 | Renal clear cell carcinoma |
| PD3491a | M | 87 | Renal clear cell carcinoma |
| PD3492a | M | 42 | Renal clear cell carcinoma |
| PD3493a | F | 78 | Renal clear cell carcinoma |
| PD3494a | M | 42 | Renal clear cell carcinoma |
| PD3495a | M | 71 | Renal clear cell carcinoma |
| PD3496a | M | 64 | Renal clear cell carcinoma |
| PD3497a | M | 63 | Renal clear cell carcinoma |
| PD3498a | F | 38 | Renal clear cell carcinoma |
| PD3499a | M | 55 | Renal clear cell carcinoma |
| PD3500a | M | 49 | Renal clear cell carcinoma |
| PD3501a | F | 83 | Renal clear cell carcinoma |
| PD3502a | M | 84 | Renal clear cell carcinoma |
| PD3503a | M | 60 | Renal clear cell carcinoma |
| PD3504a | F | 37 | Renal clear cell carcinoma |
| PD3505a | M | 54 | Renal clear cell carcinoma |
| PD3506a | F | 62 | Renal clear cell carcinoma |
| PD3507a | M | 57 | Renal clear cell carcinoma |
| PD3508a | F | 71 | Renal clear cell carcinoma |
| PD3509a | M | 58 | Renal clear cell carcinoma |
| PD3510a | F | 89 | Renal clear cell carcinoma |
| PD3511a | F | 58 | Renal clear cell carcinoma |
| PD3512a | M | 83 | Renal clear cell carcinoma |
| PD3513a | M | 69 | Renal clear cell carcinoma |
| PD3514a | F | 43 | Renal clear cell carcinoma |
| PD3515a | M | 80 | Renal clear cell carcinoma |
| PD3516a | F | 68 | Renal clear cell carcinoma |
| PD3517a | F | 63 | Renal clear cell carcinoma |
| PD3518a | M | 74 | Renal clear cell carcinoma |
| PD3519a | F | 85 | Renal clear cell carcinoma |
| PD3520a | M | 64 | Renal clear cell carcinoma |
| PD3521a | M | 54 | Renal clear cell carcinoma |
| PD3522a | M | 64 | Renal clear cell carcinoma |
| PD3523a | F | 47 | Renal clear cell carcinoma |
| PD3524a | M | 66 | Renal clear cell carcinoma |

|         |   |    |                            |
|---------|---|----|----------------------------|
| PD3525a | F | 74 | Renal clear cell carcinoma |
| PD3526a | M | 59 | Renal clear cell carcinoma |
| PD3527a | F | 66 | Renal clear cell carcinoma |
| PD3528a | F | 50 | Renal clear cell carcinoma |
| PD3529a | M | 56 | Renal clear cell carcinoma |
| PD3530a | M | 69 | Renal clear cell carcinoma |
| PD3532a | M | 41 | Renal clear cell carcinoma |
| PD3533a | M | 69 | Renal clear cell carcinoma |
| PD3534a | M | 55 | Renal clear cell carcinoma |
| PD3535a | F | 52 | Renal clear cell carcinoma |
| PD3537a | M | 62 | Renal clear cell carcinoma |
| PD3538a | M | 73 | Renal clear cell carcinoma |
| PD3539a | M | 78 | Renal clear cell carcinoma |
| PD3540a | F | 52 | Renal clear cell carcinoma |
| PD3541a | M | 61 | Renal clear cell carcinoma |
| PD3542a | F | 59 | Renal clear cell carcinoma |
| PD3543a | M | 55 | Renal clear cell carcinoma |
| PD3544a | F | 50 | Renal clear cell carcinoma |
| PD3545a | M | 54 | Renal clear cell carcinoma |
| PD3546a | F | 57 | Renal clear cell carcinoma |
| PD3547a | F | 63 | Renal clear cell carcinoma |
| PD3548a | M | 66 | Renal clear cell carcinoma |
| PD3549a | F | 56 | Renal clear cell carcinoma |
| PD3550a | M | 44 | Renal clear cell carcinoma |
| PD3551a | F | 69 | Renal clear cell carcinoma |
| PD3552a | M | 54 | Renal clear cell carcinoma |
| PD3553a | F | 75 | Renal clear cell carcinoma |
| PD3554a | F | 55 | Renal clear cell carcinoma |
| PD3555a | F | 66 | Renal clear cell carcinoma |
| PD3556a | M | 69 | Renal clear cell carcinoma |
| PD3557a | F | 49 | Renal clear cell carcinoma |
| PD3558a | M | 55 | Renal clear cell carcinoma |
| PD3559a | F | 74 | Renal clear cell carcinoma |
| PD3560a | F | 78 | Renal clear cell carcinoma |
| PD3561a | M | 72 | Renal clear cell carcinoma |
| PD3562a | F | 73 | Renal clear cell carcinoma |
| PD3563a | M | 57 | Renal clear cell carcinoma |



|         |   |    |                            |
|---------|---|----|----------------------------|
| PD3564a | F | 68 | Renal clear cell carcinoma |
| PD3565a | M | 65 | Renal clear cell carcinoma |
| PD3566a | M | 44 | Renal clear cell carcinoma |
| PD3567a | M | 75 | Renal clear cell carcinoma |
| PD3568a | F | 52 | Renal clear cell carcinoma |
| PD3569a | F |    | Renal clear cell carcinoma |
| PD3570a | M | 51 | Renal clear cell carcinoma |
| PD3571a | M | 72 | Renal clear cell carcinoma |
| PD3572a | F | 46 | Renal clear cell carcinoma |
| PD3573a | M | 65 | Renal clear cell carcinoma |
| PD3574a | M | 38 | Renal clear cell carcinoma |
| PD3575a | F | 62 | Renal clear cell carcinoma |
| PD3576a | M | 69 | Renal clear cell carcinoma |
| PD3577a | F | 53 | Renal clear cell carcinoma |
| PD3578a | M | 67 | Renal clear cell carcinoma |
| PD3579a | M | 74 | Renal clear cell carcinoma |
| PD3580a | M | 73 | Renal clear cell carcinoma |
| PD3581a | M | 66 | Renal clear cell carcinoma |
| PD3582a | M | 56 | Renal clear cell carcinoma |
| PD3583a | F | 77 | Renal clear cell carcinoma |
| PD3584a | M | 76 | Renal clear cell carcinoma |
| PD3585a | M | 67 | Renal clear cell carcinoma |
| PD3586a | F | 75 | Renal clear cell carcinoma |
| PD3587a | M |    | Renal clear cell carcinoma |
| PD3588a | F | 77 | Renal clear cell carcinoma |
| PD3589a | M | 91 | Renal clear cell carcinoma |
| PD3590a | M | 43 | Renal clear cell carcinoma |
| PD3591a | M | 79 | Renal clear cell carcinoma |
| PD3592a | F | 49 | Renal clear cell carcinoma |
| PD3593a | M | 49 | Renal clear cell carcinoma |
| PD3594a | M | 44 | Renal clear cell carcinoma |
| PD3595a | F | 56 | Renal clear cell carcinoma |
| PD3596a | M | 54 | Renal clear cell carcinoma |
| PD3597a | M | 60 | Renal clear cell carcinoma |
| PD3598a | M | 70 | Renal clear cell carcinoma |
| PD3599a | M | 67 | Renal clear cell carcinoma |
| PD3600a | F | 53 | Renal clear cell carcinoma |

|         |   |    |                            |
|---------|---|----|----------------------------|
| PD3601a | F | 56 | Renal clear cell carcinoma |
| PD3230a | F | 63 | Oesophageal SCC            |
| PD3231a | M | 75 | Oesophageal SCC            |
| PD3232a | M | 71 | Oesophageal SCC            |
| PD3233a | M | 58 | Oesophageal SCC            |
| PD3234a | M | 48 | Oesophageal SCC            |
| PD3235a | M | 58 | Oesophageal SCC            |
| PD3236a | M | 61 | Oesophageal SCC            |
| PD3237a | M | 55 | Oesophageal SCC            |
| PD3238a | M | 58 | Oesophageal SCC            |
| PD3239a | M | 62 | Oesophageal SCC            |
| PD3240a | M | 62 | Oesophageal SCC            |
| PD3241a | F | 70 | Oesophageal SCC            |
| PD3242a | F | 77 | Oesophageal SCC            |
| PD3243a | F | 54 | Oesophageal SCC            |
| PD3244a | M | 50 | Oesophageal SCC            |
| PD3245a | M | 57 | Oesophageal SCC            |
| PD3246a | M | 60 | Oesophageal SCC            |
| PD3247a | M | 68 | Oesophageal SCC            |
| PD3248a | M | 65 | Oesophageal SCC            |
| PD3249a | M | 71 | Oesophageal SCC            |
| PD3250a | M | 53 | Oesophageal SCC            |
| PD3251a | M | 52 | Oesophageal SCC            |
| PD3252a | M | 62 | Oesophageal SCC            |
| PD3253a | M | 56 | Oesophageal SCC            |
| PD3254a | M | 62 | Oesophageal SCC            |
| PD3255a | M | 45 | Oesophageal SCC            |
| PD3256a | M | 69 | Oesophageal SCC            |
| PD3257a | F | 82 | Oesophageal SCC            |
| PD3258a | M | 55 | Oesophageal SCC            |
| PD3259a | F | 66 | Oesophageal SCC            |
| PD3260a | M | 72 | Oesophageal SCC            |
| PD3261a | M | 72 | Oesophageal SCC            |
| PD3262a | M | 61 | Oesophageal SCC            |
| PD3263a | M | 41 | Oesophageal SCC            |
| PD3264a | F | 86 | Oesophageal SCC            |
| PD3265a | M | 61 | Oesophageal SCC            |

|         |   |    |                 |
|---------|---|----|-----------------|
| PD3266a | M | 62 | Oesophageal SCC |
| PD3267a | M | 50 | Oesophageal SCC |
| PD3268a | M | 86 | Oesophageal SCC |
| PD3269a | M | 84 | Oesophageal SCC |
| PD3270a | M | 67 | Oesophageal SCC |
| PD3271a | F | 77 | Oesophageal SCC |
| PD3272a | M | 52 | Oesophageal SCC |
| PD3273a | F | 86 | Oesophageal SCC |
| PD3274a | M | 78 | Oesophageal SCC |
| PD3275a | M | 52 | Oesophageal SCC |
| PD3276a | M | 48 | Oesophageal SCC |
| PD3277a | M | 53 | Oesophageal SCC |
| PD3278a | M | 57 | Oesophageal SCC |
| PD3279a | M | 75 | Oesophageal SCC |
| PD3280a | F | 22 | Oesophageal SCC |
| PD3281a | M | 61 | Oesophageal SCC |
| PD3282a | M | 55 | Oesophageal SCC |
| PD3283a | F | 76 | Oesophageal SCC |
| PD2944a | F | 46 | Glioblastoma    |
| PD2945a | F | 65 | Glioblastoma    |
| PD2946a | M | 67 | Glioblastoma    |
| PD2947a | M | 48 | Glioblastoma    |
| PD2948a | M | 56 | Glioblastoma    |
| PD2949a | F | 70 | Glioblastoma    |
| PD2950a | M | 41 | Glioblastoma    |
| PD2951a | M | 63 | Glioblastoma    |
| PD2952a | M | 68 | Glioblastoma    |
| PD2953a | F | 42 | Glioblastoma    |
| PD2954a | F | 62 | Glioblastoma    |
| PD2955a | M | 61 | Glioblastoma    |
| PD2956a | M | 43 | Glioblastoma 2° |
| PD2957a | M | 25 | Glioblastoma    |
| PD2958a | M | 55 | Glioblastoma    |
| PD2959a | F | 73 | Glioblastoma    |
| PD2960a | M | 62 | Glioblastoma    |
| PD2961a | M | 51 | Glioblastoma    |
| PD2962a | F | 58 | Glioblastoma    |

|         |   |    |                 |
|---------|---|----|-----------------|
| PD2963a | F | 54 | Glioblastoma    |
| PD2964a | M | 43 | Glioblastoma    |
| PD2965a | M | 39 | Glioblastoma    |
| PD2966a | F | 61 | Glioblastoma    |
| PD2967a | M | 56 | Glioblastoma    |
| PD2968a | F | 31 | Glioblastoma    |
| PD2969a | M | 48 | Glioblastoma    |
| PD2970a | M | 45 | Glioblastoma 2° |
| PD2971a | M | 37 | Glioblastoma    |
| PD2972a | M | 47 | Glioblastoma    |
| PD2973a | M | 66 | Glioblastoma    |
| PD2974a | F | 72 | Glioblastoma    |
| PD2975a | M | 71 | Glioblastoma    |
| PD2976a | F | 64 | Glioblastoma    |
| PD2977a | M | 40 | Glioblastoma    |
| PD2978a | M | 69 | Glioblastoma    |
| PD2979a | F | 50 | Glioblastoma 2° |
| PD2980a | F | 62 | Glioblastoma    |
| PD2981a | M | 70 | Glioblastoma    |
| PD2982a | M | 39 | Glioblastoma    |
| PD2983a | M | 45 | Glioblastoma    |
| PD2984a | M | 67 | Glioblastoma    |
| PD2985a | M | 50 | Glioblastoma    |
| PD2986a | F | 56 | Glioblastoma    |
| PD2987a | F | 54 | Glioblastoma    |
| PD2988a | M | 31 | Glioblastoma    |
| PD2989a | F | 61 | Glioblastoma    |
| PD2990a | F | 41 | Glioblastoma    |
| PD2991a | M | 66 | Glioblastoma    |
| PD2992a | F | 46 | Glioblastoma    |
| PD2993a | M | 46 | Glioblastoma    |
| PD2994a | M | 52 | Glioblastoma    |
| PD2995a | F | 45 | Glioblastoma 2° |
| PD2996a | M | 70 | Glioblastoma    |
| PD2997a | M | 71 | Glioblastoma    |
| PD2998a | F | 74 | Glioblastoma    |
| PD2999a | M | 58 | Glioblastoma    |

|         |   |    |                 |
|---------|---|----|-----------------|
| PD3000a | M | 55 | Glioblastoma    |
| PD3001a | F | 51 | Glioblastoma    |
| PD3002a | M | 48 | Glioblastoma    |
| PD3003a | M | 68 | Glioblastoma    |
| PD3004a | M | 74 | Glioblastoma    |
| PD3005a | M | 31 | Glioblastoma    |
| PD3006a | F | 42 | Glioblastoma    |
| PD3007a | M | 50 | Glioblastoma 2° |
| PD3008a | M | 51 | Glioblastoma    |
| PD3009a | M | 65 | Glioblastoma    |
| PD3010a | F | 37 | Glioblastoma    |
| PD3011a | F | 46 | Glioblastoma    |
| PD3012a | M | 72 | Glioblastoma    |
| PD3013a | M | 54 | Glioblastoma    |
| PD3014a | M | 22 | Glioblastoma    |
| PD3015a | M | 64 | Glioblastoma    |
| PD3016a | F | 68 | Glioblastoma    |
| PD3017a | F | 65 | Glioblastoma    |
| PD3018a | M | 65 | Glioblastoma    |
| PD3019a | M | 72 | Glioblastoma    |
| PD3020a | M | 64 | Glioblastoma    |
| PD3021a | F | 72 | Glioblastoma    |
| PD3022a | M | 65 | Glioblastoma    |
| PD3023a | M | 68 | Glioblastoma    |
| PD3024a | M | 52 | Glioblastoma    |
| PD3025a | M | 44 | Glioblastoma    |
| PD3026a | M | 35 | Glioblastoma    |
| PD3027a | M | 64 | Glioblastoma    |
| PD3028a | M | 81 | Glioblastoma    |
| PD3029a | M | 48 | Glioblastoma    |
| PD3030a | F | 42 | Glioblastoma    |
| PD3031a | M | 67 | Glioblastoma    |
| PD3032a | F | 53 | Glioblastoma    |
| PD3033a | M | 54 | Glioblastoma    |
| PD3034a | M | 66 | Glioblastoma    |
| PD3035a | M | 66 | Glioblastoma    |
| PD3036a | F | 61 | Glioblastoma    |

|         |   |    |                  |
|---------|---|----|------------------|
| PD3037a | M | 49 | Glioblastoma     |
| PD3038a | M | 59 | Glioblastoma     |
| PD3039a | F | 53 | Glioblastoma     |
| PD2894a | f | 65 | Multiple myeloma |
| PD2895a | m | 70 | Multiple myeloma |
| PD2896a | M | 65 | Multiple myeloma |
| PD2897a | M | 65 | Multiple myeloma |
| PD2898a | M | 68 | Multiple myeloma |
| PD2899a | M | 70 | Multiple myeloma |
| PD2900a | m | 61 | Multiple myeloma |
| PD2901a | F | 55 | Multiple myeloma |
| PD2902a | M | 68 | Multiple myeloma |
| PD2903a | F | 43 | Multiple myeloma |
| PD2904a | F | 62 | Multiple myeloma |
| PD2905a | m | 68 | Multiple myeloma |
| PD2906a |   | ND | Multiple myeloma |
| PD2907a | f | 62 | Multiple myeloma |
| PD2908a | F | 64 | Multiple myeloma |
| PD2909a | F | 53 | Multiple myeloma |
| PD2910a | M | 62 | Multiple myeloma |
| PD2911a | f | 59 | Multiple myeloma |
| PD2912a | F | 58 | Multiple myeloma |
| PD2913a |   | ND | Multiple myeloma |
| PD2914a | F | 60 | Multiple myeloma |
| PD2915a | f | 54 | Multiple myeloma |
| PD2916a | F | 55 | Multiple myeloma |
| PD2917a | M | 60 | Multiple myeloma |
| PD2918a | f | 56 | Multiple myeloma |
| PD2919a | m | 57 | Multiple myeloma |
| PD2920a | M | 54 | Multiple myeloma |
| PD2921a | M | 49 | Multiple myeloma |
| PD2922a | M | 66 | Multiple myeloma |
| PD2923a | F | 59 | Multiple myeloma |
| PD2924a | M | 67 | Multiple myeloma |
| PD2925a | F | 53 | Multiple myeloma |
| PD2926a | F | 54 | Multiple myeloma |
| PD2927a | M | 56 | Multiple myeloma |

|         |    |    |                  |
|---------|----|----|------------------|
| PD2928a | M  | 54 | Multiple myeloma |
| PD2929a | f  | 78 | Multiple myeloma |
| PD2930a | M  | 66 | Multiple myeloma |
| PD2931a | M  | 57 | Multiple myeloma |
| PD2932a | M  | 79 | Multiple myeloma |
| PD2933a | M  | 79 | Multiple myeloma |
| PD2934a | M  | 78 | Multiple myeloma |
| PD2935a | m  | 58 | Multiple myeloma |
| PD2936a | M  | 57 | Multiple myeloma |
| PD2937a | M  | 57 | Multiple myeloma |
| PD2938a | M  | 89 | Multiple myeloma |
| PD2939a | M  | 47 | Multiple myeloma |
| PD2940a | M  | 71 | Multiple myeloma |
| PD2941a | M  | 60 | Multiple myeloma |
| PD2942a | ND | ND | Multiple myeloma |

### Supplementary Table 3 - PCR Primer Sequences

#### UTX sequencing primers

| Exon | STS          | Primer 1                    | Primer 2                    |
|------|--------------|-----------------------------|-----------------------------|
| 1    | stCE0X-24550 | CGATAAAGTTGGTGTGCTGG        | ATCTCACGAACCCAAAGAGG        |
| 2    | stCE0X-27173 | CTCGGTTTGGCGCTCTTC          | CCCTTGACCCTAAACAGGCA        |
| 3    | stCE0X-24598 | AATATTGACTTCTTAGGTGATCGAA   | TCTATATCAAACCTGGGTCACCTTCT  |
| 4    | stCE0X-27565 | TATCTACTGGGAGGTGGGTGTG      | CAGCCTTCTTTTACTCCCAGG       |
| 5    | stCE0X-24518 | GTTGATTGGAATCTGTGCCA        | CCAAAAAGCTTTCTAATCTAAGCC    |
| 6    | stCE0X-25353 | CATATGCCCTTTTCAATTTT        | TGTTACCATGGAAGCTTAGCA       |
| 7    | stCE0X-26796 | GGCTAGTGTATTTTATTTGCATAGCAT | CCAGCAAAACCTGTTTTAATCC      |
| 8    | stCE0X-28655 | GACAGAAATTTTCATTTGATAATGACC | GGAATTAATTTGTACACAGCAAGC    |
| 9    | stCE0X-28737 | CAACTGTCTGATGTTAAAGAAACATTC | GGGTAAATACTAGGGAGTAATTTTGA  |
| 10   | stCE0X-26889 | ATGGCCAGAATTGGCAGT          | GTCCTGCTAGACCAGATTATGCT     |
| 11   | stCE0X-25351 | CAGCATGCTTTTTAGCACCT        | GGCTGATTTTGCTGCTGATA        |
| 12   | stCE0X-29332 | CAGATACATGGTGTTCAATAGGG     | GGAAACAGATTATAGACATCAAAACA  |
| 13   | stCE0X-27072 | GGTTTATATTCCGGTTACCCCTGT    | AGGTTCTAAGTTGGTACCCCAAA     |
| 14   | stCE0X-26800 | AATGTTGGATCTAGTGGACAGTG     | TTAATACTTGTGCTACCTCTACTCC   |
| 15   | stCE0X-25856 | TGACCAGATAGTGGTTCTGAGTTT    | AGCCCTAAAAACCTTGCCTC        |
| 16   | stCE0X-26152 | CACACATTCCCTAATTATACATCTTCA | AGTTGGTTTTTCCACGGCT         |
| 16   | stCE0X-29380 | GGCCAATGGACCCTTTTC          | CCACTGTAAATTAATGGTGCATTTT   |
| 17   | stCE0X-28464 | AGGACTTGGGTCAAATTATCTTATACA | CCATGGCTAGGACTGCAAA         |
| 17   | stCE0X-28465 | TACCTCAGGTGGACAACAAGG       | GCAGATCTGTTTTCATGGGG        |
| 17   | stCE0X-28466 | AACTCTGTTGCCTCTTCACCA       | GGGCAGTAACAGCACAAATCA       |
| 18   | stCE0X-24318 | TGGACTTGTGCAAATGCCT         | GCTGCTCAAAATTAGGGCAAT       |
| 19   | stCE0X-27360 | TCACCCATAAAAATGCGTTA        | CACAATTATGTAACGGACCAAA      |
| 20   | stCE0X-27556 | ATAGCTCAGGTTGTGCAGAGG       | GAGACAACCTGGAGAACACTTACAAA  |
| 21   | stCE0X-62384 | TTTTTCAGTTGTATGGTGGAAAG     | AATGACAATAAATGAAACAGAAGAGG  |
| 22   | stCE0X-28548 | CCAGTTGTAGAACACTAACTAGACTG  | ATGACAATAAATGAAACAGAAGAGG   |
| 23   | stCE0X-23981 | TTTTGTTGGGAAGTTTCTTTGG      | ATGAAAAGGGGAAAAATCTTAATCTG  |
| 24   | stCE0X-25571 | TGAGCATTGTGAAGGTTTTGTTT     | CTTTTCTATCTTCTTAATTCATGGGT  |
| 25   | stCE0X-28774 | ATATACATACAGCAGATCTTTTGCAC  | TACTACGAATTACAATTCTATGCAAGG |
| 26   | stCE0X-28828 | GTTTTGAGTTTTTTCAGAATTGATG   | TGGGAAAGAAGCACAGGTCT        |
| 27   | stCE0X-27486 | TCAGGCCTGCTGAGCATT          | AATGGCTAAGCAACAAAATTGAA     |
| 28   | stCE0X-27503 | AACCAGAGATCACTGTCCACAA      | CTCACCCAGGAAAACCTGAAAA      |
| 29   | stCE0X-27586 | AGCAGGCTGTTGAACTTTTTG       | AAGGGGGAAAAGACAGATGAA       |

#### UTX multiplex assays

| Exon | STS     | Primer 1             | Primer 2              | Product size | Control primer |
|------|---------|----------------------|-----------------------|--------------|----------------|
| 1    | UTXhrd2 | GTTGTGAATTCGCTGCGTTT | TGCCTTACCTTGCCCAGTAG  | 466          | ACTIN 3        |
| 2    | UTXhrd6 | CGGACTGGACAGGTACGG   | GAAAAGAGCGATTTTCGCAAG | 481          | ACTIN 3        |



|              |             |                        |                        |     |         |
|--------------|-------------|------------------------|------------------------|-----|---------|
| 3            | UTXhrd10    | ACATAGGGAAGCTGTTCCCTTC | CACTGAACATGCAGGTGGTT   | 489 | ACTIN 8 |
| 4            | UTXhrd14    | TCCTCCACGAGTTTTGATCTTT | AACCCTTTTCCAATACCTTTCC | 454 | ACTIN 3 |
| UTX intron 2 | rs7056671_2 | AAACATGTGGACTCTGGAGTTG | AATATGACGGGGGTGGGA     | 244 | ACTIN 4 |
| Control      | ACTIN 3     | CCTGCAGAGTTCCAAAGGAG   | GGCATCCTCACCCTGAAGTA   | 320 |         |
| Control      | ACTIN 4     | GGACATGCAGAAAAGTGCAAA  | AAGATGACCCAGGTGAGTGG   | 389 |         |
| Control      | ACTIN 8     | GTCAGGCAGCTCGTAGCTCT   | AACACTGGCTCGTGTGACAA   | 579 |         |

#### UTX exon deletion mapping primers

| Exon | STS name | Primer 1                | Primer 2                   | Product size |
|------|----------|-------------------------|----------------------------|--------------|
| 5    | UTXhrd17 | ATTTTCAGGGCTGGAATACCTC  | AAATCTAAGGTGAGCCAACACC     | 450          |
| 5    | UTXhrd18 | CAAGAAACAAAAAGAACCAGAGG | CAAGCACAAAACAAAACAAGCA     | 475          |
| 6    | UTXhrd21 | CAAGAATTCATGCACGTGTTA   | ACCTTCACCCTTTCTCTGATG      | 450          |
| 6    | UTXhrd22 | CAACCTATCTTCCTTCCCCTTT  | AATTCCAACATTTCTCAATGCTC    | 451          |
| 7    | UTXhrd25 | CCCACAGCATGTCAGTTGTC    | CTGGTCTTGCAGGTTCCATT       | 404          |
| 7    | UTXhrd26 | TCTCCATTCTCAGCTGTCTCAA  | TAGCCATGGCAACCAATACA       | 408          |
| 8    | UTXhrd29 | TGCTTAATGTTGCCATTTTGA   | AAGTAACGCCCAGAACTCCA       | 477          |
| 8    | UTXhrd31 | TGTGGTTTCTTATCATGATTGTG | ACAGCAAGCACTCCTTGAA        | 443          |
| 9    | UTXhrd33 | TTCAGATGATATTGGCATTGG   | CCACATATTTGCCCACTCG        | 450          |
| 9    | UTXhrd34 | TGGTGTAGGTACTCTGGAACAA  | ACTGTGGGAAGGACAATGCT       | 463          |
| 10   | UTXhrd37 | AATGGCCAGAATTGGCAGT     | TCCTGCTAGACCAGATTATGCT     | 500          |
| 10   | UTXhrd38 | TGAATGAAAGCCCTTTGTAGC   | TTGTTTAACTTTTCCAGGAATCTTGG | 500          |
| 11   | UTXhrd50 | GGTTTGTGGAGGGCAAAT      | GGCTGATTTTCTGCTGATA        | 460          |
| 11   | UTXhrd51 | TGCAGCATGCTTTTTAGCAC    | TCAACTCAGAAGAAGTCTTGG      | 446          |
| 12   | UTXhrd52 | ATTGGGAAAGTTCAGGATGC    | CTGGGGAAATATGTGGCTTT       | 494          |
| 12   | UTXhrd53 | GCAAGTGCAGATACATGGTGT   | CCTCCTTCTGCCTGAGTGT        | 457          |
| 13   | UTXhrd55 | CAGTCTTCACTCTTGCTTGG    | GGGCACCTGCAGAACATAAC       | 423          |
| 13   | UTXhrd57 | GGCTTGTGTTAAATTTGCTTTTT | TCATGAAAATGCACAAAGGTTT     | 387          |
| 15   | UTXhrd61 | TCATTTTCAGGGAAAGGTTGC   | TGCTAACAAATTTTCCAGGGAAAA   | 224          |
| 15   | UTXhrd62 | TGGAGTGTGTGACTGTTGGTC   | TCTAAAAATCTCCGTCAATTACCA   | 418          |
| 16   | UTXhrd64 | ATGGAAACGTGCCTTACCTG    | ATGGTGCATTTTGGGTGATT       | 377          |
| 16   | UTXhrd66 | CAGGAGTTGCACAGTACGA     | CCAGCGTTCTTGATGTGCTA       | 219          |
| 17   | UTXhrd70 | TGTTGATCCATGGTCATAGCTT  | GCCCAGTGAAGAGAGAGGT        | 426          |
| 17   | UTXhrd71 | TGGAGTCATTTAGATAGCAAGGA | GTGGGATGTCCGTTCTGATT       | 346          |
| 28   | UTXhrd41 | TGCCAGTGGTGTGATGAGT     | GAGCAAACACTGCTGCTTCA       | 491          |
| 28   | UTXhrd42 | TCACTGTCCACAATTTTCACTCA | CTGGTCTCACCCAGGAAAAAC      | 496          |

|    |          |                       |                      |     |
|----|----------|-----------------------|----------------------|-----|
| 29 | UTXhrd45 | TCCCCTAACTTCACAAGCAGA | TTCTGAAGGGGGAAAAGACA | 475 |
| 29 | UTXhrd46 | TGTTGCATAGCAGGCTGTTG  | CAAATTCATCAGCCCAGAAA | 485 |

**UTX deletion mapping primers**

| STS location | STS          | Primer 1                    | Primer 2                    | Product size |
|--------------|--------------|-----------------------------|-----------------------------|--------------|
| 5' upstream  | rs7058967_1  | CAGTTTAAAAGTGCAAAATGAGTTAGA | TATGTCACTGGCCTATGTGTTG      | 200          |
| 5' upstream  | rs7058967_2  | AAAGAATCATGTCACCTGAAAAA     | CCTTAGGCAAATTCCTTAAACG      | 211          |
| 5' upstream  | rs5952642_1  | GACACCCATGACATCCATGA        | AAAGGTCACTTCCCCACCTC        | 200          |
| 5' upstream  | rs5952642_2  | GCGTTGCATTTATCTGTGGA        | GAGCCCAAGTACCAAAAAGATTG     | 200          |
| 5' upstream  | X_44599000_1 | TTGGTTTGAAGAAGTCTATTAGGGAA  | AGAGTGCATAAAGCCTTTTCGAG     | 200          |
| 5' upstream  | X_44599000_2 | TTTCTCTCTATGAATTGGCTGC      | TGACTAAATAAAAAATAATCTGCCTGG | 200          |
| 5' upstream  | X_44605000_1 | CGGTTCTCCAGATTCTCCAT        | TCCCCAACAGTAGGAACAAAA       | 200          |
| 5' upstream  | X_44605000_2 | CCATTCAATTTCTTAGCATCAGC     | AAGGAAGAGGTGGGGACTGA        | 200          |
| 5' upstream  | X_44606000_1 | TGGTGAGCAGCTTTGAAGG         | CTGGATTGAGAAAACCCAG         | 200          |
| 5' upstream  | X_44606000_2 | GCACCAAGTCTTTGAGATGG        | TGGATCTGGGTGAAATAGGTG       | 200          |
| 5' upstream  | X_44609000_1 | CCCAGCCCTCATTTTCATT         | GGCAAAGCATTTATTATGCCA       | 200          |
| 5' upstream  | X_44609000_2 | TTCTGCTGTGATGAAATATTCTG     | GCATGCCTTTAACGATTATTTTG     | 200          |
| 5' upstream  | X_44610000_1 | GCCAGCCAGTTAGCCAGTAT        | AGGCAGCACCATGAAGAGTC        | 200          |
| 5' upstream  | X_44610000_2 | AGCCCAGGTGAAAGCAAAT         | GGCCAAGAGGATAAGGGAAA        | 200          |
| 5' upstream  | CN_951003_1  | CTGACCTCGGGTGATCCTT         | TCTCAGAACACTGCCCAAAA        | 211          |
| 5' upstream  | CN_951003_2  | CTCCGCCTCCCAGATTTAAG        | CATCATAGCAAGACCCAGGA        | 311          |
| 5' upstream  | X_44613290_1 | AGCAGTCCTAACTCTATTCTCACAA   | ACGATCAAACATAGGTTCAAAA      | 200          |
| 5' upstream  | X_44613290_2 | GCTCAAACCTAACCATATATCTATTTT | TGTTAGTGCCATATAACCTTTACAGA  | 216          |
| Intron 2-3   | X_44633000_1 | GATGTTTAAAATTCTAGGCATAATCAC | GCCAAGCGACTCTTGCTACT        | 200          |
| Intron 2-3   | X_44633000_2 | CCACTTCTTTCTTACAGTTGGGA     | ATCTTTGTAATATCTACATGCCAG    | 200          |
| Intron 2-3   | X_44634000_1 | AAATAGTCATGATTCTATGAAAAGAGG | AGTCAATACATAAGTGTTGCCATTT   | 192          |
| Intron 2-3   | X_44634000_2 | TGTCTTGTTGGACTTGGTTGTC      | GGGAAACTGGGTAAAGCACA        | 200          |
| Intron 2-3   | X_44640000_1 | TTAAGTTTCTAAGTATTTGGAGGGTTT | TGCAATATCCAGAGCAACCA        | 200          |
| Intron 2-3   | X_44640000_2 | ACATTTCAGCACTACTTTAGCTGTGT  | AAAAAGCAGATGAATGAGAAACA     | 200          |
| Intron 2-3   | X_44643000_1 | TAGGCTTGCCACTAACCCAA        | AAGAAGCAGGTGGTGCTTTG        | 200          |
| Intron 2-3   | X_44643000_2 | TGTGTGGGGGATGGAAGAT         | ACCACCACCACCAAGCAG          | 178          |
| Intron 2-3   | X_44644000_1 | AGGGAGGACCTGGGAAGAAT        | ATGGGTACGCCCCTAATAGA        | 200          |
| Intron 2-3   | X_44644000_2 | TATGGTACTCCATTTTGGTGGGA     | AAACCATATCCCCGAAATAACA      | 200          |
| Intron 2-3   | X_44646000_1 | AATATTCTGTGTCCCTAGTAACAATTT | ATTCAAGGACAAAAATAGGTTGAA    | 200          |
| Intron 2-3   | X_44646000_2 | TTGAGTTGTTTGTTTTACCTGTT     | GCAACAATAACCAAAATAGAGC      | 208          |
| Intron 2-3   | X_44648000_1 | AGAATATTTGAGGCTGTGCGAGC     | AAACATGACCTCAAGTAAACAAAA    | 200          |
| Intron 2-3   | X_44648000_2 | ATCCCAGTTACCTCTCTTCAAGT     | TGTCTCAAGAACTAAAGTATAAGGTCA | 200          |
| Intron 2-3   | X_44649000_1 | TGTACTCCCTCTGCTGGCTT        | GAATCAAAGGCTTGCAAGGAA       | 200          |
| Intron 2-3   | X_44649000_2 | CAAGAGGGATCTCCAGGG          | TGTGGCTTTTTAATTTGCC         | 200          |
| Intron 2-3   | X_44650000_1 | CTGGTTACGTTATCAGCTGGC       | GTTTTTAAATGGTTGAGGAGGG      | 200          |

|            |              |                             |                            |     |
|------------|--------------|-----------------------------|----------------------------|-----|
| Intron 2-3 | X_44650000_2 | TGGTTAAATTGCTGTTTTAAAGTTC   | AGATTTGGTTCTGGAACAATGTA    | 213 |
| Intron 2-3 | X_44651000_1 | TCAGGCTGGTCTTCAACTCC        | GAAAGCGCTAAAGAATGGGA       | 200 |
| Intron 2-3 | X_44651000_2 | TGTTGGGATTATCGGCGT          | AATGAAGAAATGTCAGCACTGG     | 200 |
| Intron 2-3 | X_44652000_1 | AAATTACCTGTATCCTTCAAAGGTG   | AAATTA AACAGACACACTGAGCA   | 200 |
| Intron 2-3 | X_44652000_2 | AGGTGTGAGCCACTGCTTCT        | CCACTTCCACAGTTTGGCTA       | 200 |
| Intron 2-3 | CN_951015_2  | GGATTCTGCTGCTTAAAAGG        | CACATGTGATGAAGCCATCC       | 314 |
| Intron 2-3 | CN_951015_3  | TGGACCTGCTTTGTCTGTTG        | GACCAACAGGTTAGGGCAAA       | 447 |
| Intron 2-3 | X_44653000_1 | CTCTTGATGTGGAAGAGGCA        | CACGCAAAGGACTTCTGGTT       | 200 |
| Intron 2-3 | X_44653000_2 | CCTGTTGGTCAAAGCCTACC        | TGTTCCCTTCCAACATCTCTG      | 200 |
| Intron 2-3 | X_44654000_1 | TCAGATGCTAGTCTAATAAAGATGGC  | GAATTGATCCTAACAGCCACA      | 200 |
| Intron 2-3 | X_44654000_2 | AAGTCAAAATGTATCTCACAGTCCA   | ATTCTTTTACACAGTCACCTAATTTT | 200 |
| Intron 2-3 | CN_951016_2  | GAGACGAAGTCTCGCTCCTG        | AATCGGGCAGATCATTGAG        | 236 |
| Intron 2-3 | CN_951016_3  | AGCATAGCACTTTGTGGCTGT       | CATGACAAAACCTCCGCCTCT      | 499 |
| Intron 2-3 | X_44655000_1 | TCTTGCACCGACCTTAATCC        | TGGGGAAAGGATGGAAAAAT       | 200 |
| Intron 2-3 | X_44655000_2 | CTCAAATGATCTGCCCGATT        | CCTTGGGATGCTGTTGATCT       | 426 |
| Intron 2-3 | CN_951018_1  | ACAAGTCCCAGCCATAGTG         | CTTTTGACTCCCCAAAACA        | 392 |
| Intron 2-3 | CN_951018_2  | TCCCTGGACAACCTCCTTTT        | TCTCTCAGAAAGGCGAGCTT       | 253 |
| Intron 2-3 | CN_951019_2  | TGATGGGGATGATATTTTGTCA      | CCATACTGATGCCAAGCAAA       | 220 |
| Intron 2-3 | CN_951019_3  | ACCAAGGGAAAGGTAATGGT        | CAAGCAATGCTAACACCCATA      | 437 |
| Intron 2-3 | CN_951020_2  | TGGGTGTTAGCATTGCTTGT        | TGGCAAAGATCATGAATCACA      | 466 |
| Intron 2-3 | CN_951020_3  | CATGTGGACTCCAGTTTAAAAG      | TCAATCCTCCCTCCCTTTT        | 415 |
| Intron 2-3 | rs12014045_1 | TTCTCCTTTGCATTGTTTTGA       | AAGGAGCTCAACGGATCTCA       | 200 |
| Intron 2-3 | rs12014045_2 | TGTCTGCAAAAAGTTAATTTTCTTCTT | AAGCAGTCAAAGGCAGGAGA       | 200 |
| Intron 2-3 | CN_951028_2  | GGGAATGGGGCTTCACTATT        | TGGAGGGTTGCCATTCTAAA       | 463 |
| Intron 2-3 | CN_951028_3  | TGGTAATGTGCCTTGGTCTG        | TCATACCACCACCCTAACA        | 290 |
| Intron 2-3 | CN_951030_2  | AGGTGGGTGGTGACAACAAT        | TTTCCTGCGCAATATCCTTC       | 450 |
| Intron 2-3 | CN_951030_3  | TTCAAAACCTAGCCCCTCAG        | AGCTCTGCAACCACCTTTGT       | 334 |
| Intron 2-3 | CN_951034_1  | CTGGCTTCACTCACTCAGCA        | TGAGGATGCAGAACAAGTGG       | 380 |
| Intron 2-3 | CN_951034_3  | AATGAGGGATGCCTGTTTGT        | TTGCTGGTGAGAATGCAAAA       | 433 |
| Intron 2-3 | X_44691000_1 | CCGTTAGAAATAACTGCAGGC       | TCAAAAGAAAGTTGGCATTGTG     | 200 |
| Intron 2-3 | X_44691000_2 | TGTTAGGTTATTGTTGCCAGTT      | ATGCAATTTAGACACACGTAATA    | 234 |
| Intron 2-3 | X_44693000_1 | GAGAACTGTGCACAATGTATGGA     | AGAGTATCTGTTAACCAAGTTTTGC  | 200 |
| Intron 2-3 | X_44693000_2 | AGCACCTGACATCATTTAGGAAA     | CAGTCAAATTAAGCACAATTTAAGC  | 200 |
| Intron 2-3 | X_44700000_1 | TGCGTTGTCTTGAGTAGTCTTTT     | TGGGAGTTACAAAGGAGATACC     | 201 |
| Intron 2-3 | X_44700000_2 | CCATTAGGTTAATATAGGGGTTTTTC  | AAAATATCCTTGACTCTATGATTCT  | 200 |
| Intron 2-3 | CN_951039_1  | TACCATTTGTAGTCACCCAGC       | TTTGAGCTTGTGAACACAGACA     | 200 |
| Intron 2-3 | CN_951039_2  | GACAGCGTCTGTTTTAGCA         | TGGTATCTGCTGCACTGTTATT     | 201 |
| Intron 2-3 | CN_951040_1  | GGAATATGGCACTATGATGAAA      | CAGCAAGGAGGATAAAAGCAA      | 200 |

|            |              |                             |                              |     |
|------------|--------------|-----------------------------|------------------------------|-----|
| Intron 2-3 | CN_951040_2  | TTTCTACGTAGCTGGGAGGA        | TTTCTTATGTTTATAAATGAAAAGCCT  | 200 |
| Intron 2-3 | X_44703000_1 | TTCCAGTCCTTCTTCTCTGC        | TTTACTCAAAAAGGCTAATGATAACAGA | 200 |
| Intron 2-3 | X_44703000_2 | AGCAAGAAATAAAAATAATCCTATTGA | AACTTGAGATAATTTCCAATATTCCTA  | 189 |
| Intron 2-3 | X_44704000_1 | TCCCAATAATGTTATGAATTTCTCTG  | ATCTTTCTGCTTCCCTATAATTAATAA  | 200 |
| Intron 2-3 | X_44704000_2 | TTTTATACTCTAGCCATCTGCCA     | CTTCAATTCCTGTTCTACTCTTAGC    | 202 |
| Intron 2-3 | rs17244990_1 | TCACATAATTCAATAAAGTTCTTCTCA | GGCATAAGTGCTTTTCCCAT         | 199 |
| Intron 2-3 | rs17244990_2 | TGTGGGAAAGATGCATATTATTT     | CCCTATGTATTTATTAATAAAGAGCCAC | 203 |

### UTX cDNA primers

| Exons           | STS         | Primer 1                   | Primer 2                | Amplimer size |
|-----------------|-------------|----------------------------|-------------------------|---------------|
| Exon 10-Exon 12 | UTX_cDNA_3  | TGGGAGATAAAGCCACCAAG       | GTGCTGCAAGTGCAGAGGTA    | 402           |
| Exon 2-Exon 5   | UTX_cDNA_20 | CCTCTTTGGGTTCGTGAGAT       | CAAGACCATATAAAAAGGCAGCA | 245           |
| Exon 1-Exon 6   | UTX_cDNA_21 | CCTGACAGCCGAGGAGAG         | GCTGGGATCAACATAAAGCA    | 367           |
| Exon 25-Exon 27 | UTX_cDNA_11 | GCTTGGAATGTTGGTCCACT       | GCAATGAGAGCTTCCCTCAA    | 224           |
| Exon 25-Exon 26 | UTX_cDNA_12 | ATTGGCTGGTGCACAACAT        | GCTTTGGATCTGAGACCTTGA   | 172           |
| Exon 24-Exon 26 | UTX_cDNA_13 | TGGGGTGTCTGAATGACTTC       | TCCATTCGTACCGTTCCACT    | 256           |
| Exon 23-Exon 24 | UTX_cDNA_30 | CGTGTTCGTATCAGCAGGAAA      | CACCCAGTAACCTTCAGGA     | 196           |
| Exon 23-Exon 25 | UTX_cDNA_31 | CATATTGGGCATGAACACAGTT     | CCACCAAGAACCCATTAGGA    | 208           |
| Exon 16-Exon 17 | UTX_cDNA_33 | GACACTATTTTGATAGGCAATAATCA | CTAGGCAGGGTGGGATGTC     | 296           |
| Exon 16-Exon 17 | UTX_cDNA_34 | CTTTTCTGCAGGCCATGTTC       | CAGCCCCCTGTGTTACTGAA    | 371           |

### UTY multiplex

| Exon     | STS         | Primer 1              | Primer 2               | Product size | Control primer |
|----------|-------------|-----------------------|------------------------|--------------|----------------|
| Exon 6   | UTY_exon6_2 | CGGAATTGAGAACAAAAGGA  | TTCCAACGCTTCTCAGTGAC   | 407          | ACTIN 3        |
| Exon 22  | UTY_exon22  | TGAATCACAGGGTTTTTGAGG | TGATGGAAAAACAATACCCTGA | 402          | ACTIN 3        |
| Controls | ACTIN 3     | CCTGCAGAGTTCCAAAGGAG  | GGCATCCTCACCTGAAGTA    | 320          |                |

Supplementary Table 4 - UTX Non-truncating variants identified

| Tumour      | Cancer Type | Sex | cDNA Annotation                | Protein Annotation |
|-------------|-------------|-----|--------------------------------|--------------------|
| OPM-2       | MM          | F   | Het c.197G>A                   | p.G66D             |
| ESS-1       | Endo        | F   | Het c.319G>A                   | p.E107K            |
| CoCM-1      | Colo        | M   | Het c.855G>T                   | p.Q285H            |
| HT-1376     | Bladder     | F   | Het Exon 11 -3 C>G             |                    |
| LB1047-RCC* | RCC         | F   | Het c.1124A>G                  | p.Y375C            |
| 647-V       | Bladder     | M   | Het c.1166C>T                  | p.A389V            |
| NCI-H1793   | NSCLC       | F   | Hom c.1440C>T                  | p.L480L            |
| HT-3        | Cx          | F   | Het c.1592C>T                  | p.S531L            |
| PD2990a     | Glioma      | F   | Het c.1666C>A                  | p.P556T            |
| HEC-1*      | Endo        | F   | Het c.1780G>T                  | p.G594C            |
| C-33-A*     | Cx          | F   | Het c.1818C>T                  | p.N606N            |
| LoVo*       | Colo        | M   | Het c.1887G>T                  | p.E629D            |
| SNU-C1      | Colo        | M   | Hom c.2031G>A                  | p.Q677Q            |
| SN12C       | RCC         | M   | Hom c.2202T>G                  | p.T734T            |
| SK-UT-1*    | Leio        | F   | Het c.2233G>A                  | p.E745K            |
| CP66-MEL    | Mel         | M   | Hom c.2251G>A                  | p.V751I            |
| CoCM-1      | Colo        | M   | Het c.2264C>T                  | p.T755M            |
| CAL-120     | Breast      | F   | Hom c.2443G>T                  | p.V815F            |
| NB16        | Nb          | M   | Het c.2481A>T                  | p.T827T            |
| CoCM-1      | Colo        | M   | Het c.2822C>G                  | p.P941R            |
| COLO-668    | SCLC        | F   | Het c.2846G>T                  | p.R949L            |
| LS-174T*    | Colo        | F   | Hom c.2894A>C                  | p.N965T            |
| GP5d*       | Colo        | F   | Het c.2987A>G                  | p.H996R            |
| NCI-H1651   | NSCLC       | M   | Het c.3085C>T                  | p.H1029Y           |
| CAL-27      | HNSCC       | M   | Hom c.3304G>A                  | p.E1102K           |
| HT*         | B-lymph     | M   | Hom c.3331C>T                  | p.R1111C           |
| CW-2*       | Colo        | F   | Het c.3337G>A                  | p.V1113I           |
| PD2905a     | MM          | M   | Hom c.3487G>A                  | p.D1163N           |
| HEC-1*      | Endo        | F   | Het Exon 25 +1 G>A             |                    |
| HCC2998     | Colo        | M   | Het c.3614T>G                  | p.V1205G           |
| PF-382      | T-ALL       | F   | Het c.3786A>G                  | p.Q1262Q           |
| CTV-1*      | AML         | F   | Hom c.3822C>T                  | p.S1274S           |
| SKG-IIIa    | Cx          | F   | Het c.3897T>C                  | p.T1299T           |
| PD2173a     | RCC         | F   | Het c.3930C>A                  | p.L1310L           |
| PD2173a     | RCC         | F   | Het c.3938C>T                  | p.A1313V           |
| NCI-H1436   | NSCLC       | M   | Hom c.3961G>T                  | p.G1321W           |
| EFE-184     | Endo        | F   | Hom c.4073G>A                  | p.C1358Y           |
| LC4-1       | ALL         | F   | Het c.4072T>C                  | p.C1358R           |
| J82         | BI          | M   | Hom c.4082G>A                  | p.C1361Y           |
| SW684       | Fibro       | M   | Het c.4160A>G                  | p.Y1387C           |
| PD3485a     | RCC         | M   | Het Exon 21 +3<br>del(AAGTCAT) |                    |

Supplementary Table 5 - UTX reintroduction: significant expression changes

**KYSE450**

| ProbeName  | ID                 | GeneSymbol | logFC  | t     | P.Value  | adj.P.Val | B    |
|------------|--------------------|------------|--------|-------|----------|-----------|------|
| ILMN_15305 | 6SBHqKt6R_OqvL5_kk | ST6GALNAC2 | 0.45   | 8.92  | 4.11E-09 | 9.27E-05  | 10.4 |
| ILMN_25529 | rjEHulOHigKJ0ZUiHo | IGFBP3     | 0.375  | 7.87  | 4.02E-08 | 0.00023   | 8.46 |
| ILMN_9856  | 0XdV3VP_R7u2OQ32ck | MPPED2     | 0.502  | 7.77  | 5.03E-08 | 0.00023   | 8.26 |
| ILMN_20293 | 6c9N6Ciop_jiSqOlnk | CALML3     | 0.579  | 7.7   | 5.92E-08 | 0.00023   | 8.12 |
| ILMN_16551 | xqhUlpLvnt5O1F_g3o | PKP1       | 0.382  | 7.61  | 7.17E-08 | 0.00023   | 7.95 |
| ILMN_14703 | BUo433ueoSod5d_i.o | KRT4       | 0.455  | 7.6   | 7.31E-08 | 0.00023   | 7.93 |
| ILMN_17040 | 9SW3pSeXYM3hJ8kAKk | LOC92196   | 0.766  | 7.58  | 7.65E-08 | 0.00023   | 7.89 |
| ILMN_7654  | TFE9.r1SiJVPVJV63U | KRT5       | 0.436  | 7.55  | 8.17E-08 | 0.00023   | 7.83 |
| ILMN_1735  | upJRRddreVXTwD0b1Q | C10orf116  | 0.433  | 7.49  | 9.42E-08 | 0.000236  | 7.71 |
| ILMN_21370 | QeeYeOUoQX91SOWeIl | MT1F       | 0.366  | 7.39  | 1.20E-07 | 0.000271  | 7.49 |
| ILMN_13394 | cSTR6K60RlrJO5XLxl | SLC6A15    | -0.231 | -7.24 | 1.69E-07 | 0.000347  | 7.19 |
| ILMN_25291 | ToJ6ycuXdzQNKv5F_I | NPL        | 0.307  | 7.09  | 2.38E-07 | 0.000447  | 6.88 |
| ILMN_25111 | KoXa301C6Xiz9HpK_4 | ALDH1A3    | -0.441 | -7.03 | 2.76E-07 | 0.000479  | 6.75 |
| ILMN_17381 | 9V0C7RDnXXjh11UgBQ | OLR1       | -0.266 | -6.89 | 3.79E-07 | 0.000611  | 6.47 |
| ILMN_28724 | KURKrov3hgrXCou.u0 | EDN1       | 0.369  | 6.8   | 4.75E-07 | 0.000714  | 6.26 |
| ILMN_1007  | KIS.3eurUu.71yu3nk | PPP2R2B    | 0.493  | 6.74  | 5.48E-07 | 0.000773  | 6.14 |
| ILMN_37324 | o5SX5IAp1T7vFU0dBc | C12orf56   | 0.265  | 6.61  | 7.56E-07 | 0.001     | 5.85 |
| ILMN_22135 | E5epfp6l3r3hH956Cc | SQSTM1     | -0.262 | -6.55 | 8.64E-07 | 0.00104   | 5.73 |
| ILMN_9965  | r5KQanEn88uvdwe63U | FOXQ1      | 0.315  | 6.55  | 8.73E-07 | 0.00104   | 5.72 |
| ILMN_18243 | oKnZ5_l5v5.8_7Nb1U | VEZF1      | 0.273  | 6.33  | 1.46E-06 | 0.0016    | 5.25 |
| ILMN_3663  | Q1T_A_emeelo5P.i.s | MAFB       | 0.282  | 6.31  | 1.54E-06 | 0.0016    | 5.21 |
| ILMN_9313  | 0Y70inv15JOz9TpURI | FGFBP1     | -0.311 | -6.31 | 1.56E-06 | 0.0016    | 5.19 |
| ILMN_25095 | 9lXuFd0fFWIXR.PEIO | FXYD3      | 0.35   | 6.21  | 2.00E-06 | 0.00196   | 4.97 |
| ILMN_3189  | N_SiAbV_UdVHdNKULo | KRT15      | 0.788  | 6.15  | 2.26E-06 | 0.00206   | 4.86 |
| ILMN_16009 | uty7Pd9EuUoCLr95u4 | FZD10      | 0.544  | 6.14  | 2.34E-06 | 0.00206   | 4.83 |
| ILMN_26449 | ZTR4FSClq65U4uiOUo | C12orf54   | -0.148 | -6.13 | 2.38E-06 | 0.00206   | 4.81 |
| ILMN_12938 | upWX307QohTkj44igk | SLU7       | -0.207 | -6.08 | 2.74E-06 | 0.00229   | 4.68 |
| ILMN_12652 | ofCQXnSrRt1BKSyLQo | OLFML2A    | 0.373  | 5.97  | 3.57E-06 | 0.0028    | 4.44 |
| ILMN_8973  | 9qfuiAJt_63mL3iUHo | SFTPD      | 0.401  | 5.97  | 3.60E-06 | 0.0028    | 4.44 |
| ILMN_2357  | irb__6e8D.AeU5HafU | FOXA2      | -0.288 | -5.93 | 3.89E-06 | 0.00292   | 4.37 |
| ILMN_18064 | QqKkJ6PxK0aeh4Opf8 | PAFAH1B1   | 0.315  | 5.91  | 4.11E-06 | 0.00299   | 4.32 |
| ILMN_10249 | 3xSn94dedyj3RRsenl | UGT1A6     | 0.29   | 5.89  | 4.32E-06 | 0.00304   | 4.27 |
| ILMN_8426  | WqOfok7txh9iMOH96U | OAT        | -0.284 | -5.87 | 4.54E-06 | 0.0031    | 4.22 |

|             |                    |               |        |       |          |         |      |
|-------------|--------------------|---------------|--------|-------|----------|---------|------|
| ILMN_23792  | liiuX3qzd7vrs3uU_k | C6orf117      | 0.325  | 5.85  | 4.79E-06 | 0.00318 | 4.18 |
| ILMN_3370   | HkE1w_nS5G.pDLlJe0 | UCHL5         | -0.265 | -5.83 | 5.01E-06 | 0.00323 | 4.13 |
| ILMN_129439 | QuksruoJb5CSzdUlul | PDE3B         | 0.193  | 5.79  | 5.50E-06 | 0.00342 | 4.05 |
| ILMN_27948  | WXLvRBh86gJ6.vXhXk | GLT8D2        | 0.19   | 5.79  | 5.62E-06 | 0.00342 | 4.03 |
| ILMN_19612  | WXaqXqgvu77ktLANdU | ZNF358        | 0.311  | 5.78  | 5.76E-06 | 0.00342 | 4.01 |
| ILMN_11392  | 0k.d1Qvieww7v_j9XU | SOX21         | 0.718  | 5.76  | 5.96E-06 | 0.00344 | 3.98 |
| ILMN_24093  | 0E7nlcSRXut9djAqBQ | GPC3          | 0.488  | 5.73  | 6.39E-06 | 0.00352 | 3.91 |
| ILMN_139385 | BlzT15PXH_Kt005Ueo | SUSD4         | 0.291  | 5.73  | 6.41E-06 | 0.00352 | 3.91 |
| ILMN_28575  | xniZB5VN4UeHQMYHn4 | WDR41         | 0.261  | 5.61  | 8.63E-06 | 0.00463 | 3.64 |
| ILMN_6390   | fqVKXRT1C3UVf3IUMA | ALDH3A1       | 0.531  | 5.59  | 9.20E-06 | 0.0048  | 3.58 |
| ILMN_27397  | lUUh_2Ro5IAfDoo4o  | C21orf34      | 0.149  | 5.58  | 9.37E-06 | 0.0048  | 3.56 |
| ILMN_18818  | KoedxIITSUHkYltSo  | MATE2         | 0.495  | 5.51  | 1.13E-05 | 0.00564 | 3.4  |
| ILMN_30263  | cX8.55_OOlqKnnIEh4 | CHUK          | -0.333 | -5.5  | 1.16E-05 | 0.00567 | 3.37 |
| ILMN_101745 | 60qOKuKCuCKtXCqfQ  | NA            | 0.195  | 5.48  | 1.21E-05 | 0.00579 | 3.33 |
| ILMN_13490  | WdkTddf7r1H1XuSNuo | KARCA1        | 0.275  | 5.46  | 1.29E-05 | 0.00604 | 3.28 |
| ILMN_22069  | QIJ7c2p1JrTtaSKAqY | HIST2H4A      | 0.434  | 5.42  | 1.41E-05 | 0.00647 | 3.19 |
| ILMN_137045 | x4v3t.fk3Qlpa5XYWU | GAL           | -0.365 | -5.37 | 1.58E-05 | 0.00699 | 3.09 |
| ILMN_21212  | uske9697_RILqilMCI | FAM43A        | 0.279  | 5.37  | 1.58E-05 | 0.00699 | 3.09 |
| ILMN_10621  | ojrlmSOVFHgluH_EI4 | CASP1         | 0.275  | 5.33  | 1.75E-05 | 0.00757 | 3    |
| ILMN_34065  | WZNV5dTXLAh1_c55J4 | LOC649970     | 0.304  | 5.29  | 1.98E-05 | 0.00837 | 2.88 |
| ILMN_9686   | ucr0UvioT_j71R9_p4 | SERPINB13     | 0.172  | 5.28  | 2.01E-05 | 0.00837 | 2.87 |
| ILMN_42657  | EH07iSk6rdXiJ4wWoA | KIAA1644      | -0.207 | -5.27 | 2.06E-05 | 0.00841 | 2.84 |
| ILMN_15591  | HSKDbkS0AV.k1vsng8 | PRO1853       | -0.201 | -5.26 | 2.09E-05 | 0.00841 | 2.83 |
| ILMN_137008 | 0dUy91Zt6_IW7vX.XM | ATP5G2        | 0.286  | 5.25  | 2.17E-05 | 0.00857 | 2.8  |
| ILMN_1523   | NateJLkjswwyld_gQ  | SNRPA1        | -0.298 | -5.23 | 2.26E-05 | 0.00878 | 2.76 |
| ILMN_26764  | Bq5jX_ewHoiFLVASKo | MTMR15        | 0.242  | 5.2   | 2.48E-05 | 0.0091  | 2.67 |
| ILMN_29906  | fgexZ3f.pSdRXVhgpQ | AATF          | -0.238 | -5.19 | 2.50E-05 | 0.0091  | 2.67 |
| ILMN_14915  | uihtWnqOC3rrq2wvyg | IER3          | -0.319 | -5.19 | 2.52E-05 | 0.0091  | 2.66 |
| ILMN_20473  | l3q66JaX566f6qV6fU | KRT6A         | 0.341  | 5.18  | 2.55E-05 | 0.0091  | 2.65 |
| ILMN_139249 | uFKnit46gofh1K5ljk | ATP6V1C2      | 0.284  | 5.18  | 2.58E-05 | 0.0091  | 2.64 |
| ILMN_18538  | odYWE0aJfQk9TxIU0  | H19           | 0.326  | 5.18  | 2.58E-05 | 0.0091  | 2.64 |
| ILMN_12928  | BdXIXor7fQnuh96j_Q | DUSP5         | -0.337 | -5.17 | 2.65E-05 | 0.0092  | 2.61 |
| ILMN_8954   | rlSFe7XE9UrnEQL.SE | UGT1A6        | 0.243  | 5.14  | 2.86E-05 | 0.00975 | 2.54 |
| ILMN_7980   | QXiUeUE.V99S_Rz3io | PPARG         | -0.264 | -5.13 | 2.90E-05 | 0.00975 | 2.53 |
| ILMN_25334  | fXnHfgen5fp3_J1f_c | C17orf61      | 0.2    | 5.11  | 3.04E-05 | 0.0101  | 2.49 |
| ILMN_28506  | 3lFTfn5C7k69DV0TUo | DKFZP564O0823 | 0.21   | 5.08  | 3.34E-05 | 0.0108  | 2.4  |

|             |                     |           |        |       |          |        |      |
|-------------|---------------------|-----------|--------|-------|----------|--------|------|
| ILMN_421    | BkFhkGnyH2HSjUtXxE  | SLC2A1    | 0.245  | 5.08  | 3.35E-05 | 0.0108 | 2.4  |
| ILMN_108758 | H2peEEZMa8KT5Rcfbo  | NA        | -0.196 | -5.05 | 3.56E-05 | 0.0113 | 2.34 |
| ILMN_11081  | uloEAOK7sgSrVEr_qE  | ADAMTS1   | -0.185 | -5.02 | 3.90E-05 | 0.0122 | 2.26 |
| ILMN_1051   | ud5ejnv7rxavidS3OI  | NUP155    | -0.28  | -4.97 | 4.38E-05 | 0.0135 | 2.15 |
| ILMN_111840 | 9psRNEH8BVtbHgl5tY  | LOC401561 | 0.383  | 4.95  | 4.58E-05 | 0.0139 | 2.11 |
| ILMN_6685   | 36HqUBcKuCun2qtuug  | NCL       | -0.391 | -4.94 | 4.81E-05 | 0.0144 | 2.07 |
| ILMN_9651   | rArpuh1f7urqv7qy64  | TNFRSF21  | -0.27  | -4.92 | 4.95E-05 | 0.0146 | 2.04 |
| ILMN_6581   | uRT.npF.eCy77VrNJc  | WDR33     | 0.218  | 4.92  | 4.97E-05 | 0.0146 | 2.04 |
| ILMN_13354  | Kleqv0tN1U.rVeh7f4  | BRD2      | 0.257  | 4.91  | 5.16E-05 | 0.0146 | 2    |
| ILMN_7599   | uein.0.eT1eEudTIso  | MARVELD3  | -0.228 | -4.91 | 5.18E-05 | 0.0146 | 2    |
| ILMN_20951  | 0Si_60s7deRJ6gUY3E  | SUCLG1    | 0.209  | 4.9   | 5.26E-05 | 0.0146 | 1.98 |
| ILMN_36910  | 9h.oUwVaCUBd7iTRL8  | NA        | -0.265 | -4.9  | 5.30E-05 | 0.0146 | 1.98 |
| ILMN_14653  | QioV_nXu3rURFEgn7M  | VSNL1     | 0.209  | 4.9   | 5.31E-05 | 0.0146 | 1.98 |
| ILMN_18576  | 6ur92ermG4P7gnSjIQ  | DNAJC12   | -0.112 | -4.88 | 5.55E-05 | 0.0151 | 1.94 |
| ILMN_2030   | ZiG.UjSVC.HMiHpUpE  | LRP8      | -0.265 | -4.85 | 5.96E-05 | 0.016  | 1.87 |
| ILMN_18286  | xm60reewT9UUHd_e1E  | CBLB      | 0.339  | 4.84  | 6.05E-05 | 0.016  | 1.86 |
| ILMN_17359  | imv6qJecg7ROjp7TKo  | BCL11A    | 0.2    | 4.84  | 6.15E-05 | 0.0161 | 1.84 |
| ILMN_1695   | cXQeqnZ8u6eeuoACSI  | CHMP2A    | 0.192  | 4.83  | 6.33E-05 | 0.0163 | 1.82 |
| ILMN_10357  | TektKXlp6be5L6qKSw  | NOC2L     | -0.223 | -4.82 | 6.38E-05 | 0.0163 | 1.81 |
| ILMN_1956   | ZozS5eIROIgSNTER.g  | GBP6      | 0.294  | 4.82  | 6.49E-05 | 0.0164 | 1.79 |
| ILMN_920    | 3Una1dSkCiAah8fRKE  | LANCL2    | 0.217  | 4.81  | 6.66E-05 | 0.0167 | 1.77 |
| ILMN_18897  | QQwfnu6CSaqCFyBX9U  | FGF19     | -0.133 | -4.8  | 6.83E-05 | 0.0169 | 1.75 |
| ILMN_6717   | 0kno.2xFVK.4WBGw54  | STT3B     | -0.237 | -4.78 | 7.08E-05 | 0.0172 | 1.71 |
| ILMN_28555  | 3F4dNSe19AydDbdXcVI | CHST7     | 0.219  | 4.78  | 7.10E-05 | 0.0172 | 1.71 |
| ILMN_5859   | T6S7IfAlf0sjir7Soo  | ZNF512    | 0.275  | 4.77  | 7.33E-05 | 0.0176 | 1.68 |
| ILMN_5464   | Qd6pkoqlL5wuere9Po  | ZCWPW1    | 0.226  | 4.76  | 7.57E-05 | 0.0178 | 1.65 |
| ILMN_10714  | T5MrCNdjeu93m6e8qE  | KLHL3     | 0.213  | 4.75  | 7.67E-05 | 0.0178 | 1.64 |
| ILMN_79545  | EzsLgUzq4l3n91eEmc  | RYK       | -0.241 | -4.75 | 7.71E-05 | 0.0178 | 1.63 |
| ILMN_8469   | HRHtFKvP5NQqJ6D4sU  | BAMBI     | 0.473  | 4.75  | 7.74E-05 | 0.0178 | 1.63 |
| ILMN_116115 | Q2WKlqoUj8rsxtHjng  | NA        | 0.126  | 4.74  | 7.96E-05 | 0.0181 | 1.6  |
| ILMN_30096  | ceF_X1KXFDJINDU3tU  | KIAA0391  | -0.348 | -4.73 | 8.19E-05 | 0.0185 | 1.58 |
| ILMN_82745  | ZqGuyopTrQf_JxX4qA  | NA        | -0.201 | -4.72 | 8.39E-05 | 0.0187 | 1.56 |
| ILMN_18641  | Wrk6B7r5QrPwCp.XI0  | HEY1      | 0.319  | 4.71  | 8.48E-05 | 0.0187 | 1.55 |
| ILMN_3183   | WF7r8C2nuF17VSJ7Gk  | SLCO4A1   | -0.36  | -4.7  | 8.66E-05 | 0.0189 | 1.53 |
| ILMN_3168   | KQpKCINTUXd6EsOuSQ  | PTPRZ1    | 0.273  | 4.7   | 8.84E-05 | 0.0189 | 1.51 |
| ILMN_24834  | uFiFdP.ptPecs_6SgQ  | SLC30A5   | -0.207 | -4.69 | 8.90E-05 | 0.0189 | 1.5  |



|             |                    |               |        |       |          |        |       |
|-------------|--------------------|---------------|--------|-------|----------|--------|-------|
| ILMN_14412  | WnvYXotJcQZfQWfXk4 | VPS28         | 0.244  | 4.69  | 8.97E-05 | 0.0189 | 1.5   |
| ILMN_137235 | 9me1qEdzyOp53d8d0  | DLX5          | 0.354  | 4.69  | 9.00E-05 | 0.0189 | 1.49  |
| ILMN_26788  | 0qqATDhKVV1F315J78 | LOC374395     | 0.229  | 4.69  | 9.03E-05 | 0.0189 | 1.49  |
| ILMN_9057   | fSUyR.vR7Xu0iR4nUU | TXNIP         | 0.606  | 4.68  | 9.15E-05 | 0.0189 | 1.48  |
| ILMN_1407   | Eqj_iqkpAtAuDhd7UU | SNAPAP        | 0.249  | 4.68  | 9.32E-05 | 0.019  | 1.46  |
| ILMN_23985  | TqCLahRL88UPeKC1I8 | MAD2L1        | -0.33  | -4.67 | 9.36E-05 | 0.019  | 1.46  |
| ILMN_15421  | 6R7R.SJ2unRJ15Vr8  | GNA15         | -0.184 | -4.65 | 9.93E-05 | 0.02   | 1.4   |
| ILMN_28273  | 6DjoKCHq_Soe63deqU | FGFRL1        | -0.279 | -4.64 | 0.000101 | 0.0201 | 1.39  |
| ILMN_1491   | 9aklvNW6.DAnImZ0UI | FLJ22531      | 0.274  | 4.64  | 0.000102 | 0.0201 | 1.38  |
| ILMN_15712  | i1LnXep34vnn4PluyE | UBADC1        | 0.269  | 4.64  | 0.000102 | 0.0201 | 1.37  |
| ILMN_21460  | 6uiuCguiS0iiW6MOgo | PMS2L3        | -0.175 | -4.61 | 0.00011  | 0.0211 | 1.31  |
| ILMN_23495  | WSJVRO.eRHere566BM | COMMD7        | 0.2    | 4.6   | 0.000112 | 0.0211 | 1.29  |
| ILMN_5038   | Q3h9M3uo1EQ6orHpfo | DKFZp451M2119 | 0.361  | 4.6   | 0.000112 | 0.0211 | 1.29  |
| ILMN_27253  | KWaSe3.5xzCoPelFeo | CCNF          | -0.372 | -4.6  | 0.000113 | 0.0211 | 1.29  |
| ILMN_42423  | QKFARVRVj4heauedxA | NA            | -0.275 | -4.6  | 0.000114 | 0.0211 | 1.28  |
| ILMN_12148  | HugJshCiOSs_uLaNkk | BCL2L1        | -0.245 | -4.6  | 0.000114 | 0.0211 | 1.27  |
| ILMN_6563   | iZauVnkv36hMomQIJw | CEBPD         | -0.173 | -4.6  | 0.000114 | 0.0211 | 1.27  |
| ILMN_12568  | QLk_xlf6Ut_zuX41Bk | FLRT3         | 0.196  | 4.59  | 0.000116 | 0.0212 | 1.26  |
| ILMN_28991  | Tol53Cksg66eol7gol | LAMC2         | -0.134 | -4.58 | 0.000119 | 0.0216 | 1.24  |
| ILMN_24765  | NeiuSJRAZH9qly.52A | SP8           | 0.363  | 4.56  | 0.000126 | 0.0227 | 1.18  |
| ILMN_5938   | 9US36el0Co4kEqH3IE | PPFIBP2       | 0.236  | 4.55  | 0.000128 | 0.0228 | 1.17  |
| ILMN_14571  | ck7K7urh53ueZfdOng | SLC4A11       | -0.219 | -4.55 | 0.000128 | 0.0228 | 1.17  |
| ILMN_15497  | KqS0wne.VXdVAI9JgY | SUMF1         | 0.188  | 4.53  | 0.000137 | 0.0241 | 1.11  |
| ILMN_17486  | Tu6lgXjF5eoSUegH.o | PRODH         | 0.257  | 4.52  | 0.000138 | 0.0241 | 1.1   |
| ILMN_21283  | ZVlrpX78S4odpR7t3s | MNT           | -0.256 | -4.51 | 0.000142 | 0.0245 | 1.08  |
| ILMN_3399   | 6Nd4gBJUSh6tdfNbfk | C12orf41      | 0.343  | 4.5   | 0.000145 | 0.0249 | 1.06  |
| ILMN_22604  | H3iFCp_fheOP9fSd3g | KIAA1826      | 0.274  | 4.5   | 0.000146 | 0.0249 | 1.04  |
| ILMN_18065  | 6qd3g1xev30p96H5yk | LOC144233     | 0.309  | 4.49  | 0.000148 | 0.0249 | 1.04  |
| ILMN_16064  | EHGUK_J69dUVeel1cg | ATP5L         | 0.327  | 4.49  | 0.000149 | 0.0249 | 1.03  |
| ILMN_2023   | KO51fUnriKKLyJ62.4 | IDS           | -0.18  | -4.49 | 0.00015  | 0.0249 | 1.02  |
| ILMN_17848  | rpPpSo17oF33L0qu4k | CD109         | 0.152  | 4.49  | 0.00015  | 0.0249 | 1.02  |
| ILMN_30033  | 06Tt_Ktf37yi.NeUIQ | ILDR1         | 0.287  | 4.49  | 0.000151 | 0.0249 | 1.02  |
| ILMN_19169  | rla5l9zxP5cE3_hukg | MRPL3         | -0.202 | -4.48 | 0.000153 | 0.0249 | 1.01  |
| ILMN_19314  | rkiktz5Chff55S80yk | EIF4G2        | -0.237 | -4.48 | 0.000154 | 0.0249 | 1     |
| ILMN_7846   | cj3ouCSO8dhf_3VKe4 | MRPS30        | -0.24  | -4.46 | 0.00016  | 0.0256 | 0.964 |
| ILMN_9220   | lv.m6i7uXm6u7m7_r8 | SIAH1         | 0.285  | 4.46  | 0.00016  | 0.0256 | 0.962 |

|             |                    |           |        |       |          |        |       |
|-------------|--------------------|-----------|--------|-------|----------|--------|-------|
| ILMN_26487  | NJoDUIHXLHeFJSpSpl | DHRS7B    | 0.222  | 4.45  | 0.000164 | 0.026  | 0.941 |
| ILMN_2508   | r5zqnylOdLnqhKL.IQ | MRPS18A   | 0.181  | 4.45  | 0.000167 | 0.0263 | 0.927 |
| ILMN_3186   | uor8nTo_mnU9yXf6sU | ACTL6A    | -0.222 | -4.43 | 0.000175 | 0.0274 | 0.882 |
| ILMN_20959  | 9p8ZfZ13LiqDiXjhHM | PCDH19    | 0.275  | 4.42  | 0.000177 | 0.0275 | 0.87  |
| ILMN_24514  | KEoF6iEBF4SgpeK_Vs | CXorf38   | -0.163 | -4.41 | 0.000181 | 0.028  | 0.848 |
| ILMN_6157   | 93qBFQhLgK7TTUqjWY | NRP2      | -0.139 | -4.41 | 0.000185 | 0.0284 | 0.831 |
| ILMN_13350  | NnekUL0Df11U.uJ7qE | ZNF323    | 0.25   | 4.4   | 0.000186 | 0.0284 | 0.823 |
| ILMN_18326  | ZO6IOuzJVTV4wKJbCk | GALNT5    | -0.196 | -4.39 | 0.000191 | 0.0289 | 0.801 |
| ILMN_1402   | odNytG79eOhepUOtlo | MSRB2     | 0.298  | 4.38  | 0.000197 | 0.0294 | 0.775 |
| ILMN_18684  | BkpeHhSu3TTII8CEh4 | ARL6IP2   | -0.191 | -4.38 | 0.000197 | 0.0294 | 0.774 |
| ILMN_37799  | Zl3fbpPwEldE3Vf8el | NA        | 0.147  | 4.37  | 0.000204 | 0.0302 | 0.742 |
| ILMN_29029  | NkEC1YkOC01HXk3r60 | CFD       | 0.251  | 4.36  | 0.000209 | 0.0304 | 0.719 |
| ILMN_6435   | 6eipewbvKnd0.olc1c | AKR1B10   | 0.155  | 4.35  | 0.000211 | 0.0304 | 0.709 |
| ILMN_6383   | iAdwVL3tXonu4VaEKU | ETFB      | 0.191  | 4.35  | 0.000213 | 0.0304 | 0.702 |
| ILMN_558    | TnqJL5KUS4Lu_fe0fw | TRAPPC2   | 0.218  | 4.35  | 0.000213 | 0.0304 | 0.701 |
| ILMN_8340   | T73f_VsrqKuqPnm1yc | MYADM     | -0.266 | -4.35 | 0.000213 | 0.0304 | 0.7   |
| ILMN_7184   | 3qSjV6EfGxDn255eOE | SYTL1     | 0.245  | 4.35  | 0.000214 | 0.0304 | 0.698 |
| ILMN_21403  | ZlekT1T_57rs17v1_0 | CPA4      | -0.206 | -4.35 | 0.000214 | 0.0304 | 0.695 |
| ILMN_7731   | fF5976WihjleBd_ix8 | LOC400566 | 0.211  | 4.35  | 0.000216 | 0.0304 | 0.689 |
| ILMN_14021  | i0NA17XLu5Lt9pXuhE | EHD4      | -0.292 | -4.33 | 0.000222 | 0.0311 | 0.661 |
| ILMN_14837  | TI6K7grns1aA3N6Feg | FHOD1     | -0.208 | -4.33 | 0.000224 | 0.0311 | 0.657 |
| ILMN_134510 | Wr9CXo4eog45RyqogQ | KIF2A     | 0.16   | 4.33  | 0.000227 | 0.0313 | 0.642 |
| ILMN_2430   | lkqhK3QtVJmREqBAQ  | PDE6D     | 0.184  | 4.33  | 0.000228 | 0.0313 | 0.64  |
| ILMN_15231  | ZUCXcuxfXXfHTU1S0E | HCP5      | 0.274  | 4.32  | 0.00023  | 0.0315 | 0.629 |
| ILMN_9515   | NTDupl.p0nX04jStLo | SNCAIP    | 0.211  | 4.31  | 0.000239 | 0.0319 | 0.597 |
| ILMN_777    | HnepfRIOOkX1wFdOro | GPX2      | 0.254  | 4.31  | 0.00024  | 0.0319 | 0.592 |
| ILMN_15655  | cndSXiQSJaFe3RQKAA | COX19     | 0.276  | 4.3   | 0.000242 | 0.0319 | 0.586 |
| ILMN_5727   | uV7ued.rpMIKh6e7z0 | SFT2D1    | -0.269 | -4.3  | 0.000242 | 0.0319 | 0.583 |
| ILMN_24748  | IGlfnIFBOiH_xbtW98 | DC2       | 0.232  | 4.3   | 0.000243 | 0.0319 | 0.581 |
| ILMN_19158  | WkXHGXfrHvQnuojEms | 76P       | -0.232 | -4.3  | 0.000243 | 0.0319 | 0.579 |
| ILMN_84965  | ollioMqliuop43vbpU | NA        | -0.301 | -4.3  | 0.000246 | 0.0319 | 0.57  |
| ILMN_3827   | KnEn78Gku09V.kew4o | EFNB2     | 0.206  | 4.3   | 0.000246 | 0.0319 | 0.569 |
| ILMN_5529   | WBf1LPrE36felQFUJI | ZNF294    | -0.199 | -4.29 | 0.000247 | 0.0319 | 0.567 |
| ILMN_138674 | QZQ01RTMF9j7n3QdRU | SH3BP4    | -0.2   | -4.29 | 0.000249 | 0.0321 | 0.558 |
| ILMN_138760 | xVyKdhRIMOUtFFeBkQ | DLX1      | -0.194 | -4.29 | 0.00025  | 0.0321 | 0.553 |
| ILMN_2369   | cpJL9454pL_Q1ThB6M | PLA2G4A   | -0.251 | -4.26 | 0.00027  | 0.0342 | 0.484 |

|             |                    |           |        |       |          |        |       |
|-------------|--------------------|-----------|--------|-------|----------|--------|-------|
| ILMN_16193  | rqaOSp6rTezeCVdoMA | DHRS13    | 0.229  | 4.26  | 0.00027  | 0.0342 | 0.483 |
| ILMN_21009  | ThQrKUtdVBRzndS7FQ | NFE2L3    | -0.25  | -4.25 | 0.000278 | 0.0349 | 0.455 |
| ILMN_7405   | uVNSTu7t3N_TcXnX6U | MAPK10    | 0.161  | 4.25  | 0.000279 | 0.0349 | 0.452 |
| ILMN_3055   | N7R5zufUVmWotUetyA | LOC124446 | 0.207  | 4.24  | 0.00028  | 0.0349 | 0.449 |
| ILMN_3402   | KTSJLp6pHoLO16okOQ | CPEB2     | 0.128  | 4.24  | 0.000283 | 0.035  | 0.44  |
| ILMN_9629   | TgRLrHOK2qTxHlzlCk | USP16     | -0.183 | -4.23 | 0.000289 | 0.0356 | 0.421 |
| ILMN_10248  | 3tnnXimOOpCgiiPmaM | TCEA2     | 0.3    | 4.23  | 0.000294 | 0.0357 | 0.406 |
| ILMN_1962   | IgiQKueA4fsa_nrn90 | KLHDC5    | 0.25   | 4.22  | 0.000295 | 0.0357 | 0.403 |
| ILMN_19282  | xU75QpS3gNep0LjXXk | GART      | -0.288 | -4.22 | 0.000295 | 0.0357 | 0.403 |
| ILMN_21476  | HeOif1xSFeA9GTsmag | KATNAL2   | 0.138  | 4.22  | 0.000298 | 0.036  | 0.392 |
| ILMN_26010  | Z590t9JSKip7z9SK5k | DAP       | 0.293  | 4.22  | 3.00E-04 | 0.036  | 0.386 |
| ILMN_16111  | 3nivfFvk55Rd18lLk  | C1orf116  | -0.247 | -4.21 | 0.000302 | 0.036  | 0.38  |
| ILMN_18952  | iiHrXr.vV.rEhd_0uc | GTF2E1    | -0.184 | -4.21 | 0.000307 | 0.0363 | 0.367 |
| ILMN_3927   | ZunPhR2k868t4PIR54 | C9orf66   | 0.239  | 4.21  | 0.000308 | 0.0363 | 0.362 |
| ILMN_2367   | 0uXT1.VFCDU3yZdeUk | LYK5      | 0.223  | 4.21  | 0.000309 | 0.0363 | 0.36  |
| ILMN_27537  | cN3p4qOHxe9LHcQ9d4 | HSP90AA1  | -0.411 | -4.2  | 0.000311 | 0.0363 | 0.353 |
| ILMN_22610  | fiqeVovq1_Xo.4RJB8 | TRIM8     | 0.186  | 4.2   | 0.000316 | 0.0366 | 0.338 |
| ILMN_22421  | BQof3gl0fOI5eCUpTo | CR2       | -0.147 | -4.2  | 0.000317 | 0.0366 | 0.336 |
| ILMN_16205  | uuQv3UvqO_3eVr6F10 | GOT2      | -0.255 | -4.19 | 0.000318 | 0.0366 | 0.333 |
| ILMN_24204  | 0RjkK6ldY4Q4odooi4 | CLUAP1    | 0.184  | 4.19  | 0.000323 | 0.0368 | 0.319 |
| ILMN_3488   | K4I1UHnUI3lnIOf4tQ | SCGB1A1   | 0.189  | 4.19  | 0.000325 | 0.0368 | 0.313 |
| ILMN_2335   | KjupQtR7XX6aQCVPgg | TAGLN     | -0.383 | -4.18 | 0.000326 | 0.0368 | 0.31  |
| ILMN_12943  | Tpe.T8.s83l61eKbeo | TMEM98    | 0.184  | 4.18  | 0.000326 | 0.0368 | 0.309 |
| ILMN_12614  | xRERI9QrpCcQRd4HpE | ZNF750    | 0.199  | 4.18  | 0.000331 | 0.0371 | 0.297 |
| ILMN_19665  | 33dt4IVKX.Uf4qK59g | CES2      | 0.236  | 4.18  | 0.000334 | 0.0372 | 0.289 |
| ILMN_25630  | i65p6U6lCeH6eu6xlg | MAT2A     | 0.476  | 4.17  | 0.000341 | 0.0377 | 0.27  |
| ILMN_13555  | x3VEolqiSEqA3lxQio | TMEM79    | 0.256  | 4.17  | 0.000341 | 0.0377 | 0.269 |
| ILMN_3162   | 3LV5rVlyXg15Wi6CeA | TIMP1     | -0.257 | -4.16 | 0.000344 | 0.0378 | 0.262 |
| ILMN_27351  | ER6dKLhJWD5fEs0QKk | C14orf149 | -0.171 | -4.16 | 0.00035  | 0.038  | 0.245 |
| ILMN_7444   | 6aaey6nd9dfUW4VQXc | UBE2S     | -0.257 | -4.16 | 0.00035  | 0.038  | 0.245 |
| ILMN_4348   | QuCQeDfSTvdNpol9_4 | AUTS2     | 0.138  | 4.16  | 0.000351 | 0.038  | 0.244 |
| ILMN_14255  | TLuqfizk6P_s3kqteo | NA        | 0.133  | 4.15  | 0.000353 | 0.0381 | 0.237 |
| ILMN_18647  | 6KhTnqXeZd7EFHnWB0 | SLC22A18  | 0.163  | 4.15  | 0.000358 | 0.0384 | 0.225 |
| ILMN_4989   | Qpt0ed0q9KyDvnr.ik | C17orf59  | 0.215  | 4.14  | 0.000363 | 0.0388 | 0.211 |
| ILMN_138451 | 00g6Loa0X10ffPnDdQ | FAM91A1   | -0.271 | -4.14 | 0.000369 | 0.039  | 0.197 |
| ILMN_103501 | NnglJ17X.NQB6su1JQ | NA        | -0.133 | -4.14 | 0.00037  | 0.039  | 0.195 |

|             |                    |           |        |       |          |        |         |
|-------------|--------------------|-----------|--------|-------|----------|--------|---------|
| ILMN_15639  | QniJVJ4ToDEvvpdaXU | CTSD      | 0.265  | 4.13  | 0.00037  | 0.039  | 0.195   |
| ILMN_27156  | WlpdLtTve7bEZ_Aizg | HPS3      | -0.276 | -4.13 | 0.000375 | 0.0393 | 0.183   |
| ILMN_20957  | Bo6vH5UUGelctUHX5s | WBP1      | 0.267  | 4.13  | 0.000376 | 0.0393 | 0.179   |
| ILMN_11739  | xXQSIsoqC7iZfrOHwA | IRF1      | 0.184  | 4.12  | 0.000383 | 0.0396 | 0.162   |
| ILMN_7276   | NERV5_oVyczk.zuF_U | DFNA5     | -0.243 | -4.12 | 0.000385 | 0.0396 | 0.159   |
| ILMN_17160  | WV_I5R.UrtfzR.hqHc | SH3PXD2A  | 0.244  | 4.12  | 0.000385 | 0.0396 | 0.157   |
| ILMN_12370  | rd42yg_KLtWX7p4geg | SFN       | -0.287 | -4.12 | 0.000386 | 0.0396 | 0.155   |
| ILMN_25780  | il3cSST7R7op9wIA6E | PCDH7     | 0.219  | 4.11  | 0.000391 | 0.0399 | 0.143   |
| ILMN_14234  | opVEIXnh0AQcOB3oJU | NA        | 0.344  | 4.1   | 0.000401 | 0.0406 | 0.12    |
| ILMN_11895  | HlI890SQIXy1UJV1Vw | RYS1      | 0.14   | 4.1   | 0.000402 | 0.0406 | 0.117   |
| ILMN_16484  | lmp__6CNF._MV5R2C0 | LRRC8D    | 0.194  | 4.1   | 0.000404 | 0.0406 | 0.113   |
| ILMN_18558  | cqcdO17JS9NdMMIOpl | GSTA4     | 0.255  | 4.1   | 0.000405 | 0.0406 | 0.111   |
| ILMN_1807   | NoEh4gqQE9eonqQojU | NR1H3     | 0.215  | 4.1   | 0.000407 | 0.0406 | 0.107   |
| ILMN_9690   | B3O119RVC1aNHZ7.ek | SLC37A2   | -0.151 | -4.09 | 0.000413 | 0.041  | 0.0939  |
| ILMN_18139  | oKtUJLUiCO3u6f1dXk | UBQLN4    | -0.183 | -4.08 | 0.000422 | 0.0417 | 0.0744  |
| ILMN_27552  | Hd8dyud.rilSn_9370 | PPM1E     | -0.192 | -4.07 | 0.000432 | 0.0425 | 0.0519  |
| ILMN_17770  | rOTSdl6h6d7jACFXVk | KLHL22    | 0.21   | 4.06  | 0.000442 | 0.0432 | 0.0309  |
| ILMN_5987   | iAjhVKE.nr976Uvylo | ALG11     | -0.139 | -4.06 | 0.000443 | 0.0432 | 0.03    |
| ILMN_26493  | 33obrCQopAnZlAmA1Y | HIST1H2AC | 0.164  | 4.06  | 0.000445 | 0.0432 | 0.0249  |
| ILMN_2607   | xjIJ93dSrny_n_VFXQ | JUP       | 0.257  | 4.06  | 0.000452 | 0.0437 | 0.011   |
| ILMN_1092   | BqIVUT0lon9KY3ogIE | LAMB3     | 0.171  | 4.05  | 0.000463 | 0.0446 | -0.0104 |
| ILMN_4651   | 6pM_m9e5zjqe7jllo  | MRPL39    | -0.237 | -4.04 | 0.000466 | 0.0447 | -0.0176 |
| ILMN_25905  | rZ1e6.uVHnQxJdY10c | AP3S2     | 0.273  | 4.04  | 0.000469 | 0.0448 | -0.0237 |
| ILMN_26003  | 3qnFKAmXUFckAuQjqg | NUPR1     | 0.4    | 4.03  | 0.00048  | 0.0456 | -0.0437 |
| ILMN_28045  | 3jXvhFUBUEKKCXqC5U | SLPI      | 0.17   | 4.03  | 0.000481 | 0.0456 | -0.0462 |
| ILMN_2465   | x0CfooGqipWoO1e3kY | KRT86     | -0.124 | -4.03 | 0.000488 | 0.0461 | -0.0599 |
| ILMN_856    | f5e2Tv7t5dvV1Xrl7s | CAMK2B    | 0.299  | 4.02  | 0.000496 | 0.0465 | -0.0745 |
| ILMN_99086  | WCX_zu10qplWH8lqFI | FAM119A   | 0.253  | 4.02  | 0.000499 | 0.0465 | -0.0797 |
| ILMN_2007   | HhmlFUpf1IkBeiCPRA | TP53I3    | 0.3    | 4.02  | 0.000499 | 0.0465 | -0.08   |
| ILMN_138009 | Z1JCtr1ul.bEupC8   | NUP50     | -0.194 | -4.01 | 0.000504 | 0.0467 | -0.0882 |
| ILMN_39594  | BVzqJCp4XuHv83UqUE | NA        | 0.225  | 4.01  | 0.000506 | 0.0468 | -0.0927 |
| ILMN_46045  | Ki3pfreTe53VfRAKSk | NA        | 0.319  | 4.01  | 0.000514 | 0.0473 | -0.106  |
| ILMN_11722  | HF1uvR6LwJDapvsSdE | MGC52110  | 0.19   | 4     | 0.000523 | 0.0479 | -0.123  |
| ILMN_11566  | Nrlw71O3gv5VlnEb6I | MAOA      | 0.164  | 3.99  | 0.000531 | 0.0485 | -0.138  |
| ILMN_25404  | 9l_le_Lc3rBHoh1eo  | SPINK1    | -0.101 | -3.99 | 0.000533 | 0.0485 | -0.141  |
| ILMN_3773   | EjUqOiOoK8gKSV0Xel | PLCG1     | -0.179 | -3.99 | 0.000539 | 0.0486 | -0.15   |

|            |                    |           |        |       |          |        |        |
|------------|--------------------|-----------|--------|-------|----------|--------|--------|
| ILMN_14188 | 9le_SKQ.juhPfn2oRE | VPS29     | 0.218  | 3.99  | 0.000539 | 0.0486 | -0.15  |
| ILMN_12569 | BVfNNHlz2d9dSXekFE | LOC113386 | 0.261  | 3.99  | 0.000541 | 0.0486 | -0.154 |
| ILMN_15956 | HuV.XSgvnu.T9.o6Hc | RDH10     | -0.213 | -3.98 | 0.000548 | 0.049  | -0.165 |
| ILMN_33412 | xVHloAfoZFn_gd1ai8 | NA        | -0.121 | -3.98 | 0.000555 | 0.0492 | -0.177 |
| ILMN_12919 | BWeXuR04Aqf6fwqCSc | PPIE      | 0.184  | 3.98  | 0.000555 | 0.0492 | -0.177 |
| ILMN_8673  | NfCKX03INHbt3S4Cnk | DMRT2     | 0.186  | 3.97  | 0.000559 | 0.0494 | -0.183 |
| ILMN_13494 | TuUn0AFY7rqzSikmnw | MELK      | -0.215 | -3.97 | 0.000567 | 0.0499 | -0.196 |

## KYSE180

| ProbeName  | ID                 | GeneSymbol | logFC  | t     | P.Value  | adj.P.Val | B    |
|------------|--------------------|------------|--------|-------|----------|-----------|------|
| ILMN_532   | BhFLTHp0qVFndI8OA0 | TRIM22     | -0.682 | -19.6 | 2.31E-16 | 5.20E-12  | 25.4 |
| ILMN_36318 | 9UuS9Unt1eddx646nA | NA         | -0.885 | -18.9 | 5.69E-16 | 6.42E-12  | 24.7 |
| ILMN_22857 | ueQUrXd5FH554RlhZc | CCL3L3     | -0.764 | -16.6 | 9.63E-15 | 7.24E-11  | 22.4 |
| ILMN_32946 | 0SZL1Se3V513HrjqcM | NA         | -0.622 | -15.7 | 3.45E-14 | 1.63E-10  | 21.4 |
| ILMN_11175 | o3qVxJeiBeiDXEVEgU | BIRC4BP    | -0.506 | -15.6 | 3.84E-14 | 1.63E-10  | 21.3 |
| ILMN_18149 | fju3dEn4A14hJ7fuKg | HLA-B      | -0.785 | -15.5 | 4.34E-14 | 1.63E-10  | 21.2 |
| ILMN_6158  | ogoZKSQIstLV9_neeE | CCL3L1     | -0.518 | -15.2 | 7.64E-14 | 2.46E-10  | 20.7 |
| ILMN_3648  | Ko6INeniO6_OUIXUiA | LOC129607  | -0.498 | -14.5 | 2.14E-13 | 6.03E-10  | 19.9 |
| ILMN_11198 | 05l456hJVnVl7AgZh8 | MT2A       | -0.882 | -14   | 4.38E-13 | 1.00E-09  | 19.2 |
| ILMN_7054  | 3iBX5HloFcRVBXqqDs | OAS2       | -0.386 | -14   | 4.43E-13 | 1.00E-09  | 19.2 |
| ILMN_25320 | fSpP_tQvufNUyUoB3k | IL1A       | -0.555 | -13.6 | 8.17E-13 | 1.63E-09  | 18.7 |
| ILMN_5994  | igVgS9VeuSoulMrp1w | OAS2       | -0.592 | -13.5 | 8.68E-13 | 1.63E-09  | 18.6 |
| ILMN_17824 | Bihnt.kyleqwCS4C6Q | CXCL11     | -0.379 | -13.2 | 1.56E-12 | 2.70E-09  | 18.1 |
| ILMN_9209  | ruhEjVHol1XdeVCR9E | KRT14      | -0.622 | -12.8 | 2.96E-12 | 4.77E-09  | 17.6 |
| ILMN_1999  | xhGpJIS60tf36d54R0 | CCL3       | -0.403 | -12.5 | 5.12E-12 | 7.70E-09  | 17.1 |
| ILMN_15231 | ZUCXcuxfXXfHTU1S0E | HCP5       | -0.768 | -12.1 | 9.54E-12 | 1.34E-08  | 16.5 |
| ILMN_26472 | 0X.iEwX3IRR0aET95c | SOST       | 0.379  | 11.8  | 1.63E-11 | 2.16E-08  | 16   |
| ILMN_24462 | Bppj0CkgYkDjkoioiE | GBP5       | -0.367 | -11.3 | 3.73E-11 | 4.67E-08  | 15.3 |
| ILMN_14624 | NdQiNvJJNLUQEflpUQ | WNT5A      | 0.406  | 10.7  | 1.20E-10 | 1.42E-07  | 14.2 |
| ILMN_7531  | 3XUk9LUqolGgFO9_fA | UBE2L6     | -0.549 | -10.5 | 1.86E-10 | 2.10E-07  | 13.8 |
| ILMN_29986 | TlzucIRAgz7dPJeDuU | PTGS2      | -0.464 | -10.1 | 4.08E-10 | 4.38E-07  | 13.1 |
| ILMN_36377 | ZiiOfneYrSFroguBug | NA         | -0.272 | -9.92 | 5.37E-10 | 5.50E-07  | 12.9 |
| ILMN_15271 | in0n9od69_jbtd1V2U | CITED4     | -0.489 | -9.87 | 5.94E-10 | 5.82E-07  | 12.8 |
| ILMN_73498 | KXukJSQjpXrhJAIB5E | NA         | -0.382 | -9.72 | 7.91E-10 | 7.43E-07  | 12.5 |
| ILMN_28991 | Tol53Cksg66eol7gol | LAMC2      | -0.283 | -9.66 | 9.00E-10 | 8.12E-07  | 12.4 |

|             |                    |           |        |       |          |          |      |
|-------------|--------------------|-----------|--------|-------|----------|----------|------|
| ILMN_14915  | uihtWnqOC3rrq2wvyg | IER3      | -0.585 | -9.5  | 1.22E-09 | 1.06E-06 | 12.1 |
| ILMN_1797   | 055155VOJ7IC7ISp5M | MT1A      | -0.687 | -9.41 | 1.47E-09 | 1.23E-06 | 11.9 |
| ILMN_20440  | WqEQkplDrN6midEi98 | ANGPTL4   | -0.346 | -9.39 | 1.56E-09 | 1.26E-06 | 11.9 |
| ILMN_2829   | HdefXV5T01eVd1OCfg | OAS1      | -0.486 | -9.26 | 2.00E-09 | 1.56E-06 | 11.6 |
| ILMN_7985   | HgCiovEdKeQkuEuVKk | HLA-A     | -0.436 | -9.01 | 3.36E-09 | 2.44E-06 | 11.1 |
| ILMN_19659  | BEUuoPnooFlpH1F_no | LAMC2     | -0.479 | -9.01 | 3.38E-09 | 2.44E-06 | 11.1 |
| ILMN_18673  | fSohbtLKju5enuxurs | LY6E      | -0.61  | -8.99 | 3.51E-09 | 2.44E-06 | 11.1 |
| ILMN_17240  | NeZfUgkrVAwJS5UXgA | OSGIN1    | 0.526  | 8.98  | 3.57E-09 | 2.44E-06 | 11.1 |
| ILMN_9856   | 0XdV3VP_R7u2OQ32ck | MPPED2    | 0.573  | 8.87  | 4.58E-09 | 3.03E-06 | 10.9 |
| ILMN_18760  | f5OhpkpWUh8KhetFGc | ECGF1     | -0.345 | -8.82 | 5.03E-09 | 3.24E-06 | 10.8 |
| ILMN_19272  | r4UKUSJzq7SRSj_CUo | HSH2D     | -0.358 | -8.77 | 5.62E-09 | 3.52E-06 | 10.7 |
| ILMN_5566   | NVefS1fVTn1_XjhDAk | KRT17     | -0.679 | -8.69 | 6.65E-09 | 4.01E-06 | 10.5 |
| ILMN_17789  | KXSucqCmoF_r4sOdt4 | IL4R      | -0.446 | -8.68 | 6.76E-09 | 4.01E-06 | 10.5 |
| ILMN_22732  | EP5e.efnftcn6in1XQ | CCL5      | -0.433 | -8.57 | 8.63E-09 | 4.99E-06 | 10.3 |
| ILMN_84564  | 9TYUiK93914c56hPek | NA        | -0.272 | -8.55 | 8.96E-09 | 5.05E-06 | 10.2 |
| ILMN_20142  | fr.cFeEaHuTH9XTU54 | CEACAM1   | -0.246 | -8.45 | 1.12E-08 | 6.07E-06 | 10   |
| ILMN_15421  | 6R7R.SJ2unRJu15Vr8 | GNA15     | -0.333 | -8.44 | 1.13E-08 | 6.07E-06 | 10   |
| ILMN_3012   | Bzkii9KFxeipi5ei_c | HLA-F     | -0.374 | -8.33 | 1.45E-08 | 7.61E-06 | 9.76 |
| ILMN_28687  | lcg6Ay4qUOVKvoqKKk | GJB5      | -0.328 | -8.31 | 1.51E-08 | 7.74E-06 | 9.72 |
| ILMN_21701  | fgetKf6njJ5.N6yR4  | IFRD1     | 0.323  | 8.27  | 1.67E-08 | 8.35E-06 | 9.63 |
| ILMN_21444  | TQ78QKpChd06Eel3JU | RHEBL1    | -0.283 | -8.25 | 1.74E-08 | 8.52E-06 | 9.59 |
| ILMN_9851   | ESXkU2I59i16KKNVCw | HAS3      | -0.412 | -8.23 | 1.81E-08 | 8.70E-06 | 9.55 |
| ILMN_17548  | cLulAutKul3p3lsv_U | IFI27     | -0.488 | -8.1  | 2.38E-08 | 1.12E-05 | 9.29 |
| ILMN_24608  | WtYp5.6ih9PhepeQ_k | BDKRB1    | -0.222 | -8.09 | 2.47E-08 | 1.13E-05 | 9.26 |
| ILMN_23731  | ZSVvWSocin9p._oSQC | ISG20     | -0.593 | -8.08 | 2.50E-08 | 1.13E-05 | 9.25 |
| ILMN_4643   | uUK90R6Xqfq5UzKK3s | IFI35     | -0.371 | -8.06 | 2.63E-08 | 1.14E-05 | 9.2  |
| ILMN_6244   | TokgOQqnk4XFKEgf1U | SERPINE1  | -0.343 | -8.06 | 2.63E-08 | 1.14E-05 | 9.2  |
| ILMN_20221  | cc3PU76FDfEeVy0e_Q | CYP4F3    | 0.266  | 7.95  | 3.36E-08 | 1.43E-05 | 8.97 |
| ILMN_43594  | ByBzz4UZddQtUmJW7E | LOC441019 | -0.442 | -7.68 | 6.08E-08 | 2.47E-05 | 8.4  |
| ILMN_27771  | KpkJLFLJhLa0.9EJk  | CHRM3     | 0.246  | 7.68  | 6.10E-08 | 2.47E-05 | 8.4  |
| ILMN_80709  | QaeB4dujrwv16rp6BU | LEMD1     | -0.271 | -7.68 | 6.13E-08 | 2.47E-05 | 8.39 |
| ILMN_12678  | l7afEnfWi3II7673tU | COBLL1    | 0.325  | 7.65  | 6.51E-08 | 2.57E-05 | 8.34 |
| ILMN_26260  | NA6luyXip675eXVe58 | PRKCDBP   | -0.395 | -7.56 | 8.15E-08 | 3.17E-05 | 8.12 |
| ILMN_138156 | NZ6BfqQoIO4klsiluU | RSAD2     | -0.392 | -7.36 | 1.27E-07 | 4.87E-05 | 7.7  |
| ILMN_1946   | Qt_chCvnuvS7I7Rx60 | SERPINE2  | -0.342 | -7.35 | 1.31E-07 | 4.91E-05 | 7.67 |
| ILMN_2234   | 30pLrnVN9dVEHudKes | GJB3      | -0.335 | -7.3  | 1.47E-07 | 5.42E-05 | 7.56 |

|             |                    |                |        |       |          |          |      |
|-------------|--------------------|----------------|--------|-------|----------|----------|------|
| ILMN_12370  | rd42yg_KLtWX7p4geg | SFN            | -0.508 | -7.28 | 1.53E-07 | 5.56E-05 | 7.52 |
| ILMN_25981  | B9RVCIHZnSwGoE5VeQ | MSLN           | -0.334 | -7.26 | 1.62E-07 | 5.79E-05 | 7.47 |
| ILMN_136941 | K1eTI7q3neu7gra6vA | CAMKV          | -0.311 | -7.24 | 1.70E-07 | 6.00E-05 | 7.42 |
| ILMN_13350  | NnekUL0Df11U.uJ7qE | ZNF323         | 0.408  | 7.18  | 1.94E-07 | 6.74E-05 | 7.29 |
| ILMN_24466  | fp75V5VfrXIXlxJL8w | IFITM1         | -0.466 | -7.16 | 2.02E-07 | 6.89E-05 | 7.26 |
| ILMN_12676  | xqTKEmk0a_T1T6HTkU | ETV5           | -0.32  | -7.1  | 2.36E-07 | 7.94E-05 | 7.11 |
| ILMN_20808  | ipN94F1_bgwrt4egno | TNFSF18        | -0.246 | -7.04 | 2.69E-07 | 8.91E-05 | 6.98 |
| ILMN_24538  | K0IN0ISkUhC6uCCUX4 | PLAUR          | -0.428 | -6.99 | 2.99E-07 | 9.78E-05 | 6.88 |
| ILMN_137475 | 3.0uJuuHkivLnuAJ6k | CNTNAP2        | 0.259  | 6.91  | 3.66E-07 | 0.000117 | 6.68 |
| ILMN_14210  | cgep6Z_jeq6iwSplDg | PRSS8          | -0.212 | -6.91 | 3.70E-07 | 0.000117 | 6.67 |
| ILMN_26813  | HqjN50IDoA3q9BSVeU | RAC2           | -0.294 | -6.88 | 3.89E-07 | 0.000122 | 6.63 |
| ILMN_6435   | 6eipewbvKnd0.olc1c | AKR1B10        | 0.245  | 6.88  | 3.94E-07 | 0.000122 | 6.61 |
| ILMN_23021  | fprgRN4JRzv16dwp20 | NKD2           | -0.386 | -6.86 | 4.15E-07 | 0.000126 | 6.57 |
| ILMN_36168  | ZSiGfnQR6P6yjtWdy0 | CLDN22         | 0.405  | 6.84  | 4.30E-07 | 0.000129 | 6.53 |
| ILMN_584    | fR0VZSiuDff7oYv4QU | VIT            | 0.28   | 6.81  | 4.59E-07 | 0.000136 | 6.47 |
| ILMN_22378  | c9dFJStdKQLXSUufyl | SOX7           | -0.279 | -6.8  | 4.69E-07 | 0.000137 | 6.45 |
| ILMN_12066  | rtniLXoHBLefWDgBVU | TMEM171        | -0.2   | -6.77 | 5.13E-07 | 0.000148 | 6.36 |
| ILMN_43196  | r6kSLRFR019ZQS1K0Q | SHANK3         | -0.212 | -6.76 | 5.18E-07 | 0.000148 | 6.35 |
| ILMN_4380   | xeqH7t5qjUiZEqLkTM | CYP1A1         | 0.343  | 6.71  | 5.82E-07 | 0.000164 | 6.24 |
| ILMN_5895   | 6ijm72au7nm9Erv3mk | CDKN1A         | -0.438 | -6.71 | 5.90E-07 | 0.000164 | 6.23 |
| ILMN_12928  | BdXIXor7fQnuh96j_Q | DUSP5          | -0.436 | -6.68 | 6.31E-07 | 0.000173 | 6.16 |
| ILMN_9793   | r1SJJToKJ6V0RTUXUQ | EFNB1          | -0.227 | -6.67 | 6.43E-07 | 0.000175 | 6.14 |
| ILMN_3642   | ZLkR3RV5E5MBqRFUu0 | LAMC3          | -0.254 | -6.55 | 8.55E-07 | 0.000229 | 5.87 |
| ILMN_2315   | cVSlwKeU.6q3sfOI4A | TNFAIP3        | -0.311 | -6.55 | 8.65E-07 | 0.000229 | 5.86 |
| ILMN_18130  | x.eVcSC7uTqX6ANxO4 | RP5-875H10.1   | 0.239  | 6.54  | 8.78E-07 | 0.00023  | 5.84 |
| ILMN_3090   | 6oievz.eV7mGL9J6UI | DKFZP686A01247 | 0.25   | 6.53  | 9.06E-07 | 0.000235 | 5.81 |
| ILMN_12139  | KtnaFShHEv3c5jdSJ0 | PSMB8          | -0.311 | -6.51 | 9.51E-07 | 0.000244 | 5.77 |
| ILMN_12849  | Hul6v6J0kV5qD3PA3U | TMEM105        | -0.192 | -6.47 | 1.04E-06 | 0.000262 | 5.68 |
| ILMN_27072  | fogblc9Ed6ghnDe4Tc | PLCG2          | -0.317 | -6.47 | 1.04E-06 | 0.000262 | 5.68 |
| ILMN_11442  | fiCeKcvUAF3XhV5e_k | ITGA3          | -0.428 | -6.44 | 1.11E-06 | 0.000276 | 5.62 |
| ILMN_20087  | EmX16K4R_Oqu73rx70 | COL17A1        | -0.263 | -6.42 | 1.17E-06 | 0.000287 | 5.57 |
| ILMN_28662  | oJH9jqvZ6b_73qRRbg | CYP26B1        | -0.281 | -6.4  | 1.24E-06 | 0.000301 | 5.51 |
| ILMN_11739  | xXQSiSoqC7iZfrOHwA | IRF1           | -0.282 | -6.32 | 1.50E-06 | 0.000359 | 5.33 |
| ILMN_23524  | rAgul1BJgesSJJZLis | KRT16          | -0.235 | -6.29 | 1.62E-06 | 0.000384 | 5.26 |
| ILMN_20169  | HiCg3odVNVUUowC14U | FLJ11286       | -0.336 | -6.24 | 1.82E-06 | 0.000427 | 5.14 |
| ILMN_15527  | rF39d3el6rndEV5GN8 | KRT9           | -0.187 | -6.24 | 1.84E-06 | 0.000428 | 5.13 |

|            |                     |           |        |       |          |          |      |
|------------|---------------------|-----------|--------|-------|----------|----------|------|
| ILMN_25243 | 9USOu0q.Qgt8qfUqtU  | TMEM16A   | -0.192 | -6.19 | 2.06E-06 | 0.000474 | 5.02 |
| ILMN_4927  | 6kdr.ronhj.ip4p68o  | ZBED2     | -0.309 | -6.18 | 2.11E-06 | 0.00048  | 5    |
| ILMN_27029 | 9IUkuX7kO4O5m3ecBQ  | CEBPA     | 0.225  | 6.14  | 2.34E-06 | 0.000526 | 4.9  |
| ILMN_1557  | 0Uu3XrB6Bd14qoNeuc  | ZFP36     | -0.294 | -6.06 | 2.84E-06 | 0.000632 | 4.71 |
| ILMN_79243 | WxdulJH10spP0ru0QE  | NA        | 0.251  | 6.06  | 2.86E-06 | 0.000632 | 4.71 |
| ILMN_6394  | To6iMe_60XegDE95x0  | IL1R2     | -0.147 | -6.04 | 2.96E-06 | 0.000648 | 4.68 |
| ILMN_37324 | o5SX5IAp1T7vFU0dBc  | C12orf56  | 0.242  | 6.04  | 3.03E-06 | 0.000657 | 4.65 |
| ILMN_27762 | utE_0gSunn65TYtXk   | PARP12    | -0.238 | -6.01 | 3.21E-06 | 0.000686 | 4.6  |
| ILMN_6497  | ulQV9XRfpFIRUofPwE  | ITGA5     | -0.394 | -6.01 | 3.23E-06 | 0.000686 | 4.59 |
| ILMN_7403  | BgprkrXTrndXT3ee3c  | EMP3      | -0.34  | -6    | 3.30E-06 | 0.000696 | 4.57 |
| ILMN_1778  | cenynVkOoAQWipSJ8s  | LGP2      | -0.244 | -5.99 | 3.41E-06 | 0.000712 | 4.54 |
| ILMN_18852 | WSjogkvLh6cit36jU0  | HS3ST1    | -0.202 | -5.97 | 3.53E-06 | 0.00073  | 4.51 |
| ILMN_4297  | oe8SGIOxgWUgp_4IKM  | VEGFC     | -0.336 | -5.97 | 3.57E-06 | 0.00073  | 4.49 |
| ILMN_9309  | rFqOBc19S6dnV7J3I0  | IGFBP4    | -0.378 | -5.97 | 3.59E-06 | 0.00073  | 4.49 |
| ILMN_14733 | WqPEpuLhTlydH1K.BI  | DTX3L     | -0.26  | -5.96 | 3.67E-06 | 0.000738 | 4.47 |
| ILMN_20933 | log4MatTQ0RsUXo77o  | NA        | 0.228  | 5.92  | 4.06E-06 | 0.000809 | 4.37 |
| ILMN_9405  | 9T0pSSQp4mJYuj4JzQ  | PLEK2     | -0.212 | -5.88 | 4.46E-06 | 0.000883 | 4.28 |
| ILMN_24486 | fouZ6hvu5Dlit1EUjs  | RAPGEF3   | -0.27  | -5.86 | 4.69E-06 | 0.00092  | 4.23 |
| ILMN_34065 | WZNV5dTXLAh1_c55J4  | LOC649970 | -0.332 | -5.77 | 5.80E-06 | 0.00112  | 4.03 |
| ILMN_18432 | ELieO5UUW7TilOr8d0  | IRS1      | -0.24  | -5.77 | 5.84E-06 | 0.00112  | 4.02 |
| ILMN_21009 | ThQrKUtDVBRzndS7FQ  | NFE2L3    | -0.339 | -5.76 | 5.97E-06 | 0.00114  | 4    |
| ILMN_1789  | xX56r6K.R_RNOir8uc  | CCL20     | -0.289 | -5.75 | 6.08E-06 | 0.00115  | 3.98 |
| ILMN_17479 | osGi.IIKnjin_u6Ukd4 | TAP1      | -0.394 | -5.75 | 6.18E-06 | 0.00116  | 3.97 |
| ILMN_13020 | clUpRJuohR.V_7QhP0  | HBEGF     | -0.313 | -5.73 | 6.49E-06 | 0.00121  | 3.92 |
| ILMN_1914  | ffgVF1e1eh3HVinexM  | DGKA      | -0.244 | -5.71 | 6.79E-06 | 0.00125  | 3.88 |
| ILMN_18566 | 0Vb3Klul.liHskiAGw  | HES4      | -0.303 | -5.71 | 6.86E-06 | 0.00126  | 3.87 |
| ILMN_30971 | llGfH57t5ug93Xe1XU  | KIAA1949  | -0.326 | -5.69 | 7.17E-06 | 0.0013   | 3.82 |
| ILMN_6116  | x1191.eKOVxXsEC2.c  | OAS2      | -0.299 | -5.66 | 7.65E-06 | 0.00138  | 3.76 |
| ILMN_7438  | KhXrooqfwV57TQl5fs  | SLC27A2   | 0.204  | 5.65  | 7.91E-06 | 0.00141  | 3.73 |
| ILMN_16111 | 3nivfFfvk55Rd18lLk  | C1orf116  | -0.331 | -5.63 | 8.24E-06 | 0.00146  | 3.69 |
| ILMN_1784  | xQapRN7Tt92hAs066l  | CLDN10    | 0.187  | 5.63  | 8.33E-06 | 0.00146  | 3.68 |
| ILMN_78198 | cd21IXIO391LnQvKJs  | NA        | -0.175 | -5.63 | 8.38E-06 | 0.00146  | 3.67 |
| ILMN_34882 | ilRCL6wigGl.VoDAkk  | SH2D5     | -0.231 | -5.63 | 8.40E-06 | 0.00146  | 3.67 |
| ILMN_8500  | xQox.DNS5a9ldFzukU  | ATP7A     | 0.22   | 5.59  | 9.19E-06 | 0.00157  | 3.58 |
| ILMN_16372 | NpO51Vwp3nXV6l4C9c  | TNFAIP2   | -0.212 | -5.59 | 9.22E-06 | 0.00157  | 3.58 |
| ILMN_14614 | Qn9O1SB8l.F7gu8cSU  | CYP1B1    | 0.299  | 5.59  | 9.24E-06 | 0.00157  | 3.58 |



|             |                    |           |        |       |          |         |      |
|-------------|--------------------|-----------|--------|-------|----------|---------|------|
| ILMN_5126   | EDUn7DWVAJpJQ2iZig | PLEKHA4   | -0.205 | -5.56 | 9.88E-06 | 0.00166 | 3.51 |
| ILMN_5201   | clpwqj6s4gPKIS2IVI | RTP4      | -0.21  | -5.56 | 9.94E-06 | 0.00166 | 3.51 |
| ILMN_15689  | TpnrGwMhQ5Lyunf1CE | OAS3      | -0.259 | -5.55 | 1.00E-05 | 0.00166 | 3.5  |
| ILMN_138374 | QZXtSkcinV_G.pl4AE | FOXD1     | -0.283 | -5.51 | 1.11E-05 | 0.00182 | 3.4  |
| ILMN_23748  | ZTFRXx9el33qceUe7k | RRAS      | -0.267 | -5.45 | 1.29E-05 | 0.00211 | 3.26 |
| ILMN_18897  | QQwfnu6CSaqCFyBX9U | FGF19     | -0.151 | -5.44 | 1.33E-05 | 0.00216 | 3.23 |
| ILMN_25026  | ilpekKqGLS6EdSgiaU | SEMA4B    | -0.222 | -5.43 | 1.38E-05 | 0.00223 | 3.19 |
| ILMN_26561  | cfP36eXrrlXq7TJU_c | OPN3      | 0.207  | 5.42  | 1.41E-05 | 0.00226 | 3.17 |
| ILMN_2717   | 3Aq_iknpElp4peng8U | OAS1      | -0.346 | -5.42 | 1.42E-05 | 0.00226 | 3.16 |
| ILMN_17676  | umiL0YHuVBk7zJSrXE | TNS3      | 0.305  | 5.39  | 1.52E-05 | 0.00239 | 3.1  |
| ILMN_22067  | Z0OiVaNUJXk_wlRLKQ | UBE1L     | -0.261 | -5.37 | 1.58E-05 | 0.00248 | 3.06 |
| ILMN_30616  | o8xDDiSvoelINYJCPk | LOC648517 | 0.308  | 5.36  | 1.65E-05 | 0.00256 | 3.02 |
| ILMN_11994  | HumVXrqEECKEU.9SJ4 | KCNN4     | -0.293 | -5.34 | 1.72E-05 | 0.00265 | 2.98 |
| ILMN_26680  | 3nbh5GvxlEAud_E1uE | RPRM      | 0.176  | 5.34  | 1.73E-05 | 0.00265 | 2.98 |
| ILMN_12475  | Tld2bA_gXXXsCSkif4 | BCAR3     | -0.287 | -5.31 | 1.87E-05 | 0.00283 | 2.9  |
| ILMN_28310  | HRK1OAv6fXr_O3vm6U | LASS6     | 0.33   | 5.31  | 1.87E-05 | 0.00283 | 2.9  |
| ILMN_9313   | 0Y70inv15JOz9TpURI | FGFBP1    | -0.261 | -5.3  | 1.90E-05 | 0.00286 | 2.88 |
| ILMN_5067   | xnqhEk0nQhtFdT3kdl | COL17A1   | -0.497 | -5.28 | 2.00E-05 | 0.00297 | 2.84 |
| ILMN_6529   | uSepjuYnjLiaSDSixQ | KRT19     | 0.289  | 5.28  | 2.00E-05 | 0.00297 | 2.83 |
| ILMN_17143  | Ngyragq.uc9VHx6EI4 | XDH       | -0.171 | -5.26 | 2.12E-05 | 0.00312 | 2.78 |
| ILMN_3162   | 3LV5rVlyXg15Wi6CeA | TIMP1     | -0.325 | -5.25 | 2.16E-05 | 0.00316 | 2.76 |
| ILMN_18737  | 6qPyUIkSH6PX3tXVRc | IER5      | -0.203 | -5.2  | 2.45E-05 | 0.00353 | 2.64 |
| ILMN_22317  | uSUS17eryrfUT_KNfU | UMPS      | 0.232  | 5.2   | 2.46E-05 | 0.00353 | 2.63 |
| ILMN_10998  | KPqFUxbyV_zsxQR5QI | RHOBTB3   | 0.333  | 5.2   | 2.46E-05 | 0.00353 | 2.63 |
| ILMN_18346  | EXezXaJFUv5f47tZ7s | GRHL2     | 0.236  | 5.18  | 2.60E-05 | 0.00371 | 2.58 |
| ILMN_5981   | NuKn3U4RTL3IQx5P6g | FLJ20160  | 0.214  | 5.13  | 2.90E-05 | 0.00412 | 2.47 |
| ILMN_26329  | 0RfXre_jl8zjjeffro | OPN3      | 0.237  | 5.11  | 3.05E-05 | 0.0043  | 2.43 |
| ILMN_22925  | fAEA0FqFUu.SB5KgEk | IFIT3     | -0.364 | -5.11 | 3.09E-05 | 0.00433 | 2.42 |
| ILMN_8146   | 9qiKALo6C7egKkYlC  | NCF2      | -0.2   | -5.1  | 3.13E-05 | 0.00436 | 2.4  |
| ILMN_1847   | oreTyCFR3xyvVwo3IM | TMTC3     | 0.25   | 5.1   | 3.20E-05 | 0.00441 | 2.38 |
| ILMN_1164   | opRpn6DXr756Od.5jw | RARRES3   | -0.283 | -5.09 | 3.21E-05 | 0.00441 | 2.38 |
| ILMN_30210  | 0..gjSdbqnr.rUSTBI | OCIAD2    | -0.249 | -5.08 | 3.31E-05 | 0.00452 | 2.35 |
| ILMN_2939   | fX9eh..pR5XocuAg6E | PKP2      | 0.246  | 5.05  | 3.61E-05 | 0.0049  | 2.27 |
| ILMN_5409   | KXrQlicb_pL3kiKNek | LOC130576 | 0.258  | 5.04  | 3.67E-05 | 0.00496 | 2.25 |
| ILMN_24095  | TrUix_.1Y7tSUnWSSc | BHLHB2    | -0.253 | -5.01 | 3.94E-05 | 0.00529 | 2.18 |
| ILMN_8388   | 9dF09VRc1U93l7Hgng | KLK10     | -0.2   | -5.01 | 3.98E-05 | 0.00529 | 2.17 |

|            |                    |          |        |       |          |         |      |
|------------|--------------------|----------|--------|-------|----------|---------|------|
| ILMN_5118  | oOISHh1NV4f1f4fRXs | NA       | -0.3   | -5.01 | 3.99E-05 | 0.00529 | 2.17 |
| ILMN_11909 | iLb36DFzuSUcVN0O0U | ITGAV    | 0.283  | 5     | 4.10E-05 | 0.00541 | 2.14 |
| ILMN_11103 | 3p46XcX_zUogHkiSV4 | TMEM2    | 0.264  | 4.98  | 4.32E-05 | 0.00566 | 2.09 |
| ILMN_15437 | TPeolujqponqv65L9Q | HMHA1    | -0.155 | -4.97 | 4.39E-05 | 0.00572 | 2.08 |
| ILMN_23962 | uqmXXquRj1dJ3q.Ds8 | GRAMD1A  | -0.249 | -4.97 | 4.42E-05 | 0.00572 | 2.07 |
| ILMN_22596 | 3Euf7Fo3ngk3tSes14 | PCAF     | 0.258  | 4.96  | 4.53E-05 | 0.00583 | 2.05 |
| ILMN_13158 | x0pE0_gxKCvV5F5S4k | DSTN     | 0.26   | 4.95  | 4.61E-05 | 0.0059  | 2.03 |
| ILMN_24301 | 0dU_ZfUKJ3SI7v9Xew | FLJ25801 | -0.205 | -4.94 | 4.76E-05 | 0.00606 | 2    |
| ILMN_2275  | HneP1qkl.SOaSExBF4 | CERK     | 0.254  | 4.92  | 4.94E-05 | 0.00626 | 1.96 |
| ILMN_16867 | 3mkS1R9VN1ULK67yAE | RBM14    | 0.353  | 4.92  | 5.04E-05 | 0.00633 | 1.94 |
| ILMN_20864 | ofu_QqQXbU.wekXSo8 | TMEM166  | 0.18   | 4.92  | 5.05E-05 | 0.00633 | 1.94 |
| ILMN_1026  | fcV3S0U75lf1e3op0U | SP110    | -0.225 | -4.91 | 5.11E-05 | 0.00636 | 1.93 |
| ILMN_22687 | EnUIXxc.Ah1eRbtFSs | MGC71993 | -0.137 | -4.9  | 5.28E-05 | 0.00654 | 1.9  |
| ILMN_9544  | fX.X0i4NNSHXToytq4 | ACO1     | 0.246  | 4.89  | 5.38E-05 | 0.00663 | 1.88 |
| ILMN_3719  | H9WdVTND.X.t1qniwM | MID1     | 0.253  | 4.88  | 5.51E-05 | 0.00675 | 1.86 |
| ILMN_23979 | 0VT9Ov9LpB8eFfv.l4 | SNTB1    | 0.153  | 4.87  | 5.70E-05 | 0.00695 | 1.82 |
| ILMN_26458 | 9qzqR7kCHUye5cotyg | ELL3     | -0.185 | -4.86 | 5.81E-05 | 0.00705 | 1.81 |
| ILMN_7664  | Qd_S7V4OkLjsX3jkt4 | KRT6B    | -0.303 | -4.84 | 6.11E-05 | 0.00737 | 1.76 |
| ILMN_24215 | ukpKBLurg_c6brC5Us | ALDH1A1  | 0.247  | 4.83  | 6.33E-05 | 0.00756 | 1.72 |
| ILMN_11008 | rg0n1K7KhV_KpQnhNQ | SUSD3    | -0.197 | -4.83 | 6.33E-05 | 0.00756 | 1.72 |
| ILMN_8598  | 3n.kkfxd3gJVloUiVU | NOS1AP   | -0.147 | -4.82 | 6.50E-05 | 0.00771 | 1.7  |
| ILMN_14446 | Kr544ac67tsTX7qlgU | CPT1A    | 0.178  | 4.81  | 6.53E-05 | 0.00771 | 1.69 |
| ILMN_27300 | 9UtUW7Ne6EN1eQj0VM | CYP26A1  | 0.196  | 4.81  | 6.60E-05 | 0.00773 | 1.69 |
| ILMN_13668 | EgX.UL43NS4bpeupv0 | TMEM158  | 0.305  | 4.81  | 6.62E-05 | 0.00773 | 1.68 |
| ILMN_1606  | KNCCAeJCI4meV5F1kg | UPP1     | -0.372 | -4.8  | 6.79E-05 | 0.00789 | 1.66 |
| ILMN_14791 | 6LJP1cU0JT7.uU9Klo | ICK      | 0.257  | 4.79  | 6.89E-05 | 0.00796 | 1.64 |
| ILMN_567   | HkkqEolBd4IRwl0hTo | ABCB6    | 0.243  | 4.77  | 7.32E-05 | 0.00842 | 1.58 |
| ILMN_23732 | BuNld8A_kue9fueVe0 | AFAP1L2  | -0.169 | -4.76 | 7.52E-05 | 0.0086  | 1.56 |
| ILMN_32441 | BN365zVQHfD1d8i4   | NA       | -0.172 | -4.75 | 7.67E-05 | 0.00873 | 1.54 |
| ILMN_36561 | Zy1cfQhTYoXikQjT5o | NA       | -0.186 | -4.74 | 7.92E-05 | 0.00893 | 1.51 |
| ILMN_21866 | 9criZPiUuucDnEx1B4 | CEACAM6  | 0.153  | 4.74  | 7.93E-05 | 0.00893 | 1.51 |
| ILMN_28163 | 66F5XqUR4V4xKTpIIM | CSF2     | -0.239 | -4.73 | 8.01E-05 | 0.00899 | 1.5  |
| ILMN_10210 | QZcruSjd.BLJCnje3o | SERPINB1 | -0.26  | -4.72 | 8.41E-05 | 0.00939 | 1.45 |
| ILMN_6835  | iUql7S3g6_14UsFQlw | LAMA3    | -0.18  | -4.7  | 8.69E-05 | 0.00965 | 1.42 |
| ILMN_13282 | KS7gsL3TUE.deINT3U | SLC6A15  | -0.168 | -4.69 | 8.99E-05 | 0.00993 | 1.39 |
| ILMN_6563  | iZauVnkv36hMomQIJw | CEBPD    | -0.175 | -4.65 | 9.89E-05 | 0.0108  | 1.3  |

|             |                     |           |        |       |          |        |       |
|-------------|---------------------|-----------|--------|-------|----------|--------|-------|
| ILMN_11795  | oLUKIIlpci4IAilsak  | PSMB8     | -0.329 | -4.65 | 9.90E-05 | 0.0108 | 1.3   |
| ILMN_30945  | lqXVe7h3F5He78zXuU  | ICHTHYIN  | -0.123 | -4.64 | 0.000102 | 0.0111 | 1.26  |
| ILMN_11097  | 6fi.vlHiCSmr6uooool | DUSP4     | -0.215 | -4.64 | 0.000103 | 0.0111 | 1.26  |
| ILMN_138746 | IQHtVfOFBJE.uCK9ko  | NA        | -0.188 | -4.63 | 0.000105 | 0.0113 | 1.24  |
| ILMN_14916  | EtiKq4IT90H3aWi.p4  | NA        | -0.449 | -4.62 | 0.000106 | 0.0113 | 1.23  |
| ILMN_21403  | ZlekT1T_57rs17v1_0  | CPA4      | -0.219 | -4.62 | 0.000106 | 0.0113 | 1.23  |
| ILMN_20959  | 9p8ZfZ13LiqDiXjhHM  | PCDH19    | 0.286  | 4.61  | 0.000111 | 0.0118 | 1.18  |
| ILMN_12441  | NpdoVOHx5d4l_n97s0  | LOC134145 | 0.264  | 4.58  | 0.000119 | 0.0126 | 1.12  |
| ILMN_42106  | No0Xhd6CuFxAyJdzmk  | NA        | 0.171  | 4.57  | 0.000123 | 0.0129 | 1.08  |
| ILMN_24843  | 3LqKTeqlArS6Sqs.Sw  | USP18     | -0.202 | -4.57 | 0.000123 | 0.0129 | 1.08  |
| ILMN_19000  | ikibkUOIUY6gKlz8HU  | S100A3    | -0.335 | -4.56 | 0.000124 | 0.013  | 1.08  |
| ILMN_12576  | o4t6qkXf3pe5F3d6fM  | IGHMBP2   | -0.164 | -4.56 | 0.000126 | 0.0131 | 1.07  |
| ILMN_18155  | IVJVEVzN1u512u8fV8  | PITPNM1   | -0.208 | -4.54 | 0.00013  | 0.0134 | 1.03  |
| ILMN_4348   | QuCQeDfSTvdNpol9_4  | AUTS2     | 0.151  | 4.54  | 0.00013  | 0.0134 | 1.03  |
| ILMN_30018  | xFXldy_vep.jd9QXIQ  | TGFA      | -0.202 | -4.53 | 0.000137 | 0.014  | 0.985 |
| ILMN_14413  | N1_g57I3sXLFXVnX4   | MAG1      | 0.362  | 4.51  | 0.00014  | 0.0143 | 0.959 |
| ILMN_15522  | Te003USVFTVeJecFF0  | S100A11   | -0.262 | -4.5  | 0.000145 | 0.0147 | 0.93  |
| ILMN_6383   | iAdwVL3tXonu4VaEKU  | ETFB      | 0.198  | 4.5   | 0.000146 | 0.0147 | 0.924 |
| ILMN_17130  | r6m4FFOVJYAn.iqeH0  | F3        | -0.218 | -4.5  | 0.000148 | 0.0148 | 0.911 |
| ILMN_16682  | iUiESVUaEAVVizTcXI  | SMAD6     | 0.281  | 4.49  | 0.000148 | 0.0148 | 0.91  |
| ILMN_22726  | 6qfvjoQgemvnjtFFUQ  | UBE1C     | 0.239  | 4.49  | 0.00015  | 0.0149 | 0.899 |
| ILMN_77975  | WYI_pDioIG7cvNRJWo  | NA        | 0.127  | 4.49  | 0.00015  | 0.0149 | 0.894 |
| ILMN_7388   | 6k.SOe_h9O1UFyfrio  | ZNF207    | 0.157  | 4.49  | 0.00015  | 0.0149 | 0.893 |
| ILMN_5586   | rpOuo6O_QCM1ol1Le0  | KITLG     | 0.159  | 4.47  | 0.000157 | 0.0154 | 0.854 |
| ILMN_920    | 3Una1dSkCiAah8fRKE  | LANCL2    | 0.202  | 4.46  | 0.00016  | 0.0156 | 0.834 |
| ILMN_19846  | Tyao14HoeDAG63VHmU  | MUC1      | -0.269 | -4.46 | 0.00016  | 0.0156 | 0.832 |
| ILMN_137079 | fTS1QQjpcgNk90XZfk  | MTMR11    | -0.206 | -4.45 | 0.000165 | 0.0161 | 0.802 |
| ILMN_29435  | WQK7ehxJEuhOU1Mel4  | RAVER2    | 0.198  | 4.45  | 0.000166 | 0.0161 | 0.796 |
| ILMN_25090  | EdTQi8fFCpKoKqMyK8  | CLCA2     | -0.125 | -4.44 | 0.000169 | 0.0163 | 0.779 |
| ILMN_138138 | rclicoKUolSyU7pS3FM | GSDMDC1   | -0.175 | -4.43 | 0.000173 | 0.0166 | 0.758 |
| ILMN_2749   | HU6l.0SqESn3wBBWn0  | GBP4      | -0.143 | -4.42 | 0.000181 | 0.0173 | 0.715 |
| ILMN_28109  | BKS6Xoin_97Brl.3yo  | PLEKHG3   | -0.204 | -4.41 | 0.000186 | 0.0177 | 0.691 |
| ILMN_73193  | WoeilXyXn7jBGQoDOo  | NA        | 0.187  | 4.39  | 0.000194 | 0.0182 | 0.647 |
| ILMN_10328  | KJw_09TFdEO1dgvouU  | ITFG1     | 0.193  | 4.39  | 0.000195 | 0.0182 | 0.645 |
| ILMN_21253  | HpR_L_11CrK7dP73pU  | SNRP70    | -0.223 | -4.39 | 0.000195 | 0.0182 | 0.643 |
| ILMN_16252  | BULSS1yVQFJUiSrd3A  | CRABP2    | -0.185 | -4.39 | 0.000195 | 0.0182 | 0.642 |

|             |                    |           |        |       |          |        |       |
|-------------|--------------------|-----------|--------|-------|----------|--------|-------|
| ILMN_35845  | 0lsEgje4lo66.kXvXg | GLT8D3    | 0.167  | 4.38  | 0.000196 | 0.0182 | 0.641 |
| ILMN_24220  | BfV6X4sgC2qNqkling | NDRG1     | -0.218 | -4.38 | 0.000197 | 0.0183 | 0.634 |
| ILMN_25006  | oZSV7W30VNVCXHIkIA | TMPRSS4   | -0.22  | -4.38 | 0.000198 | 0.0183 | 0.628 |
| ILMN_92751  | ERdUJAojqL5BICiS6o | NA        | -0.141 | -4.37 | 0.000201 | 0.0185 | 0.614 |
| ILMN_2115   | WqKzBXnXd1S3uQwk24 | LEPREL2   | -0.242 | -4.37 | 0.000202 | 0.0185 | 0.61  |
| ILMN_2022   | KSe4E6HfVUdd8.nRGo | ADRB2     | -0.327 | -4.37 | 0.000203 | 0.0185 | 0.605 |
| ILMN_743    | KI_i51Ul.QsLjjiTiA | SGOL2     | 0.216  | 4.36  | 0.000207 | 0.0188 | 0.587 |
| ILMN_17733  | Q5Qqd3A.JSygnHndek | CEP70     | 0.224  | 4.34  | 0.000221 | 0.02   | 0.523 |
| ILMN_19648  | luo2ITsJJNOiv4I5ZM | B2M       | -0.318 | -4.34 | 0.000221 | 0.02   | 0.523 |
| ILMN_9982   | f6UiKghEijgnolKnlo | FXYD5     | -0.262 | -4.33 | 0.000226 | 0.0203 | 0.503 |
| ILMN_6344   | uuVMyuJNX8jTqBSSHk | KCTD3     | 0.199  | 4.32  | 0.000231 | 0.0206 | 0.484 |
| ILMN_40266  | ZXxeqQvJT7dUtO.FFQ | NA        | 0.178  | 4.32  | 0.000232 | 0.0206 | 0.476 |
| ILMN_24167  | 6ut.eiK8ytHXql36tU | PLAU      | -0.291 | -4.32 | 0.000232 | 0.0206 | 0.476 |
| ILMN_42290  | Tt5huq2hqZcdZqzRSc | LOC554223 | -0.351 | -4.32 | 0.000233 | 0.0206 | 0.474 |
| ILMN_14470  | HnQ6FdqhULqn9BXdVQ | TMEM54    | -0.187 | -4.31 | 0.000239 | 0.0211 | 0.449 |
| ILMN_26440  | QVpORfv1O_011Tp9V4 | DACT2     | 0.132  | 4.3   | 0.000242 | 0.0211 | 0.437 |
| ILMN_137235 | 9meI1qEdzyOp53d8d0 | DLX5      | 0.325  | 4.3   | 0.000242 | 0.0211 | 0.436 |
| ILMN_12611  | x6gOLnSojonyqK6ufU | PSMB9     | -0.171 | -4.3  | 0.000243 | 0.0211 | 0.434 |
| ILMN_17796  | IH3LI3vFFF3DI3rZZE | KRT13     | 0.421  | 4.3   | 0.000244 | 0.0211 | 0.43  |
| ILMN_28633  | KevBfguHvsU6_5E59I | RDX       | 0.262  | 4.28  | 0.000255 | 0.022  | 0.388 |
| ILMN_23901  | TbRp3XP7ejZ6Gc4ips | SLC15A3   | -0.204 | -4.27 | 0.00026  | 0.0223 | 0.369 |
| ILMN_26726  | 3miN519rqpd6dl.qIA | TMEM121   | -0.154 | -4.26 | 0.000267 | 0.0229 | 0.343 |
| ILMN_121718 | 6ErhvbiuTp.3gjCSw8 | CDH13     | 0.133  | 4.26  | 0.000269 | 0.023  | 0.335 |
| ILMN_12554  | fSUs9G5SQSFx1H6cV4 | FAM46A    | -0.234 | -4.25 | 0.000279 | 0.0237 | 0.3   |
| ILMN_15973  | fN5VUoJUgOVJYC4h1w | CBLC      | -0.159 | -4.24 | 0.000282 | 0.0239 | 0.29  |
| ILMN_24193  | 93SJddpUfh8vfqehc  | MST1R     | -0.18  | -4.23 | 0.000293 | 0.0246 | 0.253 |
| ILMN_30058  | uXnriqAite7h95fjhE | TRIM16    | 0.186  | 4.23  | 0.000293 | 0.0246 | 0.253 |
| ILMN_11569  | HVJeHnnE3DVcUOXXtU | CIDEB     | -0.167 | -4.23 | 0.000294 | 0.0246 | 0.252 |
| ILMN_3384   | OR00.Tn3eR3qXP7PgU | OXGR1     | 0.145  | 4.22  | 0.000296 | 0.0247 | 0.243 |
| ILMN_27780  | oiRRQTpzaoTi9.nhdU | GLI3      | 0.36   | 4.22  | 3.00E-04 | 0.025  | 0.23  |
| ILMN_27275  | KsX5EfPHI0vvl6lbCg | SPPL2A    | 0.191  | 4.21  | 0.000306 | 0.0254 | 0.211 |
| ILMN_4873   | ESkXp4u56LijfgSAfU | COIL      | 0.181  | 4.21  | 0.000307 | 0.0254 | 0.209 |
| ILMN_21860  | E3InooSv7r4ofd7WO0 | NPR3      | 0.132  | 4.21  | 0.000309 | 0.0254 | 0.203 |
| ILMN_138662 | xd6Z60LRKEWCAU0bEY | EFEMP1    | 0.162  | 4.2   | 0.000313 | 0.0256 | 0.192 |
| ILMN_29081  | xWuu445TMWSp_fe0Ls | ADI1      | 0.245  | 4.19  | 0.000319 | 0.0261 | 0.172 |
| ILMN_139078 | rSFab6S7JTB.eO8sAE | DDX3X     | 0.259  | 4.19  | 0.000322 | 0.0262 | 0.165 |

|             |                    |          |         |       |          |        |         |
|-------------|--------------------|----------|---------|-------|----------|--------|---------|
| ILMN_7797   | WVfgELd0XiXtwH9oql | TM7SF3   | 0.175   | 4.19  | 0.000325 | 0.0264 | 0.155   |
| ILMN_20165  | Nsp3aql0GXnzXgLG.o | ZNF326   | 0.21    | 4.18  | 0.00033  | 0.0267 | 0.139   |
| ILMN_773    | HjjXHnVJBdxNSg4tXI | MAP4K1   | 0.152   | 4.16  | 0.000345 | 0.0278 | 0.0975  |
| ILMN_4032   | 3CuU0IKkne1XXndTfM | ARID3B   | -0.184  | -4.16 | 0.000349 | 0.028  | 0.086   |
| ILMN_17580  | 3qgoyrvWCuKJ_AVuk  | ASGR1    | -0.152  | -4.15 | 0.000354 | 0.0283 | 0.074   |
| ILMN_22634  | WdS75zuQjXd_if.5Mk | NA       | -0.201  | -4.15 | 0.000355 | 0.0283 | 0.0691  |
| ILMN_21049  | uud.vTT6V09Qkfxnt4 | ABCA1    | -0.334  | -4.15 | 0.000359 | 0.0285 | 0.0591  |
| ILMN_21408  | 6V5_jnuf9a.t3CVf3U | C1orf106 | -0.17   | -4.13 | 0.000373 | 0.0295 | 0.0238  |
| ILMN_17827  | lpl4BStHqi3n0.XeJ4 | SCG2     | 0.287   | 4.13  | 0.000379 | 0.0299 | 0.00856 |
| ILMN_2127   | ER5RHdTRXfXuNRUFc0 | FOSL1    | -0.357  | -4.11 | 0.000391 | 0.0307 | -0.0216 |
| ILMN_32537  | BKKCIC2qSieFujeh8  | TMC3     | -0.0919 | -4.11 | 0.000396 | 0.031  | -0.0352 |
| ILMN_8426   | WqOfok7txh9iMOh96U | OAT      | 0.199   | 4.11  | 0.000399 | 0.0311 | -0.0416 |
| ILMN_4154   | TSbXRclpXIVxX5X8Hw | RABGGTA  | -0.21   | -4.1  | 0.000402 | 0.0312 | -0.0477 |
| ILMN_11289  | rS4nqGiEJ1Lu5IKull | RBP1     | -0.261  | -4.1  | 0.000404 | 0.0313 | -0.0522 |
| ILMN_88389  | 0sz7qvrV90YFShe5_o | NA       | 0.22    | 4.1   | 0.000408 | 0.0315 | -0.0637 |
| ILMN_4419   | 3Xvv55T6TgOIB7p7xl | TIPARP   | -0.267  | -4.1  | 0.000409 | 0.0315 | -0.0656 |
| ILMN_29511  | xddfF_OHOqjWFKh0ho | UBR2     | 0.21    | 4.09  | 0.000417 | 0.032  | -0.0838 |
| ILMN_7975   | rciqi_JKZSp7TQTozg | FHL1     | -0.189  | -4.07 | 0.000431 | 0.0328 | -0.115  |
| ILMN_11713  | fpTFFeBOXiftMM74sU | RMI1     | 0.156   | 4.07  | 0.000431 | 0.0328 | -0.115  |
| ILMN_18544  | Trg5RNfpqvOhd_TtMk | PHKB     | 0.143   | 4.07  | 0.000433 | 0.0329 | -0.12   |
| ILMN_139301 | lKxJ6T.pl5MiE3iFdl | FLJ20152 | 0.218   | 4.07  | 0.000437 | 0.033  | -0.128  |
| ILMN_11972  | 0DVSkp.ovv1OuOqUjs | C6orf1   | -0.233  | -4.06 | 0.000447 | 0.0337 | -0.15   |
| ILMN_4825   | TUldM9NSfrc6nvnll  | AZIN1    | 0.147   | 4.06  | 0.000448 | 0.0337 | -0.152  |
| ILMN_17567  | WaqX1dq1ekgIT.FX34 | TMEM145  | -0.155  | -4.05 | 0.000457 | 0.0342 | -0.171  |
| ILMN_16332  | HFS7.KJOLlu7ubXtok | MX1      | -0.265  | -4.05 | 0.000459 | 0.0343 | -0.176  |
| ILMN_24091  | o0Gn1ka01IX3F4UHXQ | LGALS3BP | -0.263  | -4.04 | 0.000471 | 0.035  | -0.199  |
| ILMN_2073   | IBLUXe7cU4VX10R4Xs | HLA-E    | -0.369  | -4.03 | 0.000482 | 0.0357 | -0.222  |
| ILMN_11392  | 0k.d1Qvieww7v_j9XU | SOX21    | 0.502   | 4.03  | 0.000486 | 0.0359 | -0.229  |
| ILMN_19361  | KXndRB7V18VTsnY1gk | LRSAM1   | -0.192  | -4.03 | 0.000488 | 0.0359 | -0.233  |
| ILMN_21544  | EqBKce19Xug_WIDckU | PYGB     | -0.22   | -4.02 | 0.000493 | 0.0362 | -0.243  |
| ILMN_4097   | Q0R16neBERIJ13eCYc | ALPL     | -0.191  | -4.02 | 0.000494 | 0.0362 | -0.245  |
| ILMN_5889   | HpLtZeSN0FUhNCjBNs | IRF6     | -0.234  | -4.01 | 0.000503 | 0.0367 | -0.263  |
| ILMN_39441  | BFq7eaygQip4iretek | UNK      | 0.224   | 4.01  | 0.000508 | 0.037  | -0.272  |
| ILMN_23980  | ueed9enmNCd6hex5ul | CYP26A1  | 0.115   | 4     | 0.00052  | 0.0375 | -0.295  |
| ILMN_42527  | ZuVU025DF0uSQdfj34 | NA       | 0.156   | 4     | 0.00052  | 0.0375 | -0.295  |
| ILMN_4890   | iWrqCKi0TZ.qjU_u.o | EML2     | -0.307  | -4    | 0.000521 | 0.0375 | -0.296  |

|             |                     |           |        |       |          |        |        |
|-------------|---------------------|-----------|--------|-------|----------|--------|--------|
| ILMN_137166 | if7sbTCr99x3JEoikE  | NA        | 0.134  | 4     | 0.000523 | 0.0375 | -0.299 |
| ILMN_138532 | 9foqAmzs8lpJe_vVHw  | NA        | 0.181  | 4     | 0.000526 | 0.0377 | -0.306 |
| ILMN_8642   | EA6JXik0nPMfqHcXdE  | BZW2      | 0.169  | 3.99  | 0.000534 | 0.0381 | -0.32  |
| ILMN_25430  | BLXpdZI59P_Ffp5Lol  | WARS      | -0.259 | -3.99 | 0.000537 | 0.0382 | -0.326 |
| ILMN_10621  | ojrlmSOVFHgluH_EI4  | CASP1     | -0.205 | -3.99 | 0.000538 | 0.0382 | -0.327 |
| ILMN_137196 | QRHZU.3C6.IK_S3I0U  | EXOC5     | 0.132  | 3.98  | 0.000545 | 0.0385 | -0.339 |
| ILMN_13015  | TKg7h3.ZUmW6HZp_6c  | TPD52L1   | 0.0983 | 3.98  | 0.000548 | 0.0386 | -0.344 |
| ILMN_28362  | 9eUZQVSAMVROUgC4LU  | WWC3      | 0.143  | 3.97  | 0.000561 | 0.0394 | -0.366 |
| ILMN_19245  | Tr5SOuMEuwpfq3Ck1E  | TSPAN6    | 0.201  | 3.97  | 0.000563 | 0.0394 | -0.369 |
| ILMN_414    | 3dC3s311XI8.fO.5RI  | KLHL5     | 0.265  | 3.96  | 0.000577 | 0.0402 | -0.393 |
| ILMN_138893 | lg.VTodSNfxx4HRKns  | C16orf52  | -0.165 | -3.96 | 0.000578 | 0.0402 | -0.395 |
| ILMN_12147  | 39OdESnOqOup1K0neQ  | SSNA1     | -0.128 | -3.96 | 0.00058  | 0.0403 | -0.399 |
| ILMN_23553  | 9u7O543_R6d6WX3eCc  | GAST      | -0.146 | -3.95 | 0.000585 | 0.0405 | -0.407 |
| ILMN_13790  | miefXv994_deqAEZc   | SFRS2B    | 0.211  | 3.95  | 0.000588 | 0.0406 | -0.412 |
| ILMN_28070  | 0KFI_KSRwko5fdeihg  | MPHOSPH9  | 0.151  | 3.94  | 0.000602 | 0.0414 | -0.434 |
| ILMN_14467  | ugUohG7pqS6hUyN94A  | GSR       | 0.264  | 3.94  | 0.000606 | 0.0415 | -0.44  |
| ILMN_37934  | QepLldarJjz1J5x5.o  | NA        | -0.168 | -3.94 | 0.000607 | 0.0415 | -0.442 |
| ILMN_10971  | Q_.EWO1eDNJeycOh_o  | M6PRBP1   | -0.264 | -3.94 | 0.00061  | 0.0415 | -0.446 |
| ILMN_11682  | rrhKyeoXKc3xTgr7.k  | TSC22D1   | -0.27  | -3.93 | 0.000616 | 0.0417 | -0.455 |
| ILMN_36244  | IGK2bVV24UkB1wCaV8  | NA        | 0.135  | 3.93  | 0.000617 | 0.0417 | -0.458 |
| ILMN_35293  | HAtMxeK5FojIH3leIU  | NA        | -0.246 | -3.93 | 0.000618 | 0.0417 | -0.459 |
| ILMN_17806  | fuGuHul_CXooe_pOyE  | FBXO31    | -0.199 | -3.93 | 0.000623 | 0.0419 | -0.466 |
| ILMN_24005  | rdlxXU3HpU1XdcBAHU  | SOSTDC1   | 0.267  | 3.92  | 0.000632 | 0.0424 | -0.48  |
| ILMN_115487 | Qo44ioE3_Vn143y6gl  | SAPS3     | 0.252  | 3.92  | 0.000633 | 0.0424 | -0.482 |
| ILMN_4735   | HUrVUiUN5Vd3Od_B9w  | OASL      | -0.384 | -3.92 | 0.000641 | 0.0427 | -0.493 |
| ILMN_7283   | unghLpTktYiy63I3A   | LCMT2     | 0.132  | 3.91  | 0.000649 | 0.043  | -0.505 |
| ILMN_4184   | iHq69UeThXc1eU3tVM  | ABHD4     | 0.134  | 3.91  | 0.000649 | 0.043  | -0.506 |
| ILMN_12933  | xdfrij1kuli6eqToKQg | F12       | -0.177 | -3.91 | 0.000654 | 0.0432 | -0.512 |
| ILMN_14716  | WUcRfeqeh_.SSf6_R4  | ZNF689    | 0.207  | 3.91  | 0.000656 | 0.0432 | -0.515 |
| ILMN_27277  | odF3XHR8CVI4SAUaUQ  | IL1B      | -0.178 | -3.91 | 0.000662 | 0.0435 | -0.525 |
| ILMN_11911  | oiJXrXITL0IECy_1f4  | FXN       | 0.109  | 3.9   | 0.000664 | 0.0435 | -0.526 |
| ILMN_27436  | rwiETEi6lWp6lCJ5eg  | PGF       | -0.145 | -3.9  | 0.000672 | 0.0439 | -0.539 |
| ILMN_19028  | ioJ4pLCNH4lSiljnks  | MRPS16    | 0.221  | 3.9   | 0.000674 | 0.0439 | -0.541 |
| ILMN_87528  | itQOJ5e5NNDubqgiq4  | LOC728196 | -0.14  | -3.89 | 0.000681 | 0.0443 | -0.552 |
| ILMN_15850  | o67h4JQSuEa02CJJlQ  | ABHD12    | 0.157  | 3.89  | 0.000686 | 0.0445 | -0.559 |
| ILMN_14125  | oW_q72_4X5A67TFSgk  | HYLS1     | 0.154  | 3.89  | 0.000695 | 0.0449 | -0.571 |

|             |                    |         |        |       |          |        |        |
|-------------|--------------------|---------|--------|-------|----------|--------|--------|
| ILMN_71180  | 6u.OOLSLn.Xa6hL56U | AK3L1   | 0.19   | 3.87  | 0.000718 | 0.0463 | -0.602 |
| ILMN_410    | iQIU4nn.OeAOtP1e9E | DCUN1D1 | 0.203  | 3.86  | 0.000735 | 0.0472 | -0.624 |
| ILMN_22073  | umQWvdYBOi17KQrfF4 | MEST    | 0.144  | 3.86  | 0.000737 | 0.0472 | -0.627 |
| ILMN_17590  | WTu6uTe6SqlAiTu1lc | TRIM7   | -0.111 | -3.86 | 0.000741 | 0.0473 | -0.632 |
| ILMN_12133  | rSXVW1UE5N0d6u3638 | FSCN1   | -0.229 | -3.86 | 0.000745 | 0.0474 | -0.637 |
| ILMN_11177  | BuoBX.m618p8Q7keDY | PRNP    | -0.252 | -3.86 | 0.000746 | 0.0474 | -0.639 |
| ILMN_3516   | HCiVRKCg96CM5e6NeE | SNCA    | 0.151  | 3.85  | 0.000752 | 0.0475 | -0.646 |
| ILMN_37893  | Eigr1Ha9.C2UAIUlag | NA      | 0.17   | 3.85  | 0.000752 | 0.0475 | -0.646 |
| ILMN_28712  | Ng8fJlqqXqIV6ofS4  | ARNTL2  | -0.132 | -3.85 | 0.000767 | 0.0483 | -0.664 |
| ILMN_22093  | Tpa8gVuHs93V_jFXOU | HERC5   | -0.286 | -3.84 | 0.000776 | 0.0487 | -0.676 |
| ILMN_138485 | 9UR5jr8IOpCgkF6Ouk | NA      | -0.1   | -3.84 | 0.000779 | 0.0488 | -0.679 |
| ILMN_31644  | ODgBN4tdhTHLr2cSig | SPANXB2 | -0.163 | -3.84 | 0.000791 | 0.0494 | -0.693 |
| ILMN_1353   | 3JGiA1ORqAJ94RLSdU | ZSCAN29 | -0.149 | -3.83 | 0.000801 | 0.0499 | -0.706 |

## NCI-H1299

| ProbeName   | ID                  | GeneSymbol | logFC  | t     | P.Value  | adj.P.Val | B    |
|-------------|---------------------|------------|--------|-------|----------|-----------|------|
| ILMN_1814   | 3mICpKigaKiu6uJ4zA  | WDR79      | 0.503  | 8.67  | 6.96E-09 | 0.000157  | 9.36 |
| ILMN_16054  | B7zrorrerri3gpd3TeE | C16orf73   | 0.249  | 7.44  | 1.07E-07 | 0.000686  | 7.16 |
| ILMN_18432  | ELieO5UUW7TilOr8d0  | IRS1       | -0.309 | -7.42 | 1.12E-07 | 0.000686  | 7.13 |
| ILMN_8623   | i6SQgrik0qBqDSnqHg  | C10orf10   | -0.304 | -7.38 | 1.22E-07 | 0.000686  | 7.06 |
| ILMN_10669  | HQpQmhlqlOr7KPigaA  | TLE1       | -0.286 | -6.83 | 4.42E-07 | 0.00199   | 5.99 |
| ILMN_1772   | QDirI SfMOu8qo4k54  | BMP6       | 0.272  | 6.65  | 6.79E-07 | 0.00226   | 5.63 |
| ILMN_11856  | WAKjP1aFSZpdBSpKAg  | ZNF467     | -0.418 | -6.64 | 7.00E-07 | 0.00226   | 5.61 |
| ILMN_9533   | lm9UPOn3dl1Jfgvf4U  | UBE2L3     | 0.259  | 6.4   | 1.25E-06 | 0.00354   | 5.12 |
| ILMN_17622  | i7o1RUDUHTXr_eRHr0  | HIST1H2BD  | -0.337 | -6.31 | 1.56E-06 | 0.00392   | 4.93 |
| ILMN_13518  | 0EBVuzd0MCulgqXY7o  | NTSR1      | -0.186 | -6.17 | 2.20E-06 | 0.00496   | 4.64 |
| ILMN_4661   | 0U7r1fW6FJbDAiUKy4  | BCKDHB     | -0.24  | -6.11 | 2.50E-06 | 0.00513   | 4.53 |
| ILMN_27899  | BVfXJ7OF_Pu5fBZ3uE  | DNASE2     | -0.292 | -6.06 | 2.85E-06 | 0.00534   | 4.42 |
| ILMN_18304  | EXSUfcJEFIpUGHCUIQ  | PTGER1     | -0.248 | -6.03 | 3.08E-06 | 0.00534   | 4.36 |
| ILMN_10833  | NkHI8H_XF6XXzjVXWk  | FLJ36070   | -0.262 | -5.76 | 5.98E-06 | 0.00962   | 3.79 |
| ILMN_137102 | imS5fkxUBSuom.74k4  | NA         | -0.301 | -5.7  | 7.04E-06 | 0.0106    | 3.65 |
| ILMN_6196   | lks.ySTbiQol5PVKqY  | VTI1A      | -0.243 | -5.66 | 7.69E-06 | 0.0108    | 3.57 |
| ILMN_6015   | HnHf5R593uDQqfFQ5I  | NWD1       | -0.153 | -5.63 | 8.21E-06 | 0.0109    | 3.52 |
| ILMN_11864  | OrISlOj8fp6326KAiY  | C6orf165   | -0.184 | -5.59 | 9.08E-06 | 0.0114    | 3.43 |
| ILMN_2597   | rCISqivKleMk7jp0p4  | MAP3K12    | 0.243  | 5.56  | 9.98E-06 | 0.0118    | 3.35 |

|             |                    |          |        |       |          |        |      |
|-------------|--------------------|----------|--------|-------|----------|--------|------|
| ILMN_11004  | rm4nlOzZSW_f7x4G5Y | PBX4     | 0.233  | 5.54  | 1.04E-05 | 0.0118 | 3.31 |
| ILMN_30018  | xFXldy_vep.jd9QXIQ | TGFA     | -0.241 | -5.4  | 1.48E-05 | 0.0159 | 3.01 |
| ILMN_6281   | BRbrB_Q7pZV5np9.dc | SPRY1    | -0.244 | -5.34 | 1.73E-05 | 0.017  | 2.87 |
| ILMN_3288   | IAZSt5e9_epDp46eUs | ABR      | -0.304 | -5.34 | 1.73E-05 | 0.017  | 2.87 |
| ILMN_26701  | KpRe1Fu6lue7XztPsM | MXD4     | -0.328 | -5.29 | 1.96E-05 | 0.0185 | 2.76 |
| ILMN_1424   | x3011GvRydcXgigKqU | WNT5B    | 0.179  | 5.2   | 2.46E-05 | 0.0222 | 2.57 |
| ILMN_22028  | HpSYoruoTDJeLn6vFM | ARHGAP19 | 0.274  | 5.15  | 2.81E-05 | 0.0243 | 2.45 |
| ILMN_7229   | HZVSXnhVSf3EhFI.uA | ALKBH7   | -0.221 | -5.12 | 3.02E-05 | 0.0252 | 2.39 |
| ILMN_3042   | ou7l6SBHkdQ.XakiEA | DLC1     | -0.242 | -5.05 | 3.62E-05 | 0.0291 | 2.23 |
| ILMN_2941   | xfcujuvdAankiOifSk | TGIF1    | -0.284 | -5.03 | 3.77E-05 | 0.0293 | 2.2  |
| ILMN_137480 | 6KK4561eIF3EleB34g | KATNB1   | 0.253  | 4.93  | 4.85E-05 | 0.0352 | 1.98 |
| ILMN_4999   | Qnd1TULhSOVx0n1NFU | GPR162   | -0.237 | -4.92 | 4.97E-05 | 0.0352 | 1.95 |
| ILMN_24439  | WJTReJBQA9d5nqtYeU | GPR3     | 0.199  | 4.92  | 5.00E-05 | 0.0352 | 1.95 |
| ILMN_102811 | B47o4oni0Y7oYoni2Y | NA       | 0.202  | 4.87  | 5.72E-05 | 0.0391 | 1.83 |
| ILMN_37799  | Zl3fbpPwEldE3Vf8eI | NA       | -0.163 | -4.83 | 6.22E-05 | 0.041  | 1.76 |
| ILMN_14708  | rXpX3TIQhL79Eougu4 | CSRP2BP  | 0.171  | 4.81  | 6.63E-05 | 0.041  | 1.7  |
| ILMN_2670   | BlfRT7oOOV6fwr8nUQ | KLF9     | -0.32  | -4.8  | 6.76E-05 | 0.041  | 1.69 |
| ILMN_23253  | oqiqsel_pdc45ITrg8 | ZWINT    | 0.177  | 4.78  | 7.20E-05 | 0.041  | 1.63 |
| ILMN_8273   | rsVr5xrgOCuVZNSAhk | PLCXD1   | -0.28  | -4.77 | 7.23E-05 | 0.041  | 1.63 |
| ILMN_10629  | 0qb7u7bh9sXdCVdfsc | ADRA1B   | -0.193 | -4.77 | 7.27E-05 | 0.041  | 1.62 |
| ILMN_12588  | KX7nZdMrtz_h3Cdxq4 | LAMA5    | -0.282 | -4.77 | 7.28E-05 | 0.041  | 1.62 |
| ILMN_12442  | 0EgReqeagSXmnp3TQc | LMNA     | -0.238 | -4.76 | 7.48E-05 | 0.0411 | 1.6  |
| ILMN_3691   | fSglR7F6JTeowh.hU4 | C1orf61  | 0.162  | 4.75  | 7.68E-05 | 0.0412 | 1.58 |
| ILMN_17169  | 3dQeX9U13gcpPBJVbo | INCA1    | 0.161  | 4.7   | 8.82E-05 | 0.0453 | 1.45 |
| ILMN_16130  | Q_eF_I_V.sRC9Uq4kk | TACC2    | -0.198 | -4.7  | 8.84E-05 | 0.0453 | 1.45 |
| ILMN_3621   | ffaIXofRMBQfVN1UuU | ZNF655   | 0.238  | 4.68  | 9.23E-05 | 0.0462 | 1.41 |
| ILMN_4649   | xafXuefu0DoF5XcCR8 | CYBRD1   | -0.269 | -4.63 | 0.000103 | 0.0494 | 1.32 |
| ILMN_2297   | riaFdd.qXbif.58070 | CTDSP2   | -0.213 | -4.63 | 0.000105 | 0.0494 | 1.3  |
| ILMN_17805  | B5uqdWUSBROdegRAOg | ISYNA1   | -0.256 | -4.63 | 0.000106 | 0.0494 | 1.29 |
| ILMN_19202  | x1o13.jeVKAqOT4R3U | CBLN2    | 0.163  | 4.62  | 0.000107 | 0.0494 | 1.28 |
